# Supplementary material for: Enabling factor for cancer hallmark acquisition: Small nucleolar RNA host gene 17
Source: Frontiers journal article supplement (doi:10.3389/fonc.2022.974939), 2022-09-14
Supplement: Data_Sheet_2.zip [file GO_result.tuyywr0g2.xlsx]

## Sheet: Annotation
MyList	Gene ID	Type	Tax ID	Homologene Gene ID	Homologene Gene Tax ID	Gene Symbol	Description	Biological Process (GO)	Cellular Component (GO)	Molecular Function (GO)	GO:0048018 receptor ligand activity	GO:0006954 inflammatory response	GO:0032103 positive regulation of respons	GO:0001819 positive regulation of cytokin	GO:0001775 cell activation	GO:0002697 regulation of immune effector	GO:0032102 negative regulation of respons	GO:0050865 regulation of cell activation	GO:0001934 positive regulation of protein	GO:0042277 peptide binding	GO:0008285 negative regulation of cell po	GO:0071363 cellular response to growth fa	GO:0036293 response to decreased oxygen l	GO:0006959 humoral immune response	GO:0030162 regulation of proteolysis	GO:0031983 vesicle lumen	GO:0051046 regulation of secretion	GO:0098797 plasma membrane protein comple	GO:0002274 myeloid leukocyte activation	GO:0045765 regulation of angiogenesis
CXCL10	3627	symbol	H. sapiens	3627	H. sapiens	CXCL10	C-X-C motif chemokine ligand 10	GO:1901740 negative regulation of myoblast fusion;GO:0034242 negative regulation of syncytium formation by plasma membrane fusion;GO:1901509 regulation of endothelial tube morphogenesis	GO:0009897 external side of plasma membrane;GO:0098552 side of membrane;GO:0009986 cell surface	GO:0048248 CXCR3 chemokine receptor binding;GO:0008603 cAMP-dependent protein kinase regulator activity;GO:0045236 CXCR chemokine receptor binding	1	1	1	0	1	0	0	0	0	0	0	0	0	1	0	0	0	0	0	1
INHBA	3624	symbol	H. sapiens	3624	H. sapiens	INHBA	inhibin subunit beta A	GO:0042701 progesterone secretion;GO:0046882 negative regulation of follicle-stimulating hormone secretion;GO:0060279 positive regulation of ovulation	GO:0043509 activin A complex;GO:0048180 activin complex;GO:0043512 inhibin A complex	GO:0070699 type II activin receptor binding;GO:0034711 inhibin binding;GO:0070697 activin receptor binding	1	1	0	0	1	0	1	1	1	1	1	1	1	0	0	0	1	0	0	0
IL6	3569	symbol	H. sapiens	3569	H. sapiens	IL6	interleukin 6	GO:0070091 glucagon secretion;GO:0001781 neutrophil apoptotic process;GO:0002384 hepatic immune response	GO:0005896 interleukin-6 receptor complex;GO:0005788 endoplasmic reticulum lumen;GO:0098802 plasma membrane signaling receptor complex	GO:0005138 interleukin-6 receptor binding;GO:0070851 growth factor receptor binding;GO:0008083 growth factor activity	1	1	1	1	1	1	0	1	1	0	1	0	0	1	0	0	1	1	0	1
PI3	5266	symbol	H. sapiens	5266	H. sapiens	PI3	peptidase inhibitor 3	GO:0007620 copulation;GO:0007617 mating behavior;GO:0018149 peptide cross-linking	GO:0001533 cornified envelope;GO:0031012 extracellular matrix;GO:0030312 external encapsulating structure	GO:0030280 structural constituent of skin epidermis;GO:0004867 serine-type endopeptidase inhibitor activity;GO:0004866 endopeptidase inhibitor activity	0	1	0	1	0	0	0	0	0	0	0	0	0	1	1	0	0	0	0	0
SEMA6A	57556	symbol	H. sapiens	57556	H. sapiens	SEMA6A	semaphorin 6A	GO:0106089 negative regulation of cell adhesion involved in sprouting angiogenesis;GO:0106088 regulation of cell adhesion involved in sprouting angiogenesis;GO:1900747 negative regulation of vascular endothelial growth factor signaling pathway	GO:0030424 axon;GO:0043005 neuron projection;GO:0005887 integral component of plasma membrane	GO:0030215 semaphorin receptor binding;GO:0045499 chemorepellent activity;GO:0048018 receptor ligand activity	1	1	0	0	0	0	1	1	1	0	0	1	0	0	0	0	0	0	0	1
CSF2	1437	symbol	H. sapiens	1437	H. sapiens	CSF2	colony stimulating factor 2	GO:0034021 response to silicon dioxide;GO:0038157 granulocyte-macrophage colony-stimulating factor signaling pathway;GO:0001821 histamine secretion	GO:0030526 granulocyte macrophage colony-stimulating factor receptor complex;GO:0098802 plasma membrane signaling receptor complex;GO:0043235 receptor complex	GO:0005129 granulocyte macrophage colony-stimulating factor receptor binding;GO:0070851 growth factor receptor binding;GO:0008083 growth factor activity	1	1	0	1	1	0	0	1	1	0	0	0	0	0	0	0	0	1	1	0
S100A9	6280	symbol	H. sapiens	6280	H. sapiens	S100A9	S100 calcium binding protein A9	GO:0035606 peptidyl-cysteine S-trans-nitrosylation;GO:0070488 neutrophil aggregation;GO:0032119 sequestering of zinc ion	GO:0034774 secretory granule lumen;GO:0060205 cytoplasmic vesicle lumen;GO:0031983 vesicle lumen	GO:0035662 Toll-like receptor 4 binding;GO:0050543 icosatetraenoic acid binding;GO:0050544 arachidonic acid binding	0	1	1	1	0	0	0	0	0	0	0	0	0	1	1	1	0	0	0	0
RSAD2	91543	symbol	H. sapiens	91543	H. sapiens	RSAD2	radical S-adenosyl methionine domain containing 2	GO:0034165 positive regulation of toll-like receptor 9 signaling pathway;GO:0034157 positive regulation of toll-like receptor 7 signaling pathway;GO:0034155 regulation of toll-like receptor 7 signaling pathway	GO:0005811 lipid droplet;GO:0001650 fibrillar center;GO:0005741 mitochondrial outer membrane	GO:0051539 4 iron, 4 sulfur cluster binding;GO:0051536 iron-sulfur cluster binding;GO:0051540 metal cluster binding	0	0	0	1	1	1	0	0	0	0	0	0	0	0	0	0	1	0	0	0
SSTR2	6752	symbol	H. sapiens	6752	H. sapiens	SSTR2	somatostatin receptor 2	GO:0038169 somatostatin receptor signaling pathway;GO:0038170 somatostatin signaling pathway;GO:0030432 peristalsis	GO:0043005 neuron projection;GO:0005887 integral component of plasma membrane;GO:0031226 intrinsic component of plasma membrane	GO:0004994 somatostatin receptor activity;GO:0042923 neuropeptide binding;GO:0008188 neuropeptide receptor activity	0	1	0	0	0	0	0	0	0	1	1	0	0	0	0	0	0	0	0	0
ORM1	5004	symbol	H. sapiens	5004	H. sapiens	ORM1	orosomucoid 1	GO:0006953 acute-phase response;GO:0032731 positive regulation of interleukin-1 beta production;GO:0032715 negative regulation of interleukin-6 production	GO:1904724 tertiary granule lumen;GO:0035580 specific granule lumen;GO:0031093 platelet alpha granule lumen	GO:0005515 protein binding;GO:0005488 binding;GO:0003674 molecular_function	0	1	0	1	0	0	0	0	0	0	0	0	0	0	0	1	0	0	0	0
CCL3	6348	symbol	H. sapiens	6348	H. sapiens	CCL3	C-C motif chemokine ligand 3	GO:0002278 eosinophil activation involved in immune response;GO:0043307 eosinophil activation;GO:0043308 eosinophil degranulation	GO:0005615 extracellular space;GO:0005576 extracellular region;GO:0005829 cytosol	GO:0031726 CCR1 chemokine receptor binding;GO:0031730 CCR5 chemokine receptor binding;GO:0016004 phospholipase activator activity	1	1	1	1	1	0	1	1	1	0	0	0	0	0	0	0	0	0	1	0
IL1A	3552	symbol	H. sapiens	3552	H. sapiens	IL1A	interleukin 1 alpha	GO:1904444 regulation of establishment of Sertoli cell barrier;GO:1904445 negative regulation of establishment of Sertoli cell barrier;GO:0001660 fever generation	GO:0009986 cell surface;GO:0005615 extracellular space;GO:0005576 extracellular region	GO:0005149 interleukin-1 receptor binding;GO:0005507 copper ion binding;GO:0070851 growth factor receptor binding	1	1	0	1	0	0	0	1	1	0	1	0	1	0	0	0	1	0	0	1
NPPC	4880	symbol	H. sapiens	4880	H. sapiens	NPPC	natriuretic peptide C	GO:0003419 growth plate cartilage chondrocyte proliferation;GO:1900194 negative regulation of oocyte maturation;GO:1900193 regulation of oocyte maturation	GO:0030141 secretory granule;GO:0099503 secretory vesicle;GO:0031410 cytoplasmic vesicle	GO:0051427 hormone receptor binding;GO:0005179 hormone activity;GO:0048018 receptor ligand activity	1	0	0	0	0	0	0	0	0	0	1	1	1	0	0	0	0	0	0	0
CSF3	1440	symbol	H. sapiens	1440	H. sapiens	CSF3	colony stimulating factor 3	GO:2000251 positive regulation of actin cytoskeleton reorganization;GO:0030851 granulocyte differentiation;GO:2000249 regulation of actin cytoskeleton reorganization	GO:0071682 endocytic vesicle lumen;GO:0043202 lysosomal lumen;GO:0005775 vacuolar lumen	GO:0005130 granulocyte colony-stimulating factor receptor binding;GO:0070851 growth factor receptor binding;GO:0008083 growth factor activity	1	1	0	1	1	1	0	0	1	0	0	0	0	0	0	0	0	0	0	0
TLR2	7097	symbol	H. sapiens	7097	H. sapiens	TLR2	toll like receptor 2	GO:0042495 detection of triacyl bacterial lipopeptide;GO:0038124 toll-like receptor TLR6:TLR2 signaling pathway;GO:0042496 detection of diacyl bacterial lipopeptide	GO:0035354 Toll-like receptor 1-Toll-like receptor 2 protein complex;GO:0035355 Toll-like receptor 2-Toll-like receptor 6 protein complex;GO:0030670 phagocytic vesicle membrane	GO:0042497 triacyl lipopeptide binding;GO:0001875 lipopolysaccharide immune receptor activity;GO:0071723 lipopeptide binding	0	1	1	1	1	1	0	0	0	1	1	0	1	0	0	0	1	1	1	0
CCL20	6364	symbol	H. sapiens	6364	H. sapiens	CCL20	C-C motif chemokine ligand 20	GO:0072679 thymocyte migration;GO:0035584 calcium-mediated signaling using intracellular calcium source;GO:0072678 T cell migration	GO:0005615 extracellular space;GO:0005576 extracellular region;GO:0110165 cellular anatomical entity	GO:0031731 CCR6 chemokine receptor binding;GO:0048020 CCR chemokine receptor binding;GO:0008009 chemokine activity	1	1	0	1	0	0	0	0	1	0	0	0	0	0	0	0	0	0	0	0
NGF	4803	symbol	H. sapiens	4803	H. sapiens	NGF	nerve growth factor	GO:0048672 positive regulation of collateral sprouting;GO:0038180 nerve growth factor signaling pathway;GO:0048670 regulation of collateral sprouting	GO:0031904 endosome lumen;GO:0005796 Golgi lumen;GO:0008021 synaptic vesicle	GO:0005163 nerve growth factor receptor binding;GO:0005165 neurotrophin receptor binding;GO:0008191 metalloendopeptidase inhibitor activity	1	1	0	0	0	1	0	0	1	0	1	1	0	0	1	0	0	0	0	0
CRHR1	1394	symbol	H. sapiens	1394	H. sapiens	CRHR1	corticotropin releasing hormone receptor 1	GO:0010578 regulation of adenylate cyclase activity involved in G protein-coupled receptor signaling pathway;GO:0051458 corticotropin secretion;GO:2000852 regulation of corticosterone secretion	GO:0005768 endosome;GO:0043005 neuron projection;GO:0005887 integral component of plasma membrane	GO:0051424 corticotropin-releasing hormone binding;GO:0015056 corticotrophin-releasing factor receptor activity;GO:0043404 corticotropin-releasing hormone receptor activity	0	0	0	0	0	0	0	0	0	1	0	0	0	0	0	0	1	0	0	0
CD22	933	symbol	H. sapiens	933	H. sapiens	CD22	CD22 molecule	GO:0050859 negative regulation of B cell receptor signaling pathway;GO:0002638 negative regulation of immunoglobulin production;GO:0050849 negative regulation of calcium-mediated signaling	GO:0032809 neuronal cell body membrane;GO:0044298 cell body membrane;GO:0055037 recycling endosome	GO:0001791 IgM binding;GO:0042609 CD4 receptor binding;GO:0033691 sialic acid binding	0	0	0	0	1	1	1	1	0	0	0	0	0	0	0	0	0	0	0	0
ADM2	79924	symbol	H. sapiens	79924	H. sapiens	ADM2	adrenomedullin 2	GO:0010460 positive regulation of heart rate;GO:0045823 positive regulation of heart contraction;GO:1903524 positive regulation of blood circulation	GO:0005576 extracellular region;GO:0110165 cellular anatomical entity;GO:0005575 cellular_component	GO:0005179 hormone activity;GO:0048018 receptor ligand activity;GO:0030546 signaling receptor activator activity	1	0	0	0	0	0	0	0	0	0	0	0	1	0	0	0	0	0	0	1
EBI3	10148	symbol	H. sapiens	10148	H. sapiens	EBI3	Epstein-Barr virus induced 3	GO:0033210 leptin-mediated signaling pathway;GO:0044320 cellular response to leptin stimulus;GO:0042088 T-helper 1 type immune response	GO:0005788 endoplasmic reticulum lumen;GO:0009897 external side of plasma membrane;GO:0043235 receptor complex	GO:0045523 interleukin-27 receptor binding;GO:0017046 peptide hormone binding;GO:0042562 hormone binding	1	1	0	1	1	0	0	1	0	1	0	0	0	1	0	0	0	1	0	0
HLA-B	3106	symbol	H. sapiens	3106	H. sapiens	HLA-B	major histocompatibility complex, class I, B	GO:0042270 protection from natural killer cell mediated cytotoxicity;GO:0002484 antigen processing and presentation of endogenous peptide antigen via MHC class I via ER pathway;GO:0002486 antigen processing and presentation of endogenous peptide antigen via MHC class I via ER pathway, TAP-independent	GO:0042612 MHC class I protein complex;GO:0042611 MHC protein complex;GO:0071556 integral component of lumenal side of endoplasmic reticulum membrane	GO:0046977 TAP binding;GO:0042605 peptide antigen binding;GO:0051087 chaperone binding	0	1	1	1	0	1	1	0	0	1	0	0	0	0	0	0	0	1	0	0
CXCL8	3576	symbol	H. sapiens	3576	H. sapiens	CXCL8	C-X-C motif chemokine ligand 8	GO:2000535 regulation of entry of bacterium into host cell;GO:0050930 induction of positive chemotaxis;GO:0060354 negative regulation of cell adhesion molecule production	GO:0005615 extracellular space;GO:0005576 extracellular region;GO:0110165 cellular anatomical entity	GO:0005153 interleukin-8 receptor binding;GO:0045236 CXCR chemokine receptor binding;GO:0008009 chemokine activity	1	1	1	0	1	0	0	1	0	0	1	1	1	1	0	0	0	0	1	1
STC1	6781	symbol	H. sapiens	6781	H. sapiens	STC1	stanniocalcin 1	GO:0003421 growth plate cartilage axis specification;GO:1903403 negative regulation of renal phosphate excretion;GO:0003422 growth plate cartilage morphogenesis	GO:0016324 apical plasma membrane;GO:0045177 apical part of cell;GO:0098590 plasma membrane region	GO:0005179 hormone activity;GO:0048018 receptor ligand activity;GO:0030546 signaling receptor activator activity	1	1	0	0	0	0	0	0	0	0	0	0	1	0	0	0	1	0	0	0
GBP2	2634	symbol	H. sapiens	2634	H. sapiens	GBP2	guanylate binding protein 2	GO:0042832 defense response to protozoan;GO:0001562 response to protozoan;GO:0071347 cellular response to interleukin-1	GO:0000139 Golgi membrane;GO:0048471 perinuclear region of cytoplasm;GO:0005794 Golgi apparatus	GO:0003924 GTPase activity;GO:0005525 GTP binding;GO:0019001 guanyl nucleotide binding	0	1	0	1	0	1	0	0	0	0	0	0	0	0	0	0	0	0	0	0
SAA2	6289	symbol	H. sapiens	6289	H. sapiens	SAA2	serum amyloid A2	GO:0006953 acute-phase response;GO:0002526 acute inflammatory response;GO:0006954 inflammatory response	GO:0034364 high-density lipoprotein particle;GO:0034358 plasma lipoprotein particle;GO:1990777 lipoprotein particle	GO:0005515 protein binding;GO:0005488 binding;GO:0003674 molecular_function	0	1	0	0	0	0	0	0	0	0	0	0	0	0	0	0	0	0	0	0
ACVRL1	94	symbol	H. sapiens	94	H. sapiens	ACVRL1	activin A receptor like type 1	GO:0002043 blood vessel endothelial cell proliferation involved in sprouting angiogenesis;GO:0060836 lymphatic endothelial cell differentiation;GO:0001955 blood vessel maturation	GO:0070724 BMP receptor complex;GO:0098802 plasma membrane signaling receptor complex;GO:0043025 neuronal cell body	GO:0005025 transforming growth factor beta receptor activity, type I;GO:0016361 activin receptor activity, type I;GO:0098821 BMP receptor activity	0	0	0	0	0	0	0	1	1	0	1	1	1	0	0	0	0	1	0	1
DLL4	54567	symbol	H. sapiens	54567	H. sapiens	DLL4	delta like canonical Notch ligand 4	GO:0072554 blood vessel lumenization;GO:0061074 regulation of neural retina development;GO:0035912 dorsal aorta morphogenesis	GO:0016021 integral component of membrane;GO:0031224 intrinsic component of membrane;GO:0005886 plasma membrane	GO:0005112 Notch binding;GO:0005509 calcium ion binding;GO:0005102 signaling receptor binding	0	0	0	0	1	0	0	0	0	0	1	1	1	0	0	0	0	0	0	0
ADRB2	154	symbol	H. sapiens	154	H. sapiens	ADRB2	adrenoceptor beta 2	GO:0002032 desensitization of G protein-coupled receptor signaling pathway by arrestin;GO:0061885 positive regulation of mini excitatory postsynaptic potential;GO:0002025 norepinephrine-epinephrine-mediated vasodilation involved in regulation of systemic arterial blood pressure	GO:0030669 clathrin-coated endocytic vesicle membrane;GO:0045334 clathrin-coated endocytic vesicle;GO:0030665 clathrin-coated vesicle membrane	GO:0004941 beta2-adrenergic receptor activity;GO:0004939 beta-adrenergic receptor activity;GO:0051380 norepinephrine binding	0	0	0	1	0	1	0	0	1	1	0	1	0	0	0	0	0	1	0	0
NFKBIZ	64332	symbol	H. sapiens	64332	H. sapiens	NFKBIZ	NFKB inhibitor zeta	GO:2000321 positive regulation of T-helper 17 cell differentiation;GO:2000318 positive regulation of T-helper 17 type immune response;GO:2000319 regulation of T-helper 17 cell differentiation	GO:0036464 cytoplasmic ribonucleoprotein granule;GO:0035770 ribonucleoprotein granule;GO:0016607 nuclear speck	GO:0005515 protein binding;GO:0005488 binding;GO:0003674 molecular_function	0	1	1	0	0	1	0	1	0	0	0	0	0	0	0	0	0	0	0	0
RORA	6095	symbol	H. sapiens	6095	H. sapiens	RORA	RAR related orphan receptor A	GO:0021534 cell proliferation in hindbrain;GO:0021924 cell proliferation in external granule layer;GO:0021930 cerebellar granule cell precursor proliferation	GO:0000785 chromatin;GO:0005730 nucleolus;GO:0005694 chromosome	GO:0008142 oxysterol binding;GO:0001223 transcription coactivator binding;GO:0001222 transcription corepressor binding	0	1	1	1	1	0	1	1	0	0	0	0	1	0	0	0	0	0	0	0
HLA-F	3134	symbol	H. sapiens	3134	H. sapiens	HLA-F	major histocompatibility complex, class I, F	GO:0043322 negative regulation of natural killer cell degranulation;GO:0002728 negative regulation of natural killer cell cytokine production;GO:0002477 antigen processing and presentation of exogenous peptide antigen via MHC class Ib	GO:0032398 MHC class Ib protein complex;GO:0042612 MHC class I protein complex;GO:0042611 MHC protein complex	GO:0046979 TAP2 binding;GO:0046978 TAP1 binding;GO:0030881 beta-2-microglobulin binding	0	0	1	1	0	1	1	1	0	1	0	0	0	0	0	0	1	1	0	0
CXCL2	2920	symbol	H. sapiens	2920	H. sapiens	CXCL2	C-X-C motif chemokine ligand 2	GO:0061844 antimicrobial humoral immune response mediated by antimicrobial peptide;GO:0030593 neutrophil chemotaxis;GO:0070098 chemokine-mediated signaling pathway	GO:0005615 extracellular space;GO:0005576 extracellular region;GO:0110165 cellular anatomical entity	GO:0045236 CXCR chemokine receptor binding;GO:0008009 chemokine activity;GO:0042379 chemokine receptor binding	1	1	0	0	0	0	0	0	0	0	0	0	0	1	0	0	0	0	0	0
CCL5	6352	symbol	H. sapiens	6352	H. sapiens	CCL5	C-C motif chemokine ligand 5	GO:2000503 positive regulation of natural killer cell chemotaxis;GO:0031584 activation of phospholipase D activity;GO:0033634 positive regulation of cell-cell adhesion mediated by integrin	GO:0005615 extracellular space;GO:0005576 extracellular region;GO:0110165 cellular anatomical entity	GO:0046817 chemokine receptor antagonist activity;GO:0031729 CCR4 chemokine receptor binding;GO:0030298 receptor signaling protein tyrosine kinase activator activity	1	1	1	0	1	1	1	1	1	0	0	1	0	0	0	0	1	0	1	0
IL32	9235	symbol	H. sapiens	9235	H. sapiens	IL32	interleukin 32	GO:0007155 cell adhesion;GO:0006952 defense response;GO:0006955 immune response	GO:0005615 extracellular space;GO:0005576 extracellular region;GO:0005829 cytosol	GO:0005125 cytokine activity;GO:0048018 receptor ligand activity;GO:0030546 signaling receptor activator activity	1	1	0	0	0	0	0	0	0	0	0	0	0	0	0	0	0	0	0	0
NGFR	4804	symbol	H. sapiens	4804	H. sapiens	NGFR	nerve growth factor receptor	GO:0042488 positive regulation of odontogenesis of dentin-containing tooth;GO:0042482 positive regulation of odontogenesis;GO:0051799 negative regulation of hair follicle development	GO:0043204 perikaryon;GO:0030426 growth cone;GO:0030427 site of polarized growth	GO:0048406 nerve growth factor binding;GO:0043121 neurotrophin binding;GO:0005035 death receptor activity	0	1	0	0	0	0	0	0	0	1	1	0	1	0	1	0	1	0	0	0
MX2	4600	symbol	H. sapiens	4600	H. sapiens	MX2	MX dynamin like GTPase 2	GO:0035455 response to interferon-alpha;GO:0046822 regulation of nucleocytoplasmic transport;GO:0051028 mRNA transport	GO:0005643 nuclear pore;GO:0005874 microtubule;GO:0005635 nuclear envelope	GO:0008017 microtubule binding;GO:0003924 GTPase activity;GO:0015631 tubulin binding	0	0	0	0	0	0	0	0	0	0	0	0	0	0	0	0	0	0	0	0
INS-IGF2	723961	symbol	H. sapiens	723961	H. sapiens	INS-IGF2	INS-IGF2 readthrough	GO:0007165 signal transduction;GO:0023052 signaling;GO:0007154 cell communication	GO:0005615 extracellular space;GO:0005576 extracellular region;GO:0110165 cellular anatomical entity	GO:0005179 hormone activity;GO:0048018 receptor ligand activity;GO:0030546 signaling receptor activator activity	1	0	0	0	0	0	0	0	0	0	0	0	0	0	0	0	0	0	0	0
SEMA7A	8482	symbol	H. sapiens	8482	H. sapiens	SEMA7A	semaphorin 7A (John Milton Hagen blood group)	GO:0060907 positive regulation of macrophage cytokine production;GO:0010935 regulation of macrophage cytokine production;GO:0061081 positive regulation of myeloid leukocyte cytokine production involved in immune response	GO:0031225 anchored component of membrane;GO:0062023 collagen-containing extracellular matrix;GO:0009897 external side of plasma membrane	GO:0030215 semaphorin receptor binding;GO:0045499 chemorepellent activity;GO:0005178 integrin binding	1	1	1	1	0	1	1	0	1	0	0	0	0	0	0	0	0	0	0	0
JUN	3725	symbol	H. sapiens	3725	H. sapiens	JUN	Jun proto-oncogene, AP-1 transcription factor subunit	GO:0035026 leading edge cell differentiation;GO:0072740 cellular response to anisomycin;GO:0072739 response to anisomycin	GO:0035976 transcription factor AP-1 complex;GO:0000791 euchromatin;GO:0017053 transcription repressor complex	GO:0035497 cAMP response element binding;GO:0070412 R-SMAD binding;GO:0140296 general transcription initiation factor binding	0	1	1	0	1	0	0	0	1	0	1	1	1	0	0	0	0	0	1	0
NOD2	64127	symbol	H. sapiens	64127	H. sapiens	NOD2	nucleotide binding oligomerization domain containing 2	GO:0002805 regulation of antimicrobial peptide biosynthetic process;GO:0002807 positive regulation of antimicrobial peptide biosynthetic process;GO:0002808 regulation of antibacterial peptide biosynthetic process	GO:0046658 anchored component of plasma membrane;GO:0045335 phagocytic vesicle;GO:0031225 anchored component of membrane	GO:0032500 muramyl dipeptide binding;GO:0050700 CARD domain binding;GO:0042834 peptidoglycan binding	0	1	1	1	0	1	1	1	1	1	0	0	0	0	0	0	0	0	0	0
SEMA4B	10509	symbol	H. sapiens	10509	H. sapiens	SEMA4B	semaphorin 4B	GO:0048843 negative regulation of axon extension involved in axon guidance;GO:0048841 regulation of axon extension involved in axon guidance;GO:0071526 semaphorin-plexin signaling pathway	GO:0045202 synapse;GO:0005887 integral component of plasma membrane;GO:0031226 intrinsic component of plasma membrane	GO:0030215 semaphorin receptor binding;GO:0045499 chemorepellent activity;GO:0048018 receptor ligand activity	1	1	0	0	0	0	1	0	0	0	0	0	0	0	0	0	0	0	0	0
LCN2	3934	symbol	H. sapiens	3934	H. sapiens	LCN2	lipocalin 2	GO:0015891 siderophore transport;GO:0097577 sequestering of iron ion;GO:0051238 sequestering of metal ion	GO:0035580 specific granule lumen;GO:0042581 specific granule;GO:0034774 secretory granule lumen	GO:1903981 enterobactin binding;GO:0005527 macrolide binding;GO:0005506 iron ion binding	0	1	0	1	0	0	0	0	0	0	0	0	0	0	0	1	0	0	0	0
CXCL1	2919	symbol	H. sapiens	2919	H. sapiens	CXCL1	C-X-C motif chemokine ligand 1	GO:0061844 antimicrobial humoral immune response mediated by antimicrobial peptide;GO:0030593 neutrophil chemotaxis;GO:0070098 chemokine-mediated signaling pathway	GO:1904724 tertiary granule lumen;GO:0035580 specific granule lumen;GO:0042581 specific granule	GO:0045236 CXCR chemokine receptor binding;GO:0008009 chemokine activity;GO:0042379 chemokine receptor binding	1	1	0	0	0	0	0	0	0	0	1	0	0	1	0	1	0	0	0	0
TNFRSF9	3604	symbol	H. sapiens	3604	H. sapiens	TNFRSF9	TNF receptor superfamily member 9	GO:0008285 negative regulation of cell population proliferation;GO:0006915 apoptotic process;GO:0012501 programmed cell death	GO:0009897 external side of plasma membrane;GO:0098552 side of membrane;GO:0009986 cell surface	GO:0019955 cytokine binding;GO:0038023 signaling receptor activity;GO:0060089 molecular transducer activity	0	0	0	0	0	0	0	0	0	0	1	0	0	0	0	0	0	0	0	0
LRP1	4035	symbol	H. sapiens	4035	H. sapiens	LRP1	LDL receptor related protein 1	GO:1904298 regulation of transcytosis;GO:1904300 positive regulation of transcytosis;GO:0002265 astrocyte activation involved in immune response	GO:0005905 clathrin-coated pit;GO:0030666 endocytic vesicle membrane;GO:0016323 basolateral plasma membrane	GO:0016964 alpha-2 macroglobulin receptor activity;GO:0030226 apolipoprotein receptor activity;GO:0032050 clathrin heavy chain binding	0	1	0	1	1	1	0	0	0	1	0	1	1	0	1	0	1	1	1	0
PTAFR	5724	symbol	H. sapiens	5724	H. sapiens	PTAFR	platelet activating factor receptor	GO:0071258 cellular response to gravity;GO:1904301 regulation of maternal process involved in parturition;GO:1904303 positive regulation of maternal process involved in parturition	GO:0070821 tertiary granule membrane;GO:0070820 tertiary granule;GO:0030667 secretory granule membrane	GO:0004992 platelet activating factor receptor activity;GO:0001875 lipopolysaccharide immune receptor activity;GO:0045028 G protein-coupled purinergic nucleotide receptor activity	0	1	0	1	0	1	0	1	0	0	0	0	0	0	0	1	1	0	0	0
EDN2	1907	symbol	H. sapiens	1907	H. sapiens	EDN2	endothelin 2	GO:0003058 hormonal regulation of the force of heart contraction;GO:0009932 cell tip growth;GO:0003099 positive regulation of the force of heart contraction by chemical signal	GO:0005615 extracellular space;GO:0005576 extracellular region;GO:0110165 cellular anatomical entity	GO:0031708 endothelin B receptor binding;GO:0031705 bombesin receptor binding;GO:0071855 neuropeptide receptor binding	1	1	1	1	1	0	0	0	0	0	0	0	1	0	0	0	0	0	1	0
RELB	5971	symbol	H. sapiens	5971	H. sapiens	RELB	RELB proto-oncogene, NF-kB subunit	GO:0045063 T-helper 1 cell differentiation;GO:0032688 negative regulation of interferon-beta production;GO:0042088 T-helper 1 type immune response	GO:0071159 NF-kappaB complex;GO:0017053 transcription repressor complex;GO:0005667 transcription regulator complex	GO:0019901 protein kinase binding;GO:0019900 kinase binding;GO:0000978 RNA polymerase II cis-regulatory region sequence-specific DNA binding	0	1	0	0	1	1	0	0	0	0	0	0	0	0	0	0	0	0	1	0
IL31RA	133396	symbol	H. sapiens	133396	H. sapiens	IL31RA	interleukin 31 receptor A	GO:0002438 acute inflammatory response to antigenic stimulus;GO:0030224 monocyte differentiation;GO:0043031 negative regulation of macrophage activation	GO:0042734 presynaptic membrane;GO:0097060 synaptic membrane;GO:0009897 external side of plasma membrane	GO:0051916 granulocyte colony-stimulating factor binding;GO:0004896 cytokine receptor activity;GO:0019955 cytokine binding	0	1	0	0	1	0	1	1	1	0	0	1	0	0	0	0	0	1	0	0
SLPI	6590	symbol	H. sapiens	6590	H. sapiens	SLPI	secretory leukocyte peptidase inhibitor	GO:0035821 modulation of process of another organism;GO:0019731 antibacterial humoral response;GO:0045071 negative regulation of viral genome replication	GO:0035580 specific granule lumen;GO:0042581 specific granule;GO:0034774 secretory granule lumen	GO:0004867 serine-type endopeptidase inhibitor activity;GO:0004866 endopeptidase inhibitor activity;GO:0030414 peptidase inhibitor activity	0	1	0	1	0	0	0	0	0	0	0	0	0	1	1	1	0	0	0	0
IL1B	3553	symbol	H. sapiens	3553	H. sapiens	IL1B	interleukin 1 beta	GO:1903597 negative regulation of gap junction assembly;GO:0035504 regulation of myosin light chain kinase activity;GO:0035505 positive regulation of myosin light chain kinase activity	GO:0000323 lytic vacuole;GO:0005764 lysosome;GO:0005773 vacuole	GO:0005149 interleukin-1 receptor binding;GO:0070851 growth factor receptor binding;GO:0005178 integrin binding	1	1	1	1	1	1	1	1	1	0	1	0	1	0	1	0	1	0	1	1
OXTR	5021	symbol	H. sapiens	5021	H. sapiens	OXTR	oxytocin receptor	GO:0034059 response to anoxia;GO:0010701 positive regulation of norepinephrine secretion;GO:0001992 regulation of systemic arterial blood pressure by vasopressin	GO:0005902 microvillus;GO:0005912 adherens junction;GO:0098858 actin-based cell projection	GO:0004990 oxytocin receptor activity;GO:0005000 vasopressin receptor activity;GO:0017046 peptide hormone binding	0	0	0	0	0	0	0	0	1	1	0	0	1	0	0	0	1	0	1	0
FGFR2	2263	symbol	H. sapiens	2263	H. sapiens	FGFR2	fibroblast growth factor receptor 2	GO:0035602 fibroblast growth factor receptor signaling pathway involved in negative regulation of apoptotic process in bone marrow cell;GO:0035603 fibroblast growth factor receptor signaling pathway involved in hemopoiesis;GO:0035604 fibroblast growth factor receptor signaling pathway involved in positive regulation of cell proliferation in bone marrow	GO:0060076 excitatory synapse;GO:0005938 cell cortex;GO:0062023 collagen-containing extracellular matrix	GO:0005007 fibroblast growth factor receptor activity;GO:0017134 fibroblast growth factor binding;GO:0004714 transmembrane receptor protein tyrosine kinase activity	0	1	0	0	1	0	0	0	1	0	1	1	1	0	0	0	0	1	0	0
IL1RAP	3556	symbol	H. sapiens	3556	H. sapiens	IL1RAP	interleukin 1 receptor accessory protein	GO:0038172 interleukin-33-mediated signaling pathway;GO:0099545 trans-synaptic signaling by trans-synaptic complex;GO:0099151 regulation of postsynaptic density assembly	GO:0098978 glutamatergic synapse;GO:0045202 synapse;GO:0005887 integral component of plasma membrane	GO:0002114 interleukin-33 receptor activity;GO:0004908 interleukin-1 receptor activity;GO:0050135 NAD(P)+ nucleosidase activity	0	1	0	1	0	0	0	0	0	0	0	0	0	0	0	0	0	0	1	0
VGF	7425	symbol	H. sapiens	7425	H. sapiens	VGF	VGF nerve growth factor inducible	GO:0043084 penile erection;GO:0007620 copulation;GO:0002021 response to dietary excess	GO:0005788 endoplasmic reticulum lumen;GO:0030667 secretory granule membrane;GO:0030133 transport vesicle	GO:0005184 neuropeptide hormone activity;GO:0005179 hormone activity;GO:0008083 growth factor activity	1	1	0	1	0	1	0	0	0	0	0	0	0	0	0	0	1	0	0	0
NFKBIA	4792	symbol	H. sapiens	4792	H. sapiens	NFKBIA	NFKB inhibitor alpha	GO:0070427 nucleotide-binding oligomerization domain containing 1 signaling pathway;GO:0007253 cytoplasmic sequestering of NF-kappaB;GO:0070431 nucleotide-binding oligomerization domain containing 2 signaling pathway	GO:0033256 I-kappaB/NF-kappaB complex;GO:0140535 intracellular protein-containing complex;GO:0005654 nucleoplasm	GO:0008139 nuclear localization sequence binding;GO:0051059 NF-kappaB binding;GO:0005048 signal sequence binding	0	1	1	1	0	0	0	0	0	1	0	0	0	0	0	0	0	0	1	0
RAC2	5880	symbol	H. sapiens	5880	H. sapiens	RAC2	Rac family small GTPase 2	GO:0071593 lymphocyte aggregation;GO:0060753 regulation of mast cell chemotaxis;GO:0070486 leukocyte aggregation	GO:0043020 NADPH oxidase complex;GO:0030670 phagocytic vesicle membrane;GO:0005884 actin filament	GO:0019887 protein kinase regulator activity;GO:0019207 kinase regulator activity;GO:0003924 GTPase activity	0	1	1	0	0	1	0	1	0	0	0	0	0	0	0	0	1	1	0	0
VDR	7421	symbol	H. sapiens	7421	H. sapiens	VDR	vitamin D receptor	GO:0060058 positive regulation of apoptotic process involved in mammary gland involution;GO:0070561 vitamin D receptor signaling pathway;GO:0010979 regulation of vitamin D 24-hydroxylase activity	GO:0090575 RNA polymerase II transcription regulator complex;GO:0005667 transcription regulator complex;GO:0043235 receptor complex	GO:0038186 lithocholic acid receptor activity;GO:1902098 calcitriol binding;GO:1902121 lithocholic acid binding	0	1	0	1	1	0	0	0	0	0	1	0	1	0	0	0	0	1	0	0
PML	5371	symbol	H. sapiens	5371	H. sapiens	PML	PML nuclear body scaffold	GO:0090402 oncogene-induced cell senescence;GO:0007182 common-partner SMAD protein phosphorylation;GO:0030578 PML body organization	GO:0042406 extrinsic component of endoplasmic reticulum membrane;GO:0031312 extrinsic component of organelle membrane;GO:0000792 heterochromatin	GO:0140037 sumo-dependent protein binding;GO:0140035 ubiquitination-like modification-dependent protein binding;GO:0032183 SUMO binding	0	1	0	1	1	1	0	1	0	0	1	1	1	0	1	0	0	0	0	1
OLR1	4973	symbol	H. sapiens	4973	H. sapiens	OLR1	oxidized low density lipoprotein receptor 1	GO:0007159 leukocyte cell-cell adhesion;GO:0042157 lipoprotein metabolic process;GO:0008015 blood circulation	GO:0070821 tertiary granule membrane;GO:0035579 specific granule membrane;GO:0042581 specific granule	GO:0005041 low-density lipoprotein particle receptor activity;GO:0030228 lipoprotein particle receptor activity;GO:0038024 cargo receptor activity	0	1	0	0	0	0	0	0	0	0	0	0	0	0	0	1	0	1	0	0
TYMP	1890	symbol	H. sapiens	1890	H. sapiens	TYMP	thymidine phosphorylase	GO:0046074 dTMP catabolic process;GO:1905333 regulation of gastric motility;GO:0046073 dTMP metabolic process	GO:0005829 cytosol;GO:0005737 cytoplasm;GO:0005622 intracellular anatomical structure	GO:0016154 pyrimidine-nucleoside phosphorylase activity;GO:0009032 thymidine phosphorylase activity;GO:0004645 1,4-alpha-oligoglucan phosphorylase activity	1	1	0	0	0	0	0	0	0	0	0	0	1	0	0	0	0	0	0	0
PTX3	5806	symbol	H. sapiens	5806	H. sapiens	PTX3	pentraxin 3	GO:0044866 modulation by host of viral exo-alpha-sialidase activity;GO:0044867 modulation by host of viral catalytic activity;GO:0044869 negative regulation by host of viral exo-alpha-sialidase activity	GO:1904724 tertiary granule lumen;GO:0035580 specific granule lumen;GO:0042581 specific granule	GO:0001872 (1->3)-beta-D-glucan binding;GO:0001849 complement component C1q complex binding;GO:0046790 virion binding	0	1	0	0	0	0	0	0	0	0	0	0	0	0	1	1	0	0	0	0
HLA-H	3136	symbol	H. sapiens	3136	H. sapiens	HLA-H	major histocompatibility complex, class I, H (pseudogene)	GO:0002476 antigen processing and presentation of endogenous peptide antigen via MHC class Ib;GO:0002428 antigen processing and presentation of peptide antigen via MHC class Ib;GO:0002484 antigen processing and presentation of endogenous peptide antigen via MHC class I via ER pathway	GO:0042612 MHC class I protein complex;GO:0042611 MHC protein complex;GO:0071556 integral component of lumenal side of endoplasmic reticulum membrane	GO:0030881 beta-2-microglobulin binding;GO:0042605 peptide antigen binding;GO:0003823 antigen binding	0	0	0	0	0	1	0	0	0	1	0	0	0	0	0	0	0	1	0	0
PTGS2	5743	symbol	H. sapiens	5743	H. sapiens	PTGS2	prostaglandin-endoperoxide synthase 2	GO:0010335 response to non-ionic osmotic stress;GO:0071471 cellular response to non-ionic osmotic stress;GO:0032227 negative regulation of synaptic transmission, dopaminergic	GO:0005640 nuclear outer membrane;GO:0005637 nuclear inner membrane;GO:0005901 caveola	GO:0004666 prostaglandin-endoperoxide synthase activity;GO:0016702 oxidoreductase activity, acting on single donors with incorporation of molecular oxygen, incorporation of two atoms of oxygen;GO:0016701 oxidoreductase activity, acting on single donors with incorporation of molecular oxygen	0	1	1	1	0	0	0	0	1	0	1	0	1	0	1	0	1	0	0	0
DHX58	79132	symbol	H. sapiens	79132	H. sapiens	DHX58	DExH-box helicase 58	GO:0039534 negative regulation of MDA-5 signaling pathway;GO:1900245 positive regulation of MDA-5 signaling pathway;GO:0039533 regulation of MDA-5 signaling pathway	GO:0005737 cytoplasm;GO:0005622 intracellular anatomical structure;GO:0110165 cellular anatomical entity	GO:0003725 double-stranded RNA binding;GO:0003724 RNA helicase activity;GO:0008186 ATP-dependent activity, acting on RNA	0	1	1	1	0	1	1	0	0	0	0	0	0	0	0	0	0	0	0	0
CXCL3	2921	symbol	H. sapiens	2921	H. sapiens	CXCL3	C-X-C motif chemokine ligand 3	GO:0061844 antimicrobial humoral immune response mediated by antimicrobial peptide;GO:0030593 neutrophil chemotaxis;GO:0070098 chemokine-mediated signaling pathway	GO:0005615 extracellular space;GO:0005576 extracellular region;GO:0110165 cellular anatomical entity	GO:0045236 CXCR chemokine receptor binding;GO:0008009 chemokine activity;GO:0042379 chemokine receptor binding	1	1	0	0	0	0	0	0	0	0	0	0	0	1	0	0	0	0	0	0
EGFR	1956	symbol	H. sapiens	1956	H. sapiens	EGFR	epidermal growth factor receptor	GO:0010750 positive regulation of nitric oxide mediated signal transduction;GO:1900019 regulation of protein kinase C activity;GO:1900020 positive regulation of protein kinase C activity	GO:0097489 multivesicular body, internal vesicle lumen;GO:0070435 Shc-EGFR complex;GO:0097487 multivesicular body, internal vesicle	GO:0005006 epidermal growth factor receptor activity;GO:0048408 epidermal growth factor binding;GO:0030235 nitric-oxide synthase regulator activity	0	1	0	1	0	1	0	0	1	0	0	1	1	0	0	1	1	1	0	0
PGF	5228	symbol	H. sapiens	5228	H. sapiens	PGF	placental growth factor	GO:0060754 positive regulation of mast cell chemotaxis;GO:0060753 regulation of mast cell chemotaxis;GO:0050930 induction of positive chemotaxis	GO:0005615 extracellular space;GO:0005576 extracellular region;GO:0016020 membrane	GO:0005172 vascular endothelial growth factor receptor binding;GO:0042056 chemoattractant activity;GO:0070851 growth factor receptor binding	1	1	1	0	0	0	0	0	1	0	0	1	1	0	0	0	0	0	0	1
ADRB1	153	symbol	H. sapiens	153	H. sapiens	ADRB1	adrenoceptor beta 1	GO:0001997 positive regulation of the force of heart contraction by epinephrine-norepinephrine;GO:0003099 positive regulation of the force of heart contraction by chemical signal;GO:0002025 norepinephrine-epinephrine-mediated vasodilation involved in regulation of systemic arterial blood pressure	GO:0098685 Schaffer collateral - CA1 synapse;GO:0005769 early endosome;GO:0005768 endosome	GO:0004940 beta1-adrenergic receptor activity;GO:0099579 G protein-coupled neurotransmitter receptor activity involved in regulation of postsynaptic membrane potential;GO:0004939 beta-adrenergic receptor activity	0	1	0	0	0	1	0	0	0	0	0	0	0	0	0	0	0	0	0	0
ARG2	384	symbol	H. sapiens	384	H. sapiens	ARG2	arginase 2	GO:0071643 regulation of chemokine (C-C motif) ligand 4 production;GO:0071644 negative regulation of chemokine (C-C motif) ligand 4 production;GO:0019547 arginine catabolic process to ornithine	GO:0005759 mitochondrial matrix;GO:0005739 mitochondrion;GO:0031974 membrane-enclosed lumen	GO:0004053 arginase activity;GO:0016813 hydrolase activity, acting on carbon-nitrogen (but not peptide) bonds, in linear amidines;GO:0030145 manganese ion binding	0	0	1	1	0	0	1	1	0	0	1	0	0	0	0	0	0	0	0	0
ICAM1	3383	symbol	H. sapiens	3383	H. sapiens	ICAM1	intercellular adhesion molecule 1	GO:0002291 T cell activation via T cell receptor contact with antigen bound to MHC molecule on antigen presenting cell;GO:0002457 T cell antigen processing and presentation;GO:0022614 membrane to membrane docking	GO:0001772 immunological synapse;GO:0045121 membrane raft;GO:0098857 membrane microdomain	GO:0001618 virus receptor activity;GO:0140272 exogenous protein binding;GO:0005178 integrin binding	0	1	0	0	1	1	0	0	1	0	0	0	0	0	0	0	0	0	0	0
IKBKE	9641	symbol	H. sapiens	9641	H. sapiens	IKBKE	inhibitor of nuclear factor kappa B kinase subunit epsilon	GO:0097396 response to interleukin-17;GO:0097398 cellular response to interleukin-17;GO:0097400 interleukin-17-mediated signaling pathway	GO:0016605 PML body;GO:1902554 serine/threonine protein kinase complex;GO:1902911 protein kinase complex	GO:0008384 IkappaB kinase activity;GO:0004704 NF-kappaB-inducing kinase activity;GO:0036435 K48-linked polyubiquitin modification-dependent protein binding	0	1	1	1	0	1	1	0	0	0	0	0	0	0	0	0	0	0	1	0
PLAU	5328	symbol	H. sapiens	5328	H. sapiens	PLAU	plasminogen activator, urokinase	GO:0038195 urokinase plasminogen activator signaling pathway;GO:2000097 regulation of smooth muscle cell-matrix adhesion;GO:0010757 negative regulation of plasminogen activation	GO:0097180 serine protease inhibitor complex;GO:0097179 protease inhibitor complex;GO:1904090 peptidase inhibitor complex	GO:0004252 serine-type endopeptidase activity;GO:0008236 serine-type peptidase activity;GO:0017171 serine hydrolase activity	0	1	1	0	0	0	1	1	0	0	0	0	1	0	1	1	0	0	0	0
PDGFA	5154	symbol	H. sapiens	5154	H. sapiens	PDGFA	platelet derived growth factor subunit A	GO:0060683 regulation of branching involved in salivary gland morphogenesis by epithelial-mesenchymal signaling;GO:0010512 negative regulation of phosphatidylinositol biosynthetic process;GO:0035790 platelet-derived growth factor receptor-alpha signaling pathway	GO:1990265 platelet-derived growth factor complex;GO:0036454 growth factor complex;GO:0031093 platelet alpha granule lumen	GO:0048407 platelet-derived growth factor binding;GO:0005161 platelet-derived growth factor receptor binding;GO:0005518 collagen binding	1	1	0	0	1	1	1	1	1	0	0	1	1	0	0	1	0	0	0	0
STC2	8614	symbol	H. sapiens	8614	H. sapiens	STC2	stanniocalcin 2	GO:0040015 negative regulation of multicellular organism growth;GO:2001256 regulation of store-operated calcium entry;GO:0046885 regulation of hormone biosynthetic process	GO:0005788 endoplasmic reticulum lumen;GO:0048471 perinuclear region of cytoplasm;GO:0005794 Golgi apparatus	GO:0005179 hormone activity;GO:0020037 heme binding;GO:0046906 tetrapyrrole binding	1	0	0	0	0	0	0	0	0	0	0	0	1	0	0	0	1	0	0	0
HLA-C	3107	symbol	H. sapiens	3107	H. sapiens	HLA-C	major histocompatibility complex, class I, C	GO:0002484 antigen processing and presentation of endogenous peptide antigen via MHC class I via ER pathway;GO:0002486 antigen processing and presentation of endogenous peptide antigen via MHC class I via ER pathway, TAP-independent;GO:0019885 antigen processing and presentation of endogenous peptide antigen via MHC class I	GO:0042612 MHC class I protein complex;GO:0042611 MHC protein complex;GO:0071556 integral component of lumenal side of endoplasmic reticulum membrane	GO:0046977 TAP binding;GO:0042605 peptide antigen binding;GO:0003823 antigen binding	0	0	0	0	0	1	0	0	0	1	0	0	0	0	0	0	0	1	0	0
SHC2	25759	symbol	H. sapiens	25759	H. sapiens	SHC2	SHC adaptor protein 2	GO:0007169 transmembrane receptor protein tyrosine kinase signaling pathway;GO:0043410 positive regulation of MAPK cascade;GO:0007167 enzyme-linked receptor protein signaling pathway	GO:0005829 cytosol;GO:0005886 plasma membrane;GO:0071944 cell periphery	GO:0030971 receptor tyrosine kinase binding;GO:1990782 protein tyrosine kinase binding;GO:0019901 protein kinase binding	0	0	0	0	0	0	0	0	1	0	0	1	0	0	0	0	0	0	0	0
ISG15	9636	symbol	H. sapiens	9636	H. sapiens	ISG15	ISG15 ubiquitin like modifier	GO:0032461 positive regulation of protein oligomerization;GO:0032459 regulation of protein oligomerization;GO:0032020 ISG15-protein conjugation	GO:0022627 cytosolic small ribosomal subunit;GO:0015935 small ribosomal subunit;GO:0022626 cytosolic ribosome	GO:0031386 protein tag;GO:0005178 integrin binding;GO:0003735 structural constituent of ribosome	0	1	1	1	0	0	1	1	0	0	0	0	0	0	0	0	0	0	0	0
TLR3	7098	symbol	H. sapiens	7098	H. sapiens	TLR3	toll like receptor 3	GO:0034346 positive regulation of type III interferon production;GO:0034344 regulation of type III interferon production;GO:0009597 detection of virus	GO:0036020 endolysosome membrane;GO:0036019 endolysosome;GO:0005769 early endosome	GO:0003953 NAD+ nucleosidase activity;GO:0016799 hydrolase activity, hydrolyzing N-glycosyl compounds;GO:0003725 double-stranded RNA binding	0	1	1	1	1	1	1	1	1	0	0	0	1	0	0	0	0	0	1	1
LMBR1L	55716	symbol	H. sapiens	55716	H. sapiens	LMBR1L	limb development membrane protein 1 like	GO:0070231 T cell apoptotic process;GO:0060218 hematopoietic stem cell differentiation;GO:0070227 lymphocyte apoptotic process	GO:0005789 endoplasmic reticulum membrane;GO:0098827 endoplasmic reticulum subcompartment;GO:0042175 nuclear outer membrane-endoplasmic reticulum membrane network	GO:0004888 transmembrane signaling receptor activity;GO:0038023 signaling receptor activity;GO:0060089 molecular transducer activity	0	0	0	0	1	0	0	0	0	0	0	0	0	0	0	0	0	0	0	0
IFNLR1	163702	symbol	H. sapiens	163702	H. sapiens	IFNLR1	interferon lambda receptor 1	GO:0038196 type III interferon signaling pathway;GO:0071358 cellular response to type III interferon;GO:0034342 response to type III interferon	GO:0032002 interleukin-28 receptor complex;GO:0098802 plasma membrane signaling receptor complex;GO:0043235 receptor complex	GO:0004896 cytokine receptor activity;GO:0140375 immune receptor activity;GO:0004888 transmembrane signaling receptor activity	0	1	1	0	0	0	1	0	0	0	1	0	0	0	0	0	0	1	0	0
GDF15	9518	symbol	H. sapiens	9518	H. sapiens	GDF15	growth differentiation factor 15	GO:0060400 negative regulation of growth hormone receptor signaling pathway;GO:0060398 regulation of growth hormone receptor signaling pathway;GO:0002023 reduction of food intake in response to dietary excess	GO:0062023 collagen-containing extracellular matrix;GO:0031012 extracellular matrix;GO:0030312 external encapsulating structure	GO:0070700 BMP receptor binding;GO:0070696 transmembrane receptor protein serine/threonine kinase binding;GO:0033612 receptor serine/threonine kinase binding	1	1	0	0	0	0	0	0	1	0	0	1	0	0	0	0	0	0	0	0
IFIH1	64135	symbol	H. sapiens	64135	H. sapiens	IFIH1	interferon induced with helicase C domain 1	GO:0039530 MDA-5 signaling pathway;GO:0034344 regulation of type III interferon production;GO:0009597 detection of virus	GO:0005739 mitochondrion;GO:0005829 cytosol;GO:0005634 nucleus	GO:0003725 double-stranded RNA binding;GO:0003724 RNA helicase activity;GO:0008186 ATP-dependent activity, acting on RNA	0	0	0	1	0	0	0	0	0	0	0	0	0	0	0	0	0	0	1	0
C3	718	symbol	H. sapiens	718	H. sapiens	C3	complement C3	GO:0001798 positive regulation of type IIa hypersensitivity;GO:0002894 positive regulation of type II hypersensitivity;GO:0001970 positive regulation of activation of membrane attack complex	GO:0035578 azurophil granule lumen;GO:0072562 blood microparticle;GO:0005766 primary lysosome	GO:0031714 C5a anaphylatoxin chemotactic receptor binding;GO:0031715 C5L2 anaphylatoxin chemotactic receptor binding;GO:0004866 endopeptidase inhibitor activity	0	1	1	1	0	1	0	0	1	0	0	0	0	1	1	1	0	0	0	1
FAM3C	10447	symbol	H. sapiens	10447	H. sapiens	FAM3C	FAM3 metabolism regulating signaling molecule C	GO:0045721 negative regulation of gluconeogenesis;GO:0010677 negative regulation of cellular carbohydrate metabolic process;GO:0006111 regulation of gluconeogenesis	GO:0031089 platelet dense granule lumen;GO:0042827 platelet dense granule;GO:0034774 secretory granule lumen	GO:0005125 cytokine activity;GO:0048018 receptor ligand activity;GO:0030546 signaling receptor activator activity	1	1	0	0	0	0	0	0	0	0	0	0	0	0	0	1	0	0	0	0
ZYX	7791	symbol	H. sapiens	7791	H. sapiens	ZYX	zyxin	GO:0030038 contractile actin filament bundle assembly;GO:0043149 stress fiber assembly;GO:0051017 actin filament bundle assembly	GO:0001725 stress fiber;GO:0097517 contractile actin filament bundle;GO:0042641 actomyosin	GO:0003723 RNA binding;GO:0046872 metal ion binding;GO:0003676 nucleic acid binding	0	1	1	0	0	1	0	0	0	0	0	1	0	0	0	0	0	0	0	0
HLA-A	3105	symbol	H. sapiens	3105	H. sapiens	HLA-A	major histocompatibility complex, class I, A	GO:0002485 antigen processing and presentation of endogenous peptide antigen via MHC class I via ER pathway, TAP-dependent;GO:2000567 regulation of memory T cell activation;GO:2000568 positive regulation of memory T cell activation	GO:0042824 MHC class I peptide loading complex;GO:0042612 MHC class I protein complex;GO:0005797 Golgi medial cisterna	GO:0062061 TAP complex binding;GO:0042610 CD8 receptor binding;GO:0030881 beta-2-microglobulin binding	0	1	1	1	1	1	1	1	0	1	0	0	0	1	0	0	0	1	0	0
VAV3	10451	symbol	H. sapiens	10451	H. sapiens	VAV3	vav guanine nucleotide exchange factor 3	GO:0002433 immune response-regulating cell surface receptor signaling pathway involved in phagocytosis;GO:0038096 Fc-gamma receptor signaling pathway involved in phagocytosis;GO:0002431 Fc receptor mediated stimulatory signaling pathway	GO:0001772 immunological synapse;GO:0005829 cytosol;GO:0005886 plasma membrane	GO:0005154 epidermal growth factor receptor binding;GO:0070851 growth factor receptor binding;GO:0005085 guanyl-nucleotide exchange factor activity	0	1	0	0	1	1	0	1	1	0	0	0	1	0	0	0	0	0	0	0
MICB	4277	symbol	H. sapiens	4277	H. sapiens	MICB	MHC class I polypeptide-related sequence B	GO:0050689 negative regulation of defense response to virus by host;GO:0046629 gamma-delta T cell activation;GO:0019835 cytolysis	GO:0009897 external side of plasma membrane;GO:0098552 side of membrane;GO:0009986 cell surface	GO:0046703 natural killer cell lectin-like receptor binding;GO:0005102 signaling receptor binding;GO:0005515 protein binding	0	0	1	0	1	1	1	0	0	0	0	0	0	0	0	0	0	0	0	0
NR1H3	10062	symbol	H. sapiens	10062	H. sapiens	NR1H3	nuclear receptor subfamily 1 group H member 3	GO:0090341 negative regulation of secretion of lysosomal enzymes;GO:0090182 regulation of secretion of lysosomal enzymes;GO:0090188 negative regulation of pancreatic juice secretion	GO:0090575 RNA polymerase II transcription regulator complex;GO:0005667 transcription regulator complex;GO:0043235 receptor complex	GO:0032810 sterol response element binding;GO:0015485 cholesterol binding;GO:0004879 nuclear receptor activity	0	1	1	1	1	0	1	1	0	0	0	0	0	0	1	0	1	1	0	0
HDAC1	3065	symbol	H. sapiens	3065	H. sapiens	HDAC1	histone deacetylase 1	GO:0061198 fungiform papilla formation;GO:0060789 hair follicle placode formation;GO:0061197 fungiform papilla morphogenesis	GO:0016581 NuRD complex;GO:0090545 CHD-type complex;GO:0016580 Sin3 complex	GO:0035851 Krueppel-associated box domain binding;GO:0160008 protein decrotonylase activity;GO:0160009 histone decrotonylase activity	0	0	0	1	1	0	0	0	0	0	0	1	0	0	1	0	0	0	0	0
ANXA6	309	symbol	H. sapiens	309	H. sapiens	ANXA6	annexin A6	GO:0003418 growth plate cartilage chondrocyte differentiation;GO:0003413 chondrocyte differentiation involved in endochondral bone morphogenesis;GO:0003417 growth plate cartilage development	GO:0042470 melanosome;GO:0048770 pigment granule;GO:0031902 late endosome membrane	GO:0035374 chondroitin sulfate binding;GO:0015485 cholesterol binding;GO:0005544 calcium-dependent phospholipid binding	0	0	0	0	0	1	0	0	0	0	0	0	0	0	0	0	0	0	0	0
HFE	3077	symbol	H. sapiens	3077	H. sapiens	HFE	homeostatic iron regulator	GO:0002626 negative regulation of T cell antigen processing and presentation;GO:1904282 regulation of antigen processing and presentation of endogenous peptide antigen via MHC class I;GO:1904283 negative regulation of antigen processing and presentation of endogenous peptide antigen via MHC class I	GO:1990712 HFE-transferrin receptor complex;GO:0055037 recycling endosome;GO:0045178 basal part of cell	GO:0030881 beta-2-microglobulin binding;GO:1990459 transferrin receptor binding;GO:0039706 co-receptor binding	0	0	0	0	0	1	1	1	1	0	0	1	0	0	1	0	1	1	0	0
LMBR1	64327	symbol	H. sapiens	64327	H. sapiens	LMBR1	limb development membrane protein 1	GO:0042733 embryonic digit morphogenesis;GO:0030326 embryonic limb morphogenesis;GO:0035113 embryonic appendage morphogenesis	GO:0005887 integral component of plasma membrane;GO:0031226 intrinsic component of plasma membrane;GO:0016021 integral component of membrane	GO:0004888 transmembrane signaling receptor activity;GO:0038023 signaling receptor activity;GO:0060089 molecular transducer activity	0	0	0	0	0	0	0	0	0	0	0	0	0	0	0	0	0	0	0	0
HMGB1	3146	symbol	H. sapiens	3146	H. sapiens	HMGB1	high mobility group box 1	GO:0032072 regulation of restriction endodeoxyribonuclease activity;GO:0017055 negative regulation of RNA polymerase II transcription preinitiation complex assembly;GO:0035711 T-helper 1 cell activation	GO:0035868 alphav-beta3 integrin-HMGB1 complex;GO:0017053 transcription repressor complex;GO:1904813 ficolin-1-rich granule lumen	GO:0019958 C-X-C chemokine binding;GO:0097100 supercoiled DNA binding;GO:0000405 bubble DNA binding	1	1	1	1	1	1	1	1	1	0	0	0	0	0	1	1	0	1	1	0
THBS1	7057	symbol	H. sapiens	7057	H. sapiens	THBS1	thrombospondin 1	GO:0010751 negative regulation of nitric oxide mediated signal transduction;GO:0002581 negative regulation of antigen processing and presentation of peptide or polysaccharide antigen via MHC class II;GO:0010748 negative regulation of long-chain fatty acid import across plasma membrane	GO:0005577 fibrinogen complex;GO:0031093 platelet alpha granule lumen;GO:0016529 sarcoplasmic reticulum	GO:0070052 collagen V binding;GO:0070051 fibrinogen binding;GO:0030169 low-density lipoprotein particle binding	0	1	1	1	0	1	1	1	1	0	1	1	1	0	1	1	0	0	0	1
ITGB2	3689	symbol	H. sapiens	3689	H. sapiens	ITGB2	integrin subunit beta 2	GO:0045914 negative regulation of catecholamine metabolic process;GO:0045963 negative regulation of dopamine metabolic process;GO:2000361 regulation of prostaglandin-E synthase activity	GO:0034687 integrin alphaL-beta2 complex;GO:0034688 integrin alphaM-beta2 complex;GO:0034689 integrin alphaX-beta2 complex	GO:0030369 ICAM-3 receptor activity;GO:0001851 complement component C3b binding;GO:0001846 opsonin binding	0	1	0	0	1	1	0	1	0	1	0	0	0	0	0	1	1	1	1	0
VTN	7448	symbol	H. sapiens	7448	H. sapiens	VTN	vitronectin	GO:0061302 smooth muscle cell-matrix adhesion;GO:0051918 negative regulation of fibrinolysis;GO:0030949 positive regulation of vascular endothelial growth factor receptor signaling pathway	GO:0071062 alphav-beta3 integrin-vitronectin complex;GO:1904090 peptidase inhibitor complex;GO:0098637 protein complex involved in cell-matrix adhesion	GO:0030247 polysaccharide binding;GO:0005044 scavenger receptor activity;GO:0050840 extracellular matrix binding	0	1	1	0	0	0	1	1	1	0	0	0	0	0	1	0	0	1	0	0
UCN	7349	symbol	H. sapiens	7349	H. sapiens	UCN	urocortin	GO:0034199 activation of protein kinase A activity;GO:0035482 gastric motility;GO:0035483 gastric emptying	GO:0043196 varicosity;GO:0044304 main axon;GO:0043679 axon terminus	GO:0046811 histone deacetylase inhibitor activity;GO:0051430 corticotropin-releasing hormone receptor 1 binding;GO:0051431 corticotropin-releasing hormone receptor 2 binding	1	1	1	1	0	0	1	0	1	0	0	0	0	0	1	0	1	0	0	0
GIP	2695	symbol	H. sapiens	2695	H. sapiens	GIP	gastric inhibitory polypeptide	GO:0038192 gastric inhibitory peptide signaling pathway;GO:0070094 positive regulation of glucagon secretion;GO:0070092 regulation of glucagon secretion	GO:0005788 endoplasmic reticulum lumen;GO:0034774 secretory granule lumen;GO:0060205 cytoplasmic vesicle lumen	GO:0031767 gastric inhibitory polypeptide receptor binding;GO:0031769 glucagon receptor binding;GO:0005179 hormone activity	1	1	0	0	0	0	0	0	0	0	0	0	1	0	0	1	1	0	0	0
C5	727	symbol	H. sapiens	727	H. sapiens	C5	complement C5	GO:0010760 negative regulation of macrophage chemotaxis;GO:1905522 negative regulation of macrophage migration;GO:0006957 complement activation, alternative pathway	GO:0005579 membrane attack complex;GO:0046930 pore complex;GO:0098797 plasma membrane protein complex	GO:0008009 chemokine activity;GO:0042379 chemokine receptor binding;GO:0004866 endopeptidase inhibitor activity	1	1	0	1	0	1	1	0	0	0	0	0	0	1	1	0	0	1	0	1
NFATC2	4773	symbol	H. sapiens	4773	H. sapiens	NFATC2	nuclear factor of activated T cells 2	GO:0033173 calcineurin-NFAT signaling cascade;GO:1905064 negative regulation of vascular associated smooth muscle cell differentiation;GO:0097720 calcineurin-mediated signaling	GO:0035976 transcription factor AP-1 complex;GO:0090575 RNA polymerase II transcription regulator complex;GO:0005667 transcription regulator complex	GO:0019902 phosphatase binding;GO:0001227 DNA-binding transcription repressor activity, RNA polymerase II-specific;GO:0001217 DNA-binding transcription repressor activity	0	0	0	0	1	1	0	1	0	0	0	0	1	0	0	0	0	0	0	0
SLC40A1	30061	symbol	H. sapiens	30061	H. sapiens	SLC40A1	solute carrier family 40 member 1	GO:0060345 spleen trabecula formation;GO:1903988 iron ion export across plasma membrane;GO:0034395 regulation of transcription from RNA polymerase II promoter in response to iron	GO:0008021 synaptic vesicle;GO:0070382 exocytic vesicle;GO:0016323 basolateral plasma membrane	GO:0015093 ferrous iron transmembrane transporter activity;GO:0005381 iron ion transmembrane transporter activity;GO:0046915 transition metal ion transmembrane transporter activity	0	0	0	0	1	1	0	0	0	1	0	0	0	0	0	0	0	0	0	0
GLP2R	9340	symbol	H. sapiens	9340	H. sapiens	GLP2R	glucagon like peptide 2 receptor	GO:0071377 cellular response to glucagon stimulus;GO:0033762 response to glucagon;GO:0007188 adenylate cyclase-modulating G protein-coupled receptor signaling pathway	GO:0016021 integral component of membrane;GO:0031224 intrinsic component of membrane;GO:0005886 plasma membrane	GO:0004967 glucagon receptor activity;GO:0017046 peptide hormone binding;GO:0042562 hormone binding	0	0	0	0	0	0	0	0	0	1	0	0	0	0	0	0	0	0	0	0
BIRC5	332	symbol	H. sapiens	332	H. sapiens	BIRC5	baculoviral IAP repeat containing 5	GO:1903490 positive regulation of mitotic cytokinesis;GO:1902423 regulation of attachment of mitotic spindle microtubules to kinetochore;GO:1902425 positive regulation of attachment of mitotic spindle microtubules to kinetochore	GO:1990713 survivin complex;GO:0032133 chromosome passenger complex;GO:0005876 spindle microtubule	GO:0043027 cysteine-type endopeptidase inhibitor activity involved in apoptotic process;GO:0043028 cysteine-type endopeptidase regulator activity involved in apoptotic process;GO:0004869 cysteine-type endopeptidase inhibitor activity	0	0	0	0	0	0	0	0	1	0	0	0	0	0	1	0	0	0	0	0
DEFB1	1672	symbol	H. sapiens	1672	H. sapiens	DEFB1	defensin beta 1	GO:0060474 positive regulation of flagellated sperm motility involved in capacitation;GO:1902093 positive regulation of flagellated sperm motility;GO:2000155 positive regulation of cilium-dependent cell motility	GO:1990742 microvesicle;GO:0097225 sperm midpiece;GO:0005796 Golgi lumen	GO:0031731 CCR6 chemokine receptor binding;GO:0048020 CCR chemokine receptor binding;GO:0042379 chemokine receptor binding	0	1	0	1	0	0	0	0	0	0	0	0	0	1	0	0	0	0	0	0
PTGER2	5732	symbol	H. sapiens	5732	H. sapiens	PTGER2	prostaglandin E receptor 2	GO:0071380 cellular response to prostaglandin E stimulus;GO:0071379 cellular response to prostaglandin stimulus;GO:0034695 response to prostaglandin E	GO:0005887 integral component of plasma membrane;GO:0031226 intrinsic component of plasma membrane;GO:0016021 integral component of membrane	GO:0004957 prostaglandin E receptor activity;GO:0004955 prostaglandin receptor activity;GO:0004954 prostanoid receptor activity	0	1	0	0	0	0	0	0	0	0	0	0	0	0	0	0	0	0	0	0
HLA-DMB	3109	symbol	H. sapiens	3109	H. sapiens	HLA-DMB	major histocompatibility complex, class II, DM beta	GO:2001190 positive regulation of T cell activation via T cell receptor contact with antigen bound to MHC molecule on antigen presenting cell;GO:2001188 regulation of T cell activation via T cell receptor contact with antigen bound to MHC molecule on antigen presenting cell;GO:0002399 MHC class II protein complex assembly	GO:0042613 MHC class II protein complex;GO:0042611 MHC protein complex;GO:0031902 late endosome membrane	GO:0023026 MHC class II protein complex binding;GO:0023023 MHC protein complex binding;GO:0044877 protein-containing complex binding	0	0	0	0	0	1	0	1	0	0	0	0	0	0	0	0	0	1	0	0
APOBEC3H	164668	symbol	H. sapiens	164668	H. sapiens	APOBEC3H	apolipoprotein B mRNA editing enzyme catalytic subunit 3H	GO:0070383 DNA cytosine deamination;GO:0006216 cytidine catabolic process;GO:0009972 cytidine deamination	GO:0000932 P-body;GO:0036464 cytoplasmic ribonucleoprotein granule;GO:0035770 ribonucleoprotein granule	GO:0047844 deoxycytidine deaminase activity;GO:0004126 cytidine deaminase activity;GO:0019239 deaminase activity	0	0	0	0	0	0	0	0	0	0	0	0	0	0	0	0	0	0	0	0
FYN	2534	symbol	H. sapiens	2534	H. sapiens	FYN	FYN proto-oncogene, Src family tyrosine kinase	GO:0000304 response to singlet oxygen;GO:1905430 cellular response to glycine;GO:0050798 activated T cell proliferation	GO:0097038 perinuclear endoplasmic reticulum;GO:0097386 glial cell projection;GO:0098685 Schaffer collateral - CA1 synapse	GO:0031802 type 5 metabotropic glutamate receptor binding;GO:0035256 G protein-coupled glutamate receptor binding;GO:0016004 phospholipase activator activity	0	1	1	1	1	1	1	1	1	0	0	1	0	0	1	0	1	0	0	0
FGA	2243	symbol	H. sapiens	2243	H. sapiens	FGA	fibrinogen alpha chain	GO:0072377 blood coagulation, common pathway;GO:0043152 induction of bacterial agglutination;GO:0031639 plasminogen activation	GO:0005577 fibrinogen complex;GO:0031093 platelet alpha granule lumen;GO:0031091 platelet alpha granule	GO:0005201 extracellular matrix structural constituent;GO:0050839 cell adhesion molecule binding;GO:0005198 structural molecule activity	0	1	0	1	1	0	1	1	1	0	0	0	0	1	0	1	1	0	0	0
TGFBR3	7049	symbol	H. sapiens	7049	H. sapiens	TGFBR3	transforming growth factor beta receptor 3	GO:0007181 transforming growth factor beta receptor complex assembly;GO:0060318 definitive erythrocyte differentiation;GO:0003150 muscular septum morphogenesis	GO:0034673 inhibin-betaglycan-ActRII complex;GO:0009897 external side of plasma membrane;GO:0043235 receptor complex	GO:0070123 transforming growth factor beta receptor activity, type III;GO:0005114 type II transforming growth factor beta receptor binding;GO:0005024 transforming growth factor beta receptor activity	0	1	0	0	1	0	0	0	0	0	1	1	1	0	0	0	0	1	0	0
IL17RC	84818	symbol	H. sapiens	84818	H. sapiens	IL17RC	interleukin 17 receptor C	GO:0019221 cytokine-mediated signaling pathway;GO:0006954 inflammatory response;GO:0071345 cellular response to cytokine stimulus	GO:0016021 integral component of membrane;GO:0031224 intrinsic component of membrane;GO:0005886 plasma membrane	GO:0030368 interleukin-17 receptor activity;GO:0004896 cytokine receptor activity;GO:0140375 immune receptor activity	0	1	0	0	0	0	0	0	0	0	0	0	0	0	0	0	0	0	0	0
SEMA6B	10501	symbol	H. sapiens	10501	H. sapiens	SEMA6B	semaphorin 6B	GO:0048843 negative regulation of axon extension involved in axon guidance;GO:0048841 regulation of axon extension involved in axon guidance;GO:0071526 semaphorin-plexin signaling pathway	GO:0005887 integral component of plasma membrane;GO:0031226 intrinsic component of plasma membrane;GO:0005615 extracellular space	GO:0030215 semaphorin receptor binding;GO:0045499 chemorepellent activity;GO:0048018 receptor ligand activity	1	1	0	0	0	0	1	0	0	0	0	0	0	0	0	0	0	0	0	0
TNFSF15	9966	symbol	H. sapiens	9966	H. sapiens	TNFSF15	TNF superfamily member 15	GO:0007250 activation of NF-kappaB-inducing kinase activity;GO:0038061 NIK/NF-kappaB signaling;GO:0006919 activation of cysteine-type endopeptidase activity involved in apoptotic process	GO:0005887 integral component of plasma membrane;GO:0031226 intrinsic component of plasma membrane;GO:0005615 extracellular space	GO:0005164 tumor necrosis factor receptor binding;GO:0032813 tumor necrosis factor receptor superfamily binding;GO:0005125 cytokine activity	1	1	0	0	0	0	0	0	1	0	0	0	0	0	1	0	0	0	0	0
APOH	350	symbol	H. sapiens	350	H. sapiens	APOH	apolipoprotein H	GO:0034196 acylglycerol transport;GO:0034197 triglyceride transport;GO:0007597 blood coagulation, intrinsic pathway	GO:0042627 chylomicron;GO:0031089 platelet dense granule lumen;GO:0034361 very-low-density lipoprotein particle	GO:0060230 lipoprotein lipase activator activity;GO:0060229 lipase activator activity;GO:0008201 heparin binding	0	0	1	0	0	0	1	0	0	0	1	0	0	0	0	1	0	0	0	1
INSL4	3641	symbol	H. sapiens	3641	H. sapiens	INSL4	insulin like 4	GO:1901384 positive regulation of chorionic trophoblast cell proliferation;GO:1901382 regulation of chorionic trophoblast cell proliferation;GO:0008284 positive regulation of cell population proliferation	GO:0005615 extracellular space;GO:0005576 extracellular region;GO:0110165 cellular anatomical entity	GO:0005159 insulin-like growth factor receptor binding;GO:0005179 hormone activity;GO:0048018 receptor ligand activity	1	0	0	0	0	0	0	0	0	0	0	0	0	0	0	0	0	0	0	0
MUC5AC	4586	symbol	H. sapiens	4586	H. sapiens	MUC5AC	mucin 5AC, oligomeric mucus/gel-forming	GO:0048015 phosphatidylinositol-mediated signaling;GO:0048017 inositol lipid-mediated signaling;GO:0035556 intracellular signal transduction	GO:0070701 mucus layer;GO:0005796 Golgi lumen;GO:0031012 extracellular matrix	GO:0005201 extracellular matrix structural constituent;GO:0005198 structural molecule activity;GO:0003674 molecular_function	0	0	0	0	0	0	0	0	0	0	0	0	0	0	0	0	0	0	0	0
NTS	4922	symbol	H. sapiens	4922	H. sapiens	NTS	neurotensin	GO:0007218 neuropeptide signaling pathway;GO:0051897 positive regulation of protein kinase B signaling;GO:0051092 positive regulation of NF-kappaB transcription factor activity	GO:0043679 axon terminus;GO:0044306 neuron projection terminus;GO:0150034 distal axon	GO:0005184 neuropeptide hormone activity;GO:0071855 neuropeptide receptor binding;GO:0005179 hormone activity	1	1	0	1	0	1	0	0	1	0	0	0	0	0	0	0	0	0	0	0
ANGPT1	284	symbol	H. sapiens	284	H. sapiens	ANGPT1	angiopoietin 1	GO:2000446 regulation of macrophage migration inhibitory factor signaling pathway;GO:0048014 Tie signaling pathway;GO:1905605 positive regulation of blood-brain barrier permeability	GO:0005902 microvillus;GO:0098858 actin-based cell projection;GO:0045121 membrane raft	GO:0030971 receptor tyrosine kinase binding;GO:1990782 protein tyrosine kinase binding;GO:0019901 protein kinase binding	0	1	0	1	1	1	1	1	1	0	0	1	1	0	0	0	1	0	0	0

## Sheet: Enrichment
GroupID	Category	Term	Description	LogP	Log(q-value)	InTerm_InList	Genes	Symbols
1_Summary	GO Molecular Functions	GO:0048018	receptor ligand activity	-40.6096	-36.3152	40/489	727,1437,1440,1890,1907,2695,2919,2920,2921,3146,3552,3553,3569,3576,3624,3627,3641,4803,4880,4922,5154,5228,6348,6352,6364,6781,7349,7425,8482,8614,9235,9518,9966,10148,10447,10501,10509,57556,79924,723961	C5,CSF2,CSF3,TYMP,EDN2,GIP,CXCL1,CXCL2,CXCL3,HMGB1,IL1A,IL1B,IL6,CXCL8,INHBA,CXCL10,INSL4,NGF,NPPC,NTS,PDGFA,PGF,CCL3,CCL5,CCL20,STC1,UCN,VGF,SEMA7A,STC2,IL32,GDF15,TNFSF15,EBI3,FAM3C,SEMA6B,SEMA4B,SEMA6A,ADM2,INS-IGF2
1_Member	GO Molecular Functions	GO:0048018	receptor ligand activity	-40.6096	-36.3152	40/489	727,1437,1440,1890,1907,2695,2919,2920,2921,3146,3552,3553,3569,3576,3624,3627,3641,4803,4880,4922,5154,5228,6348,6352,6364,6781,7349,7425,8482,8614,9235,9518,9966,10148,10447,10501,10509,57556,79924,723961	C5,CSF2,CSF3,TYMP,EDN2,GIP,CXCL1,CXCL2,CXCL3,HMGB1,IL1A,IL1B,IL6,CXCL8,INHBA,CXCL10,INSL4,NGF,NPPC,NTS,PDGFA,PGF,CCL3,CCL5,CCL20,STC1,UCN,VGF,SEMA7A,STC2,IL32,GDF15,TNFSF15,EBI3,FAM3C,SEMA6B,SEMA4B,SEMA6A,ADM2,INS-IGF2
1_Member	GO Molecular Functions	GO:0030546	signaling receptor activator activity	-40.3605	-36.3152	40/496	727,1437,1440,1890,1907,2695,2919,2920,2921,3146,3552,3553,3569,3576,3624,3627,3641,4803,4880,4922,5154,5228,6348,6352,6364,6781,7349,7425,8482,8614,9235,9518,9966,10148,10447,10501,10509,57556,79924,723961	C5,CSF2,CSF3,TYMP,EDN2,GIP,CXCL1,CXCL2,CXCL3,HMGB1,IL1A,IL1B,IL6,CXCL8,INHBA,CXCL10,INSL4,NGF,NPPC,NTS,PDGFA,PGF,CCL3,CCL5,CCL20,STC1,UCN,VGF,SEMA7A,STC2,IL32,GDF15,TNFSF15,EBI3,FAM3C,SEMA6B,SEMA4B,SEMA6A,ADM2,INS-IGF2
1_Member	GO Molecular Functions	GO:0030545	signaling receptor regulator activity	-38.7478	-34.8786	40/544	727,1437,1440,1890,1907,2695,2919,2920,2921,3146,3552,3553,3569,3576,3624,3627,3641,4803,4880,4922,5154,5228,6348,6352,6364,6781,7349,7425,8482,8614,9235,9518,9966,10148,10447,10501,10509,57556,79924,723961	C5,CSF2,CSF3,TYMP,EDN2,GIP,CXCL1,CXCL2,CXCL3,HMGB1,IL1A,IL1B,IL6,CXCL8,INHBA,CXCL10,INSL4,NGF,NPPC,NTS,PDGFA,PGF,CCL3,CCL5,CCL20,STC1,UCN,VGF,SEMA7A,STC2,IL32,GDF15,TNFSF15,EBI3,FAM3C,SEMA6B,SEMA4B,SEMA6A,ADM2,INS-IGF2
1_Member	GO Molecular Functions	GO:0005179	hormone activity	-13.0564	-10.4584	12/122	1907,2695,3624,3641,4880,4922,6781,7349,7425,8614,79924,723961	EDN2,GIP,INHBA,INSL4,NPPC,NTS,STC1,UCN,VGF,STC2,ADM2,INS-IGF2
2_Summary	GO Biological Processes	GO:0006954	inflammatory response	-32.2314	-28.4872	35/523	718,727,2919,2920,2921,3146,3552,3553,3556,3569,3576,3627,3689,3725,4035,4973,5004,5724,5732,5743,5806,5971,6280,6289,6348,6352,6364,7057,7097,7098,7349,8482,64332,84818,133396,1437,1440,1672,2243,2263,2634,3105,3106,3934,4792,5266,6590,7425,9636,10062,64127,79132,284,1890,1907,2534,4804,5154,5228,5328,5880,10451,10501,10509,57556,3624,9235,9518,9966,10148,10447,3383,5371,6095,7791,9641,163702,19…	C3,C5,CXCL1,CXCL2,CXCL3,HMGB1,IL1A,IL1B,IL1RAP,IL6,CXCL8,CXCL10,ITGB2,JUN,LRP1,OLR1,ORM1,PTAFR,PTGER2,PTGS2,PTX3,RELB,S100A9,SAA2,CCL3,CCL5,CCL20,THBS1,TLR2,TLR3,UCN,SEMA7A,NFKBIZ,IL17RC,IL31RA,CSF2,CSF3,DEFB1,FGA,FGFR2,GBP2,HLA-A,HLA-B,LCN2,NFKBIA,PI3,SLPI,VGF,ISG15,NR1H3,NOD2,DHX58,ANGPT1,TYMP,EDN2,FYN,NGFR,PDGFA,PGF,PLAU,RAC2,VAV3,SEMA6B,SEMA4B,SEMA6A,INHBA,IL32,GDF15,TNFSF15,EBI3,FAM3C,ICAM1,…
2_Member	GO Biological Processes	GO:0006954	inflammatory response	-32.2314	-28.4872	35/523	718,727,2919,2920,2921,3146,3552,3553,3556,3569,3576,3627,3689,3725,4035,4973,5004,5724,5732,5743,5806,5971,6280,6289,6348,6352,6364,7057,7097,7098,7349,8482,64332,84818,133396	C3,C5,CXCL1,CXCL2,CXCL3,HMGB1,IL1A,IL1B,IL1RAP,IL6,CXCL8,CXCL10,ITGB2,JUN,LRP1,OLR1,ORM1,PTAFR,PTGER2,PTGS2,PTX3,RELB,S100A9,SAA2,CCL3,CCL5,CCL20,THBS1,TLR2,TLR3,UCN,SEMA7A,NFKBIZ,IL17RC,IL31RA
2_Member	GO Biological Processes	GO:0009617	response to bacterium	-28.4787	-24.8314	36/732	718,1437,1440,1672,2243,2263,2634,2919,2920,2921,3105,3106,3146,3552,3553,3569,3576,3627,3934,4792,5266,5724,5732,5743,6280,6348,6352,6364,6590,7097,7098,7425,9636,10062,64127,79132	C3,CSF2,CSF3,DEFB1,FGA,FGFR2,GBP2,CXCL1,CXCL2,CXCL3,HLA-A,HLA-B,HMGB1,IL1A,IL1B,IL6,CXCL8,CXCL10,LCN2,NFKBIA,PI3,PTAFR,PTGER2,PTGS2,S100A9,CCL3,CCL5,CCL20,SLPI,TLR2,TLR3,VGF,ISG15,NR1H3,NOD2,DHX58
2_Member	GO Biological Processes	GO:0006935	chemotaxis	-25.9044	-22.3529	30/506	284,727,1672,1890,1907,2534,2919,2920,2921,3146,3553,3569,3576,3627,3689,4804,5154,5228,5328,5724,5880,6280,6348,6352,6364,8482,10451,10501,10509,57556	ANGPT1,C5,DEFB1,TYMP,EDN2,FYN,CXCL1,CXCL2,CXCL3,HMGB1,IL1B,IL6,CXCL8,CXCL10,ITGB2,NGFR,PDGFA,PGF,PLAU,PTAFR,RAC2,S100A9,CCL3,CCL5,CCL20,SEMA7A,VAV3,SEMA6B,SEMA4B,SEMA6A
2_Member	GO Biological Processes	GO:0042330	taxis	-25.854	-22.3529	30/508	284,727,1672,1890,1907,2534,2919,2920,2921,3146,3553,3569,3576,3627,3689,4804,5154,5228,5328,5724,5880,6280,6348,6352,6364,8482,10451,10501,10509,57556	ANGPT1,C5,DEFB1,TYMP,EDN2,FYN,CXCL1,CXCL2,CXCL3,HMGB1,IL1B,IL6,CXCL8,CXCL10,ITGB2,NGFR,PDGFA,PGF,PLAU,PTAFR,RAC2,S100A9,CCL3,CCL5,CCL20,SEMA7A,VAV3,SEMA6B,SEMA4B,SEMA6A
2_Member	GO Molecular Functions	GO:0005125	cytokine activity	-21.7494	-18.3674	21/235	727,1437,1440,2919,2920,2921,3146,3552,3553,3569,3576,3624,3627,6348,6352,6364,9235,9518,9966,10148,10447	C5,CSF2,CSF3,CXCL1,CXCL2,CXCL3,HMGB1,IL1A,IL1B,IL6,CXCL8,INHBA,CXCL10,CCL3,CCL5,CCL20,IL32,GDF15,TNFSF15,EBI3,FAM3C
2_Member	GO Biological Processes	GO:0032496	response to lipopolysaccharide	-21.7136	-18.3674	23/318	1437,1440,2263,2919,2920,2921,3146,3552,3553,3569,3576,3627,4792,5724,5732,5743,6280,6348,6352,6590,7097,10062,64127	CSF2,CSF3,FGFR2,CXCL1,CXCL2,CXCL3,HMGB1,IL1A,IL1B,IL6,CXCL8,CXCL10,NFKBIA,PTAFR,PTGER2,PTGS2,S100A9,CCL3,CCL5,SLPI,TLR2,NR1H3,NOD2
2_Member	GO Biological Processes	GO:0002237	response to molecule of bacterial origin	-21.0811	-17.814	23/339	1437,1440,2263,2919,2920,2921,3146,3552,3553,3569,3576,3627,4792,5724,5732,5743,6280,6348,6352,6590,7097,10062,64127	CSF2,CSF3,FGFR2,CXCL1,CXCL2,CXCL3,HMGB1,IL1A,IL1B,IL6,CXCL8,CXCL10,NFKBIA,PTAFR,PTGER2,PTGS2,S100A9,CCL3,CCL5,SLPI,TLR2,NR1H3,NOD2
2_Member	GO Biological Processes	GO:0071345	cellular response to cytokine stimulus	-20.4936	-17.2691	29/710	1437,1440,1907,2634,2919,2920,2921,3383,3552,3553,3556,3569,3576,3627,4792,5371,6095,6348,6352,6364,7057,7097,7098,7791,9641,10148,84818,133396,163702	CSF2,CSF3,EDN2,GBP2,CXCL1,CXCL2,CXCL3,ICAM1,IL1A,IL1B,IL1RAP,IL6,CXCL8,CXCL10,NFKBIA,PML,RORA,CCL3,CCL5,CCL20,THBS1,TLR2,TLR3,ZYX,IKBKE,EBI3,IL17RC,IL31RA,IFNLR1
2_Member	GO Biological Processes	GO:2000147	positive regulation of cell motility	-20.425	-17.2691	27/584	284,1672,1907,1956,3146,3383,3552,3553,3569,3576,3627,3725,5154,5228,5328,5724,5743,5880,6348,6352,6364,7057,7448,8482,10501,10509,57556	ANGPT1,DEFB1,EDN2,EGFR,HMGB1,ICAM1,IL1A,IL1B,IL6,CXCL8,CXCL10,JUN,PDGFA,PGF,PLAU,PTAFR,PTGS2,RAC2,CCL3,CCL5,CCL20,THBS1,VTN,SEMA7A,SEMA6B,SEMA4B,SEMA6A
2_Member	GO Molecular Functions	GO:0005126	cytokine receptor binding	-20.4112	-17.2691	21/272	727,1437,1440,1672,2919,2920,2921,3552,3553,3556,3569,3576,3627,4803,5228,6348,6352,6364,7049,9966,10148	C5,CSF2,CSF3,DEFB1,CXCL1,CXCL2,CXCL3,IL1A,IL1B,IL1RAP,IL6,CXCL8,CXCL10,NGF,PGF,CCL3,CCL5,CCL20,TGFBR3,TNFSF15,EBI3
2_Member	GO Biological Processes	GO:0051272	positive regulation of cellular component movement	-20.1783	-17.0778	27/597	284,1672,1907,1956,3146,3383,3552,3553,3569,3576,3627,3725,5154,5228,5328,5724,5743,5880,6348,6352,6364,7057,7448,8482,10501,10509,57556	ANGPT1,DEFB1,EDN2,EGFR,HMGB1,ICAM1,IL1A,IL1B,IL6,CXCL8,CXCL10,JUN,PDGFA,PGF,PLAU,PTAFR,PTGS2,RAC2,CCL3,CCL5,CCL20,THBS1,VTN,SEMA7A,SEMA6B,SEMA4B,SEMA6A
2_Member	GO Biological Processes	GO:0040017	positive regulation of locomotion	-20.1408	-17.0733	27/599	284,1672,1907,1956,3146,3383,3552,3553,3569,3576,3627,3725,5154,5228,5328,5724,5743,5880,6348,6352,6364,7057,7448,8482,10501,10509,57556	ANGPT1,DEFB1,EDN2,EGFR,HMGB1,ICAM1,IL1A,IL1B,IL6,CXCL8,CXCL10,JUN,PDGFA,PGF,PLAU,PTAFR,PTGS2,RAC2,CCL3,CCL5,CCL20,THBS1,VTN,SEMA7A,SEMA6B,SEMA4B,SEMA6A
2_Member	GO Biological Processes	GO:0030335	positive regulation of cell migration	-19.6988	-16.6536	26/560	284,1907,1956,3146,3383,3552,3553,3569,3576,3627,3725,5154,5228,5328,5724,5743,5880,6348,6352,6364,7057,7448,8482,10501,10509,57556	ANGPT1,EDN2,EGFR,HMGB1,ICAM1,IL1A,IL1B,IL6,CXCL8,CXCL10,JUN,PDGFA,PGF,PLAU,PTAFR,PTGS2,RAC2,CCL3,CCL5,CCL20,THBS1,VTN,SEMA7A,SEMA6B,SEMA4B,SEMA6A
2_Member	GO Biological Processes	GO:0071396	cellular response to lipid	-19.6383	-16.6143	25/503	1437,1440,1956,2263,2919,2920,2921,3146,3552,3553,3569,3576,3624,3627,4792,5724,6095,6348,6352,6752,6781,7097,7421,10062,64127	CSF2,CSF3,EGFR,FGFR2,CXCL1,CXCL2,CXCL3,HMGB1,IL1A,IL1B,IL6,CXCL8,INHBA,CXCL10,NFKBIA,PTAFR,RORA,CCL3,CCL5,SSTR2,STC1,TLR2,VDR,NR1H3,NOD2
2_Member	GO Biological Processes	GO:0071222	cellular response to lipopolysaccharide	-18.7117	-15.7456	18/200	1437,1440,2919,2920,2921,3146,3552,3553,3569,3576,3627,4792,5724,6348,6352,7097,10062,64127	CSF2,CSF3,CXCL1,CXCL2,CXCL3,HMGB1,IL1A,IL1B,IL6,CXCL8,CXCL10,NFKBIA,PTAFR,CCL3,CCL5,TLR2,NR1H3,NOD2
2_Member	GO Biological Processes	GO:0071219	cellular response to molecule of bacterial origin	-18.2532	-15.3219	18/212	1437,1440,2919,2920,2921,3146,3552,3553,3569,3576,3627,4792,5724,6348,6352,7097,10062,64127	CSF2,CSF3,CXCL1,CXCL2,CXCL3,HMGB1,IL1A,IL1B,IL6,CXCL8,CXCL10,NFKBIA,PTAFR,CCL3,CCL5,TLR2,NR1H3,NOD2
2_Member	GO Biological Processes	GO:0019221	cytokine-mediated signaling pathway	-17.891	-14.9919	21/360	1437,1440,1907,2919,2920,2921,3552,3553,3556,3569,3576,3627,4792,6348,6352,6364,9641,10148,84818,133396,163702	CSF2,CSF3,EDN2,CXCL1,CXCL2,CXCL3,IL1A,IL1B,IL1RAP,IL6,CXCL8,CXCL10,NFKBIA,CCL3,CCL5,CCL20,IKBKE,EBI3,IL17RC,IL31RA,IFNLR1
2_Member	GO Biological Processes	GO:0071216	cellular response to biotic stimulus	-17.3168	-14.4477	18/239	1437,1440,2919,2920,2921,3146,3552,3553,3569,3576,3627,4792,5724,6348,6352,7097,10062,64127	CSF2,CSF3,CXCL1,CXCL2,CXCL3,HMGB1,IL1A,IL1B,IL6,CXCL8,CXCL10,NFKBIA,PTAFR,CCL3,CCL5,TLR2,NR1H3,NOD2
2_Member	GO Biological Processes	GO:0030593	neutrophil chemotaxis	-17.1265	-14.2716	13/79	1907,2919,2920,2921,3553,3576,3627,3689,6280,6348,6352,6364,10451	EDN2,CXCL1,CXCL2,CXCL3,IL1B,CXCL8,CXCL10,ITGB2,S100A9,CCL3,CCL5,CCL20,VAV3
2_Member	GO Biological Processes	GO:0071621	granulocyte chemotaxis	-16.7587	-13.9176	13/84	1907,2919,2920,2921,3553,3576,3627,3689,6280,6348,6352,6364,10451	EDN2,CXCL1,CXCL2,CXCL3,IL1B,CXCL8,CXCL10,ITGB2,S100A9,CCL3,CCL5,CCL20,VAV3
2_Member	GO Biological Processes	GO:0030595	leukocyte chemotaxis	-16.5572	-13.7294	15/145	1907,2919,2920,2921,3146,3553,3569,3576,3627,3689,6280,6348,6352,6364,10451	EDN2,CXCL1,CXCL2,CXCL3,HMGB1,IL1B,IL6,CXCL8,CXCL10,ITGB2,S100A9,CCL3,CCL5,CCL20,VAV3
2_Member	GO Biological Processes	GO:1990266	neutrophil migration	-16.4144	-13.5996	13/89	1907,2919,2920,2921,3553,3576,3627,3689,6280,6348,6352,6364,10451	EDN2,CXCL1,CXCL2,CXCL3,IL1B,CXCL8,CXCL10,ITGB2,S100A9,CCL3,CCL5,CCL20,VAV3
2_Member	GO Biological Processes	GO:0050900	leukocyte migration	-16.2294	-13.4394	17/230	1907,2534,2919,2920,2921,3146,3383,3553,3569,3576,3627,3689,6280,6348,6352,6364,10451	EDN2,FYN,CXCL1,CXCL2,CXCL3,HMGB1,ICAM1,IL1B,IL6,CXCL8,CXCL10,ITGB2,S100A9,CCL3,CCL5,CCL20,VAV3
2_Member	GO Biological Processes	GO:0097529	myeloid leukocyte migration	-15.9707	-13.2042	14/125	1907,2919,2920,2921,3553,3569,3576,3627,3689,6280,6348,6352,6364,10451	EDN2,CXCL1,CXCL2,CXCL3,IL1B,IL6,CXCL8,CXCL10,ITGB2,S100A9,CCL3,CCL5,CCL20,VAV3
2_Member	GO Biological Processes	GO:0097530	granulocyte migration	-15.9055	-13.1503	13/97	1907,2919,2920,2921,3553,3576,3627,3689,6280,6348,6352,6364,10451	EDN2,CXCL1,CXCL2,CXCL3,IL1B,CXCL8,CXCL10,ITGB2,S100A9,CCL3,CCL5,CCL20,VAV3
2_Member	GO Biological Processes	GO:0060326	cell chemotaxis	-15.5997	-12.8662	16/207	727,1907,2919,2920,2921,3146,3553,3569,3576,3627,3689,6280,6348,6352,6364,10451	C5,EDN2,CXCL1,CXCL2,CXCL3,HMGB1,IL1B,IL6,CXCL8,CXCL10,ITGB2,S100A9,CCL3,CCL5,CCL20,VAV3
2_Member	GO Biological Processes	GO:0002687	positive regulation of leukocyte migration	-15.2229	-12.4999	14/141	1907,3146,3383,3552,3569,3576,3627,5228,5724,5880,6348,6352,6364,7057	EDN2,HMGB1,ICAM1,IL1A,IL6,CXCL8,CXCL10,PGF,PTAFR,RAC2,CCL3,CCL5,CCL20,THBS1
2_Member	GO Biological Processes	GO:0002685	regulation of leukocyte migration	-15.2107	-12.498	16/219	727,1907,3146,3383,3552,3569,3576,3627,5228,5724,5880,6348,6352,6364,7057,64127	C5,EDN2,HMGB1,ICAM1,IL1A,IL6,CXCL8,CXCL10,PGF,PTAFR,RAC2,CCL3,CCL5,CCL20,THBS1,NOD2
2_Member	GO Biological Processes	GO:0050920	regulation of chemotaxis	-14.9944	-12.3014	16/226	727,1907,3146,3569,3576,3627,5228,5880,6348,6352,7057,8482,10501,10509,57556,64127	C5,EDN2,HMGB1,IL6,CXCL8,CXCL10,PGF,RAC2,CCL3,CCL5,THBS1,SEMA7A,SEMA6B,SEMA4B,SEMA6A,NOD2
2_Member	GO Molecular Functions	GO:0001664	G protein-coupled receptor binding	-14.5975	-11.9234	17/288	153,718,727,1672,1907,2534,2695,2919,2920,2921,3576,3627,4922,6348,6352,6364,7349	ADRB1,C3,C5,DEFB1,EDN2,FYN,GIP,CXCL1,CXCL2,CXCL3,CXCL8,CXCL10,NTS,CCL3,CCL5,CCL20,UCN
2_Member	GO Biological Processes	GO:0002688	regulation of leukocyte chemotaxis	-12.9706	-10.3802	12/124	727,1907,3146,3569,3576,3627,5228,5880,6348,6352,7057,64127	C5,EDN2,HMGB1,IL6,CXCL8,CXCL10,PGF,RAC2,CCL3,CCL5,THBS1,NOD2
2_Member	GO Molecular Functions	GO:0042379	chemokine receptor binding	-12.5615	-10.0076	10/71	727,1672,2919,2920,2921,3576,3627,6348,6352,6364	C5,DEFB1,CXCL1,CXCL2,CXCL3,CXCL8,CXCL10,CCL3,CCL5,CCL20
2_Member	GO Molecular Functions	GO:0008009	chemokine activity	-12.452	-9.91862	9/49	727,2919,2920,2921,3576,3627,6348,6352,6364	C5,CXCL1,CXCL2,CXCL3,CXCL8,CXCL10,CCL3,CCL5,CCL20
2_Member	GO Biological Processes	GO:0002690	positive regulation of leukocyte chemotaxis	-11.3031	-8.91111	10/94	1907,3146,3569,3576,3627,5228,5880,6348,6352,7057	EDN2,HMGB1,IL6,CXCL8,CXCL10,PGF,RAC2,CCL3,CCL5,THBS1
2_Member	GO Biological Processes	GO:0050921	positive regulation of chemotaxis	-9.5676	-7.36747	10/140	1907,3146,3569,3576,3627,5228,5880,6348,6352,7057	EDN2,HMGB1,IL6,CXCL8,CXCL10,PGF,RAC2,CCL3,CCL5,THBS1
2_Member	GO Biological Processes	GO:0070098	chemokine-mediated signaling pathway	-8.83488	-6.70081	8/82	2919,2920,2921,3576,3627,6348,6352,6364	CXCL1,CXCL2,CXCL3,CXCL8,CXCL10,CCL3,CCL5,CCL20
2_Member	GO Biological Processes	GO:1990868	response to chemokine	-8.50901	-6.4008	8/90	2919,2920,2921,3576,3627,6348,6352,6364	CXCL1,CXCL2,CXCL3,CXCL8,CXCL10,CCL3,CCL5,CCL20
2_Member	GO Biological Processes	GO:1990869	cellular response to chemokine	-8.50901	-6.4008	8/90	2919,2920,2921,3576,3627,6348,6352,6364	CXCL1,CXCL2,CXCL3,CXCL8,CXCL10,CCL3,CCL5,CCL20
2_Member	GO Molecular Functions	GO:0045236	CXCR chemokine receptor binding	-8.10738	-6.06216	5/18	2919,2920,2921,3576,3627	CXCL1,CXCL2,CXCL3,CXCL8,CXCL10
2_Member	GO Biological Processes	GO:0061844	antimicrobial humoral immune response mediated by antimicrobial peptide	-7.82491	-5.81311	7/71	1672,2919,2920,2921,3576,3627,6280	DEFB1,CXCL1,CXCL2,CXCL3,CXCL8,CXCL10,S100A9
3_Summary	GO Biological Processes	GO:0032103	positive regulation of response to external stimulus	-21.9633	-18.5201	26/455	350,718,1907,2534,3134,3146,3553,3569,3576,3627,4792,5228,5328,5743,5880,6280,6348,6352,7057,7097,7098,7448,9641,64127,64332,79132,384,3105,3106,4277,6095,7349,7791,8482,9636,10062,163702,3725	APOH,C3,EDN2,FYN,HLA-F,HMGB1,IL1B,IL6,CXCL8,CXCL10,NFKBIA,PGF,PLAU,PTGS2,RAC2,S100A9,CCL3,CCL5,THBS1,TLR2,TLR3,VTN,IKBKE,NOD2,NFKBIZ,DHX58,ARG2,HLA-A,HLA-B,MICB,RORA,UCN,ZYX,SEMA7A,ISG15,NR1H3,IFNLR1,JUN
3_Member	GO Biological Processes	GO:0032103	positive regulation of response to external stimulus	-21.9633	-18.5201	26/455	350,718,1907,2534,3134,3146,3553,3569,3576,3627,4792,5228,5328,5743,5880,6280,6348,6352,7057,7097,7098,7448,9641,64127,64332,79132	APOH,C3,EDN2,FYN,HLA-F,HMGB1,IL1B,IL6,CXCL8,CXCL10,NFKBIA,PGF,PLAU,PTGS2,RAC2,S100A9,CCL3,CCL5,THBS1,TLR2,TLR3,VTN,IKBKE,NOD2,NFKBIZ,DHX58
3_Member	GO Biological Processes	GO:0031347	regulation of defense response	-20.1688	-17.0778	28/662	384,718,2534,3105,3106,3134,3146,3553,3569,4277,4792,5743,6095,6280,6348,6352,7097,7098,7349,7791,8482,9636,9641,10062,64127,64332,79132,163702	ARG2,C3,FYN,HLA-A,HLA-B,HLA-F,HMGB1,IL1B,IL6,MICB,NFKBIA,PTGS2,RORA,S100A9,CCL3,CCL5,TLR2,TLR3,UCN,ZYX,SEMA7A,ISG15,IKBKE,NR1H3,NOD2,NFKBIZ,DHX58,IFNLR1
3_Member	GO Biological Processes	GO:0031349	positive regulation of defense response	-14.2099	-11.5626	17/304	718,2534,3134,3146,3553,3569,4792,5743,6280,6348,6352,7097,7098,7349,9641,64127,64332	C3,FYN,HLA-F,HMGB1,IL1B,IL6,NFKBIA,PTGS2,S100A9,CCL3,CCL5,TLR2,TLR3,UCN,IKBKE,NOD2,NFKBIZ
3_Member	GO Biological Processes	GO:0050727	regulation of inflammatory response	-12.2724	-9.76922	17/400	718,2534,3553,3569,4792,5743,6095,6280,6348,6352,7097,7098,7791,8482,10062,64127,64332	C3,FYN,IL1B,IL6,NFKBIA,PTGS2,RORA,S100A9,CCL3,CCL5,TLR2,TLR3,ZYX,SEMA7A,NR1H3,NOD2,NFKBIZ
3_Member	GO Biological Processes	GO:0050729	positive regulation of inflammatory response	-9.21637	-7.05196	10/152	718,3553,3569,4792,5743,6280,6348,7097,7098,64332	C3,IL1B,IL6,NFKBIA,PTGS2,S100A9,CCL3,TLR2,TLR3,NFKBIZ
3_Member	GO Biological Processes	GO:0009612	response to mechanical stimulus	-6.85863	-4.95013	9/203	2534,3553,3627,3725,4792,5743,7057,7098,7349	FYN,IL1B,CXCL10,JUN,NFKBIA,PTGS2,THBS1,TLR3,UCN
4_Summary	GO Biological Processes	GO:0001819	positive regulation of cytokine production	-21.3531	-18.0483	26/481	718,727,1437,3105,3134,3146,3552,3553,3556,3569,5004,5724,5743,6095,6348,7057,7097,7098,7349,8482,9636,10148,64127,64135,79132,91543,3106,284,384,1672,2243,2634,3934,5266,6280,6364,6590,7425,10062,1440,4922,9641,2534,3065,4792,1907,1956,7421,5371,154,4035	C3,C5,CSF2,HLA-A,HLA-F,HMGB1,IL1A,IL1B,IL1RAP,IL6,ORM1,PTAFR,PTGS2,RORA,CCL3,THBS1,TLR2,TLR3,UCN,SEMA7A,ISG15,EBI3,NOD2,IFIH1,DHX58,RSAD2,HLA-B,ANGPT1,ARG2,DEFB1,FGA,GBP2,LCN2,PI3,S100A9,CCL20,SLPI,VGF,NR1H3,CSF3,NTS,IKBKE,FYN,HDAC1,NFKBIA,EDN2,EGFR,VDR,PML,ADRB2,LRP1
4_Member	GO Biological Processes	GO:0001819	positive regulation of cytokine production	-21.3531	-18.0483	26/481	718,727,1437,3105,3134,3146,3552,3553,3556,3569,5004,5724,5743,6095,6348,7057,7097,7098,7349,8482,9636,10148,64127,64135,79132,91543	C3,C5,CSF2,HLA-A,HLA-F,HMGB1,IL1A,IL1B,IL1RAP,IL6,ORM1,PTAFR,PTGS2,RORA,CCL3,THBS1,TLR2,TLR3,UCN,SEMA7A,ISG15,EBI3,NOD2,IFIH1,DHX58,RSAD2
4_Member	GO Biological Processes	GO:0032755	positive regulation of interleukin-6 production	-12.699	-10.1309	11/97	3146,3552,3553,3556,3569,5724,7097,7098,7349,64127,64135	HMGB1,IL1A,IL1B,IL1RAP,IL6,PTAFR,TLR2,TLR3,UCN,NOD2,IFIH1
4_Member	GO Biological Processes	GO:0032675	regulation of interleukin-6 production	-12.5521	-10.0052	13/174	3106,3146,3552,3553,3556,3569,5004,5724,7097,7098,7349,64127,64135	HLA-B,HMGB1,IL1A,IL1B,IL1RAP,IL6,ORM1,PTAFR,TLR2,TLR3,UCN,NOD2,IFIH1
4_Member	GO Biological Processes	GO:0032760	positive regulation of tumor necrosis factor production	-12.3585	-9.84177	11/104	3146,3552,3569,5004,5724,6348,7057,7097,7098,64127,64135	HMGB1,IL1A,IL6,ORM1,PTAFR,CCL3,THBS1,TLR2,TLR3,NOD2,IFIH1
4_Member	GO Biological Processes	GO:0032680	regulation of tumor necrosis factor production	-12.2704	-9.76922	13/183	284,384,3146,3552,3569,5004,5724,6348,7057,7097,7098,64127,64135	ANGPT1,ARG2,HMGB1,IL1A,IL6,ORM1,PTAFR,CCL3,THBS1,TLR2,TLR3,NOD2,IFIH1
4_Member	GO Biological Processes	GO:1903557	positive regulation of tumor necrosis factor superfamily cytokine production	-12.1749	-9.67991	11/108	3146,3552,3569,5004,5724,6348,7057,7097,7098,64127,64135	HMGB1,IL1A,IL6,ORM1,PTAFR,CCL3,THBS1,TLR2,TLR3,NOD2,IFIH1
4_Member	GO Biological Processes	GO:1903555	regulation of tumor necrosis factor superfamily cytokine production	-12.1203	-9.63136	13/188	284,384,3146,3552,3569,5004,5724,6348,7057,7097,7098,64127,64135	ANGPT1,ARG2,HMGB1,IL1A,IL6,ORM1,PTAFR,CCL3,THBS1,TLR2,TLR3,NOD2,IFIH1
4_Member	GO Biological Processes	GO:0042742	defense response to bacterium	-12.0288	-9.55765	16/351	1672,2243,2634,3105,3553,3569,3934,5266,6280,6364,6590,7097,7098,7425,9636,64127	DEFB1,FGA,GBP2,HLA-A,IL1B,IL6,LCN2,PI3,S100A9,CCL20,SLPI,TLR2,TLR3,VGF,ISG15,NOD2
4_Member	GO Biological Processes	GO:0032642	regulation of chemokine production	-8.24859	-6.1879	8/97	384,727,3146,3553,3569,7097,7098,64127	ARG2,C5,HMGB1,IL1B,IL6,TLR2,TLR3,NOD2
4_Member	GO Biological Processes	GO:0032722	positive regulation of chemokine production	-7.86855	-5.85271	7/70	727,3146,3553,3569,7097,7098,64127	C5,HMGB1,IL1B,IL6,TLR2,TLR3,NOD2
4_Member	GO Biological Processes	GO:0062208	positive regulation of pattern recognition receptor signaling pathway	-7.6428	-5.65257	6/44	3146,7097,7098,10062,79132,91543	HMGB1,TLR2,TLR3,NR1H3,DHX58,RSAD2
4_Member	GO Biological Processes	GO:0034123	positive regulation of toll-like receptor signaling pathway	-7.06171	-5.12199	5/28	3146,7097,7098,10062,91543	HMGB1,TLR2,TLR3,NR1H3,RSAD2
4_Member	GO Biological Processes	GO:0051091	positive regulation of DNA-binding transcription factor activity	-6.91	-4.99671	10/265	1440,3553,3556,3569,4922,6280,7097,7098,9641,64127	CSF3,IL1B,IL1RAP,IL6,NTS,S100A9,TLR2,TLR3,IKBKE,NOD2
4_Member	GO Biological Processes	GO:0032757	positive regulation of interleukin-8 production	-6.72836	-4.83389	6/62	3146,3553,3569,7097,7098,64127	HMGB1,IL1B,IL6,TLR2,TLR3,NOD2
4_Member	GO Biological Processes	GO:0032655	regulation of interleukin-12 production	-6.68631	-4.79794	6/63	3106,3146,7057,7097,7098,64127	HLA-B,HMGB1,THBS1,TLR2,TLR3,NOD2
4_Member	GO Biological Processes	GO:0062207	regulation of pattern recognition receptor signaling pathway	-6.61207	-4.7312	7/106	3146,7097,7098,10062,64127,79132,91543	HMGB1,TLR2,TLR3,NR1H3,NOD2,DHX58,RSAD2
4_Member	GO Biological Processes	GO:0050830	defense response to Gram-positive bacterium	-6.55645	-4.68441	7/108	1672,2634,3105,3553,3569,7097,64127	DEFB1,GBP2,HLA-A,IL1B,IL6,TLR2,NOD2
4_Member	GO Biological Processes	GO:0032733	positive regulation of interleukin-10 production	-6.19753	-4.38223	5/41	3146,3569,7097,9636,64127	HMGB1,IL6,TLR2,ISG15,NOD2
4_Member	GO Biological Processes	GO:0034121	regulation of toll-like receptor signaling pathway	-6.1972	-4.38223	6/76	3146,7097,7098,10062,64127,91543	HMGB1,TLR2,TLR3,NR1H3,NOD2,RSAD2
4_Member	GO Biological Processes	GO:0043122	regulation of I-kappaB kinase/NF-kappaB signaling	-6.02655	-4.2378	9/255	284,2534,3065,3552,3553,6095,7098,9641,64127	ANGPT1,FYN,HDAC1,IL1A,IL1B,RORA,TLR3,IKBKE,NOD2
4_Member	GO Biological Processes	GO:0051090	regulation of DNA-binding transcription factor activity	-5.66115	-3.91586	11/452	1440,3553,3556,3569,4792,4922,6280,7097,7098,9641,64127	CSF3,IL1B,IL1RAP,IL6,NFKBIA,NTS,S100A9,TLR2,TLR3,IKBKE,NOD2
4_Member	GO Biological Processes	GO:0051092	positive regulation of NF-kappaB transcription factor activity	-5.51756	-3.79248	7/154	3553,3556,4922,6280,7097,7098,64127	IL1B,IL1RAP,NTS,S100A9,TLR2,TLR3,NOD2
4_Member	GO Biological Processes	GO:0032677	regulation of interleukin-8 production	-5.44447	-3.72694	6/102	3146,3553,3569,7097,7098,64127	HMGB1,IL1B,IL6,TLR2,TLR3,NOD2
4_Member	GO Biological Processes	GO:0051341	regulation of oxidoreductase activity	-5.30033	-3.60244	6/108	1907,1956,3552,3553,7421,64127	EDN2,EGFR,IL1A,IL1B,VDR,NOD2
4_Member	GO Biological Processes	GO:0032653	regulation of interleukin-10 production	-5.25591	-3.56671	5/63	3146,3569,7097,9636,64127	HMGB1,IL6,TLR2,ISG15,NOD2
4_Member	GO Biological Processes	GO:1901222	regulation of NIK/NF-kappaB signaling	-5.25421	-3.56597	6/110	1956,3553,4792,7097,7098,64127	EGFR,IL1B,NFKBIA,TLR2,TLR3,NOD2
4_Member	GO Biological Processes	GO:1901224	positive regulation of NIK/NF-kappaB signaling	-5.12347	-3.45208	5/67	1956,3553,7097,7098,64127	EGFR,IL1B,TLR2,TLR3,NOD2
4_Member	GO Biological Processes	GO:0046328	regulation of JNK cascade	-4.6203	-3.01834	6/142	1956,3146,3552,3553,7098,64127	EGFR,HMGB1,IL1A,IL1B,TLR3,NOD2
4_Member	GO Biological Processes	GO:0032735	positive regulation of interleukin-12 production	-4.61262	-3.01222	4/42	3146,7097,7098,64127	HMGB1,TLR2,TLR3,NOD2
4_Member	GO Biological Processes	GO:0046330	positive regulation of JNK cascade	-4.36231	-2.79493	5/96	3146,3552,3553,7098,64127	HMGB1,IL1A,IL1B,TLR3,NOD2
4_Member	GO Biological Processes	GO:0051353	positive regulation of oxidoreductase activity	-3.99763	-2.4742	4/60	1907,3553,7421,64127	EDN2,IL1B,VDR,NOD2
4_Member	GO Biological Processes	GO:0043123	positive regulation of I-kappaB kinase/NF-kappaB signaling	-3.92988	-2.41293	6/189	2534,3552,3553,7098,9641,64127	FYN,IL1A,IL1B,TLR3,IKBKE,NOD2
4_Member	GO Biological Processes	GO:0032872	regulation of stress-activated MAPK cascade	-3.81974	-2.31982	6/198	1956,3146,3552,3553,7098,64127	EGFR,HMGB1,IL1A,IL1B,TLR3,NOD2
4_Member	GO Biological Processes	GO:0070302	regulation of stress-activated protein kinase signaling cascade	-3.78427	-2.28989	6/201	1956,3146,3552,3553,7098,64127	EGFR,HMGB1,IL1A,IL1B,TLR3,NOD2
4_Member	GO Biological Processes	GO:0032874	positive regulation of stress-activated MAPK cascade	-3.70789	-2.22197	5/132	3146,3552,3553,7098,64127	HMGB1,IL1A,IL1B,TLR3,NOD2
4_Member	GO Biological Processes	GO:0070304	positive regulation of stress-activated protein kinase signaling cascade	-3.67749	-2.19634	5/134	3146,3552,3553,7098,64127	HMGB1,IL1A,IL1B,TLR3,NOD2
4_Member	GO Biological Processes	GO:0080135	regulation of cellular response to stress	-3.16883	-1.75909	10/723	1956,2534,3146,3552,3553,5371,5743,7098,10062,64127	EGFR,FYN,HMGB1,IL1A,IL1B,PML,PTGS2,TLR3,NR1H3,NOD2
4_Member	GO Biological Processes	GO:0032663	regulation of interleukin-2 production	-2.67956	-1.32982	3/63	3552,3553,64127	IL1A,IL1B,NOD2
4_Member	GO Biological Processes	GO:0031331	positive regulation of cellular catabolic process	-2.01416	-0.724433	6/450	154,3146,3553,3569,4035,64127	ADRB2,HMGB1,IL1B,IL6,LRP1,NOD2
5_Summary	GO Biological Processes	GO:0001775	cell activation	-20.4336	-17.2691	28/647	933,1437,1907,2243,2534,3105,3146,3383,3553,3569,3576,3627,3689,3725,4035,4277,5154,5971,6095,6348,6352,7097,7098,10148,10451,54567,55716,91543,284,1440,2263,3624,5371,7049,30061,133396,3065,4773,7421,10062	CD22,CSF2,EDN2,FGA,FYN,HLA-A,HMGB1,ICAM1,IL1B,IL6,CXCL8,CXCL10,ITGB2,JUN,LRP1,MICB,PDGFA,RELB,RORA,CCL3,CCL5,TLR2,TLR3,EBI3,VAV3,DLL4,LMBR1L,RSAD2,ANGPT1,CSF3,FGFR2,INHBA,PML,TGFBR3,SLC40A1,IL31RA,HDAC1,NFATC2,VDR,NR1H3
5_Member	GO Biological Processes	GO:0001775	cell activation	-20.4336	-17.2691	28/647	933,1437,1907,2243,2534,3105,3146,3383,3553,3569,3576,3627,3689,3725,4035,4277,5154,5971,6095,6348,6352,7097,7098,10148,10451,54567,55716,91543	CD22,CSF2,EDN2,FGA,FYN,HLA-A,HMGB1,ICAM1,IL1B,IL6,CXCL8,CXCL10,ITGB2,JUN,LRP1,MICB,PDGFA,RELB,RORA,CCL3,CCL5,TLR2,TLR3,EBI3,VAV3,DLL4,LMBR1L,RSAD2
5_Member	GO Biological Processes	GO:0045321	leukocyte activation	-15.6929	-12.9487	22/526	933,1437,1907,2534,3105,3146,3383,3569,3576,3689,3725,4277,5971,6095,6348,6352,7097,7098,10148,54567,55716,91543	CD22,CSF2,EDN2,FYN,HLA-A,HMGB1,ICAM1,IL6,CXCL8,ITGB2,JUN,MICB,RELB,RORA,CCL3,CCL5,TLR2,TLR3,EBI3,DLL4,LMBR1L,RSAD2
5_Member	GO Biological Processes	GO:0048534	hematopoietic or lymphoid organ development	-9.84351	-7.62111	18/655	284,1437,1440,2263,3146,3569,3624,3725,5371,5971,6095,7049,7097,30061,54567,55716,91543,133396	ANGPT1,CSF2,CSF3,FGFR2,HMGB1,IL6,INHBA,JUN,PML,RELB,RORA,TGFBR3,TLR2,SLC40A1,DLL4,LMBR1L,RSAD2,IL31RA
5_Member	GO Biological Processes	GO:0030097	hemopoiesis	-9.44859	-7.26213	17/606	284,1437,1440,2263,3146,3569,3624,3725,5371,5971,6095,7049,7097,54567,55716,91543,133396	ANGPT1,CSF2,CSF3,FGFR2,HMGB1,IL6,INHBA,JUN,PML,RELB,RORA,TGFBR3,TLR2,DLL4,LMBR1L,RSAD2,IL31RA
5_Member	GO Biological Processes	GO:0002520	immune system development	-9.39153	-7.20963	18/699	284,1437,1440,2263,3146,3569,3624,3725,5371,5971,6095,7049,7097,30061,54567,55716,91543,133396	ANGPT1,CSF2,CSF3,FGFR2,HMGB1,IL6,INHBA,JUN,PML,RELB,RORA,TGFBR3,TLR2,SLC40A1,DLL4,LMBR1L,RSAD2,IL31RA
5_Member	GO Biological Processes	GO:0042110	T cell activation	-9.0886	-6.92986	12/265	2534,3105,3146,3383,3569,4277,5971,6095,10148,54567,55716,91543	FYN,HLA-A,HMGB1,ICAM1,IL6,MICB,RELB,RORA,EBI3,DLL4,LMBR1L,RSAD2
5_Member	GO Biological Processes	GO:0046649	lymphocyte activation	-7.85248	-5.83866	13/417	933,2534,3105,3146,3383,3569,4277,5971,6095,10148,54567,55716,91543	CD22,FYN,HLA-A,HMGB1,ICAM1,IL6,MICB,RELB,RORA,EBI3,DLL4,LMBR1L,RSAD2
5_Member	GO Biological Processes	GO:0002521	leukocyte differentiation	-7.62735	-5.63903	12/358	1437,1440,3146,3569,3725,5971,6095,7097,54567,55716,91543,133396	CSF2,CSF3,HMGB1,IL6,JUN,RELB,RORA,TLR2,DLL4,LMBR1L,RSAD2,IL31RA
5_Member	GO Biological Processes	GO:1903131	mononuclear cell differentiation	-6.48019	-4.62249	10/295	1437,3146,3569,3725,5971,6095,54567,55716,91543,133396	CSF2,HMGB1,IL6,JUN,RELB,RORA,DLL4,LMBR1L,RSAD2,IL31RA
5_Member	GO Biological Processes	GO:0043367	CD4-positive, alpha-beta T cell differentiation	-6.19753	-4.38223	5/41	3146,3569,5971,6095,91543	HMGB1,IL6,RELB,RORA,RSAD2
5_Member	GO Biological Processes	GO:0046631	alpha-beta T cell activation	-6.13004	-4.3216	6/78	3105,3146,3569,5971,6095,91543	HLA-A,HMGB1,IL6,RELB,RORA,RSAD2
5_Member	GO Biological Processes	GO:0035710	CD4-positive, alpha-beta T cell activation	-5.94223	-4.16769	5/46	3146,3569,5971,6095,91543	HMGB1,IL6,RELB,RORA,RSAD2
5_Member	GO Biological Processes	GO:0030217	T cell differentiation	-5.53633	-3.80917	7/153	3146,3569,5971,6095,54567,55716,91543	HMGB1,IL6,RELB,RORA,DLL4,LMBR1L,RSAD2
5_Member	GO Biological Processes	GO:0046632	alpha-beta T cell differentiation	-5.43479	-3.71896	5/58	3146,3569,5971,6095,91543	HMGB1,IL6,RELB,RORA,RSAD2
5_Member	GO Biological Processes	GO:0002294	CD4-positive, alpha-beta T cell differentiation involved in immune response	-5.03754	-3.38148	4/33	3146,3569,5971,6095	HMGB1,IL6,RELB,RORA
5_Member	GO Biological Processes	GO:0042093	T-helper cell differentiation	-5.03754	-3.38148	4/33	3146,3569,5971,6095	HMGB1,IL6,RELB,RORA
5_Member	GO Biological Processes	GO:0002263	cell activation involved in immune response	-5.0095	-3.35697	7/184	3146,3383,3569,4035,5971,6095,6348	HMGB1,ICAM1,IL6,LRP1,RELB,RORA,CCL3
5_Member	GO Biological Processes	GO:0002287	alpha-beta T cell activation involved in immune response	-4.98453	-3.33811	4/34	3146,3569,5971,6095	HMGB1,IL6,RELB,RORA
5_Member	GO Biological Processes	GO:0002293	alpha-beta T cell differentiation involved in immune response	-4.98453	-3.33811	4/34	3146,3569,5971,6095	HMGB1,IL6,RELB,RORA
5_Member	GO Biological Processes	GO:0002286	T cell activation involved in immune response	-4.96941	-3.32558	5/72	3146,3383,3569,5971,6095	HMGB1,ICAM1,IL6,RELB,RORA
5_Member	GO Biological Processes	GO:0002292	T cell differentiation involved in immune response	-4.78805	-3.16278	4/38	3146,3569,5971,6095	HMGB1,IL6,RELB,RORA
5_Member	GO Biological Processes	GO:0042088	T-helper 1 type immune response	-4.16711	-2.62432	3/20	3146,5971,10148	HMGB1,RELB,EBI3
5_Member	GO Biological Processes	GO:0030098	lymphocyte differentiation	-4.08363	-2.54895	7/257	3146,3569,5971,6095,54567,55716,91543	HMGB1,IL6,RELB,RORA,DLL4,LMBR1L,RSAD2
5_Member	GO Biological Processes	GO:0002366	leukocyte activation involved in immune response	-4.04609	-2.51806	6/180	3146,3383,3569,5971,6095,6348	HMGB1,ICAM1,IL6,RELB,RORA,CCL3
5_Member	GO Biological Processes	GO:0001773	myeloid dendritic cell activation	-3.92289	-2.40787	3/24	1437,3146,5971	CSF2,HMGB1,RELB
5_Member	GO Biological Processes	GO:0002285	lymphocyte activation involved in immune response	-3.83477	-2.33424	5/124	3146,3383,3569,5971,6095	HMGB1,ICAM1,IL6,RELB,RORA
5_Member	GO Cellular Components	GO:0017053	transcription repressor complex	-3.59894	-2.12774	4/76	3065,3146,3725,5971	HDAC1,HMGB1,JUN,RELB
5_Member	GO Cellular Components	GO:0005667	transcription regulator complex	-2.41182	-1.08964	7/495	3065,3146,3725,4773,5971,7421,10062	HDAC1,HMGB1,JUN,NFATC2,RELB,VDR,NR1H3
6_Summary	GO Biological Processes	GO:0002697	regulation of immune effector process	-19.2824	-16.2786	22/356	284,718,933,3077,3105,3106,3109,3134,3136,3146,3383,3553,3569,3689,5724,5880,7098,8482,64127,64332,79132,91543,727,2534,4277,4773,6352,9641,10451,3107,154,1440,1956,4035,7097,7791,5971,153,5371,309,4803,4922,7425,30061,7057,2634,5154	ANGPT1,C3,CD22,HFE,HLA-A,HLA-B,HLA-DMB,HLA-F,HLA-H,HMGB1,ICAM1,IL1B,IL6,ITGB2,PTAFR,RAC2,TLR3,SEMA7A,NOD2,NFKBIZ,DHX58,RSAD2,C5,FYN,MICB,NFATC2,CCL5,IKBKE,VAV3,HLA-C,ADRB2,CSF3,EGFR,LRP1,TLR2,ZYX,RELB,ADRB1,PML,ANXA6,NGF,NTS,VGF,SLC40A1,THBS1,GBP2,PDGFA
6_Member	GO Biological Processes	GO:0002697	regulation of immune effector process	-19.2824	-16.2786	22/356	284,718,933,3077,3105,3106,3109,3134,3136,3146,3383,3553,3569,3689,5724,5880,7098,8482,64127,64332,79132,91543	ANGPT1,C3,CD22,HFE,HLA-A,HLA-B,HLA-DMB,HLA-F,HLA-H,HMGB1,ICAM1,IL1B,IL6,ITGB2,PTAFR,RAC2,TLR3,SEMA7A,NOD2,NFKBIZ,DHX58,RSAD2
6_Member	GO Biological Processes	GO:0002703	regulation of leukocyte mediated immunity	-14.6976	-12.0141	16/236	718,3077,3105,3106,3134,3136,3146,3383,3553,3569,3689,5724,5880,7098,64127,91543	C3,HFE,HLA-A,HLA-B,HLA-F,HLA-H,HMGB1,ICAM1,IL1B,IL6,ITGB2,PTAFR,RAC2,TLR3,NOD2,RSAD2
6_Member	GO Biological Processes	GO:0002699	positive regulation of immune effector process	-14.3316	-11.6755	16/249	718,3105,3106,3109,3134,3136,3553,3569,3689,5724,5880,8482,64127,64332,79132,91543	C3,HLA-A,HLA-B,HLA-DMB,HLA-F,HLA-H,IL1B,IL6,ITGB2,PTAFR,RAC2,SEMA7A,NOD2,NFKBIZ,DHX58,RSAD2
6_Member	GO Biological Processes	GO:0050778	positive regulation of immune response	-13.9406	-11.3187	21/567	718,727,2534,3105,3106,3109,3134,3136,3146,3553,3569,3689,4277,4773,5724,6352,9641,10451,64127,64332,91543	C3,C5,FYN,HLA-A,HLA-B,HLA-DMB,HLA-F,HLA-H,HMGB1,IL1B,IL6,ITGB2,MICB,NFATC2,PTAFR,CCL5,IKBKE,VAV3,NOD2,NFKBIZ,RSAD2
6_Member	GO Biological Processes	GO:0002709	regulation of T cell mediated immunity	-11.5961	-9.16892	10/88	3077,3105,3106,3134,3136,3146,3553,3569,64127,91543	HFE,HLA-A,HLA-B,HLA-F,HLA-H,HMGB1,IL1B,IL6,NOD2,RSAD2
6_Member	GO Biological Processes	GO:0002822	regulation of adaptive immune response based on somatic recombination of immune receptors built from immunoglobulin superfamily domains	-11.1198	-8.7411	12/177	718,3077,3105,3106,3134,3136,3146,3553,3569,64127,64332,91543	C3,HFE,HLA-A,HLA-B,HLA-F,HLA-H,HMGB1,IL1B,IL6,NOD2,NFKBIZ,RSAD2
6_Member	GO Biological Processes	GO:0002718	regulation of cytokine production involved in immune response	-11.1189	-8.7411	10/98	284,3077,3105,3134,3553,3569,7098,8482,64127,91543	ANGPT1,HFE,HLA-A,HLA-F,IL1B,IL6,TLR3,SEMA7A,NOD2,RSAD2
6_Member	GO Biological Processes	GO:0002705	positive regulation of leukocyte mediated immunity	-10.9965	-8.63698	11/138	718,3105,3106,3134,3136,3553,3569,3689,5724,64127,91543	C3,HLA-A,HLA-B,HLA-F,HLA-H,IL1B,IL6,ITGB2,PTAFR,NOD2,RSAD2
6_Member	GO Biological Processes	GO:0002819	regulation of adaptive immune response	-10.7045	-8.38351	12/192	718,3077,3105,3106,3134,3136,3146,3553,3569,64127,64332,91543	C3,HFE,HLA-A,HLA-B,HLA-F,HLA-H,HMGB1,IL1B,IL6,NOD2,NFKBIZ,RSAD2
6_Member	GO Biological Processes	GO:0002824	positive regulation of adaptive immune response based on somatic recombination of immune receptors built from immunoglobulin superfamily domains	-10.5328	-8.24341	10/112	718,3105,3106,3134,3136,3553,3569,64127,64332,91543	C3,HLA-A,HLA-B,HLA-F,HLA-H,IL1B,IL6,NOD2,NFKBIZ,RSAD2
6_Member	GO Biological Processes	GO:0002821	positive regulation of adaptive immune response	-10.3425	-8.06439	10/117	718,3105,3106,3134,3136,3553,3569,64127,64332,91543	C3,HLA-A,HLA-B,HLA-F,HLA-H,IL1B,IL6,NOD2,NFKBIZ,RSAD2
6_Member	GO Biological Processes	GO:0002484	antigen processing and presentation of endogenous peptide antigen via MHC class I via ER pathway	-10.2782	-8.02181	5/8	3105,3106,3107,3134,3136	HLA-A,HLA-B,HLA-C,HLA-F,HLA-H
6_Member	GO Biological Processes	GO:0002486	antigen processing and presentation of endogenous peptide antigen via MHC class I via ER pathway, TAP-independent	-10.2782	-8.02181	5/8	3105,3106,3107,3134,3136	HLA-A,HLA-B,HLA-C,HLA-F,HLA-H
6_Member	GO Biological Processes	GO:0002700	regulation of production of molecular mediator of immune response	-10.0959	-7.86024	11/167	284,933,3077,3105,3134,3553,3569,7098,8482,64127,91543	ANGPT1,CD22,HFE,HLA-A,HLA-F,IL1B,IL6,TLR3,SEMA7A,NOD2,RSAD2
6_Member	GO Cellular Components	GO:0042612	MHC class I protein complex	-9.92737	-7.69838	5/9	3105,3106,3107,3134,3136	HLA-A,HLA-B,HLA-C,HLA-F,HLA-H
6_Member	GO Biological Processes	GO:0002706	regulation of lymphocyte mediated immunity	-9.87719	-7.6515	11/175	718,3077,3105,3106,3134,3136,3146,3553,3569,64127,91543	C3,HFE,HLA-A,HLA-B,HLA-F,HLA-H,HMGB1,IL1B,IL6,NOD2,RSAD2
6_Member	GO Cellular Components	GO:0042611	MHC protein complex	-9.21637	-7.05196	6/25	3105,3106,3107,3109,3134,3136	HLA-A,HLA-B,HLA-C,HLA-DMB,HLA-F,HLA-H
6_Member	GO Biological Processes	GO:0002708	positive regulation of lymphocyte mediated immunity	-8.94648	-6.79888	9/117	718,3105,3106,3134,3136,3553,3569,64127,91543	C3,HLA-A,HLA-B,HLA-F,HLA-H,IL1B,IL6,NOD2,RSAD2
6_Member	GO Cellular Components	GO:0030139	endocytic vesicle	-8.88124	-6.74181	13/342	154,1440,1956,3105,3106,3107,3134,3136,4035,5880,7097,7791,64127	ADRB2,CSF3,EGFR,HLA-A,HLA-B,HLA-C,HLA-F,HLA-H,LRP1,RAC2,TLR2,ZYX,NOD2
6_Member	GO Biological Processes	GO:0002711	positive regulation of T cell mediated immunity	-8.39856	-6.31573	7/59	3105,3106,3134,3136,3553,3569,91543	HLA-A,HLA-B,HLA-F,HLA-H,IL1B,IL6,RSAD2
6_Member	GO Biological Processes	GO:0019885	antigen processing and presentation of endogenous peptide antigen via MHC class I	-8.3972	-6.31573	5/16	3105,3106,3107,3134,3136	HLA-A,HLA-B,HLA-C,HLA-F,HLA-H
6_Member	GO Biological Processes	GO:0019882	antigen processing and presentation	-8.39481	-6.31573	8/93	3105,3106,3107,3109,3134,3136,3383,5971	HLA-A,HLA-B,HLA-C,HLA-DMB,HLA-F,HLA-H,ICAM1,RELB
6_Member	GO Cellular Components	GO:0045335	phagocytic vesicle	-8.31043	-6.24064	9/138	3105,3106,3107,3134,3136,5880,7097,7791,64127	HLA-A,HLA-B,HLA-C,HLA-F,HLA-H,RAC2,TLR2,ZYX,NOD2
6_Member	GO Cellular Components	GO:0030666	endocytic vesicle membrane	-8.18896	-6.13274	10/194	154,1956,3105,3106,3107,3134,3136,4035,5880,7097	ADRB2,EGFR,HLA-A,HLA-B,HLA-C,HLA-F,HLA-H,LRP1,RAC2,TLR2
6_Member	GO Biological Processes	GO:0002483	antigen processing and presentation of endogenous peptide antigen	-8.10738	-6.06216	5/18	3105,3106,3107,3134,3136	HLA-A,HLA-B,HLA-C,HLA-F,HLA-H
6_Member	GO Biological Processes	GO:0002724	regulation of T cell cytokine production	-8.04202	-6.00111	6/38	3077,3105,3134,3553,3569,91543	HFE,HLA-A,HLA-F,IL1B,IL6,RSAD2
6_Member	GO Biological Processes	GO:0002720	positive regulation of cytokine production involved in immune response	-7.9579	-5.92761	7/68	3105,3134,3553,3569,8482,64127,91543	HLA-A,HLA-F,IL1B,IL6,SEMA7A,NOD2,RSAD2
6_Member	GO Cellular Components	GO:0005769	early endosome	-7.93931	-5.91527	13/410	153,154,933,1956,3077,3105,3106,3107,3134,3136,4035,5371,7098	ADRB1,ADRB2,CD22,EGFR,HFE,HLA-A,HLA-B,HLA-C,HLA-F,HLA-H,LRP1,PML,TLR3
6_Member	GO Molecular Functions	GO:0030881	beta-2-microglobulin binding	-7.77073	-5.77278	4/8	3077,3105,3134,3136	HFE,HLA-A,HLA-F,HLA-H
6_Member	GO Molecular Functions	GO:0046977	TAP binding	-7.77073	-5.77278	4/8	3105,3106,3107,3134	HLA-A,HLA-B,HLA-C,HLA-F
6_Member	GO Cellular Components	GO:0030670	phagocytic vesicle membrane	-7.57625	-5.59361	7/77	3105,3106,3107,3134,3136,5880,7097	HLA-A,HLA-B,HLA-C,HLA-F,HLA-H,RAC2,TLR2
6_Member	GO Biological Processes	GO:0019883	antigen processing and presentation of endogenous antigen	-7.32466	-5.36222	5/25	3105,3106,3107,3134,3136	HLA-A,HLA-B,HLA-C,HLA-F,HLA-H
6_Member	GO Biological Processes	GO:0002474	antigen processing and presentation of peptide antigen via MHC class I	-7.06171	-5.12199	5/28	3105,3106,3107,3134,3136	HLA-A,HLA-B,HLA-C,HLA-F,HLA-H
6_Member	GO Cellular Components	GO:0071556	integral component of lumenal side of endoplasmic reticulum membrane	-6.98091	-5.05296	5/29	3105,3106,3107,3134,3136	HLA-A,HLA-B,HLA-C,HLA-F,HLA-H
6_Member	GO Cellular Components	GO:0098553	lumenal side of endoplasmic reticulum membrane	-6.98091	-5.05296	5/29	3105,3106,3107,3134,3136	HLA-A,HLA-B,HLA-C,HLA-F,HLA-H
6_Member	GO Biological Processes	GO:0048002	antigen processing and presentation of peptide antigen	-6.8147	-4.91249	6/60	3105,3106,3107,3109,3134,3136	HLA-A,HLA-B,HLA-C,HLA-DMB,HLA-F,HLA-H
6_Member	GO Cellular Components	GO:0098576	lumenal side of membrane	-6.55252	-4.68193	5/35	3105,3106,3107,3134,3136	HLA-A,HLA-B,HLA-C,HLA-F,HLA-H
6_Member	GO Molecular Functions	GO:0042605	peptide antigen binding	-6.48896	-4.62843	5/36	3105,3106,3107,3134,3136	HLA-A,HLA-B,HLA-C,HLA-F,HLA-H
6_Member	GO Biological Processes	GO:0002698	negative regulation of immune effector process	-6.44849	-4.59753	7/112	284,933,3077,3105,3106,3134,64127	ANGPT1,CD22,HFE,HLA-A,HLA-B,HLA-F,NOD2
6_Member	GO Biological Processes	GO:0016045	detection of bacterium	-6.25137	-4.42099	4/17	3105,3106,7097,64127	HLA-A,HLA-B,TLR2,NOD2
6_Member	GO Biological Processes	GO:0002702	positive regulation of production of molecular mediator of immune response	-6.24457	-4.41683	7/120	3105,3134,3553,3569,8482,64127,91543	HLA-A,HLA-F,IL1B,IL6,SEMA7A,NOD2,RSAD2
6_Member	GO Biological Processes	GO:0098543	detection of other organism	-5.94669	-4.16864	4/20	3105,3106,7097,64127	HLA-A,HLA-B,TLR2,NOD2
6_Member	GO Biological Processes	GO:0002707	negative regulation of lymphocyte mediated immunity	-5.55026	-3.81996	5/55	3077,3105,3106,3134,64127	HFE,HLA-A,HLA-B,HLA-F,NOD2
6_Member	GO Biological Processes	GO:0098581	detection of external biotic stimulus	-5.53663	-3.80917	4/25	3105,3106,7097,64127	HLA-A,HLA-B,TLR2,NOD2
6_Member	GO Biological Processes	GO:0002726	positive regulation of T cell cytokine production	-5.46542	-3.74653	4/26	3105,3553,3569,91543	HLA-A,IL1B,IL6,RSAD2
6_Member	GO Cellular Components	GO:0012507	ER to Golgi transport vesicle membrane	-5.29043	-3.59642	5/62	3105,3106,3107,3134,3136	HLA-A,HLA-B,HLA-C,HLA-F,HLA-H
6_Member	GO Biological Processes	GO:0001916	positive regulation of T cell mediated cytotoxicity	-5.20761	-3.52788	4/30	3105,3106,3134,3136	HLA-A,HLA-B,HLA-F,HLA-H
6_Member	GO Biological Processes	GO:0002704	negative regulation of leukocyte mediated immunity	-5.12347	-3.45208	5/67	3077,3105,3106,3134,64127	HFE,HLA-A,HLA-B,HLA-F,NOD2
6_Member	GO Cellular Components	GO:0031901	early endosome membrane	-5.02492	-3.37151	7/183	1956,3105,3106,3107,3134,3136,5371	EGFR,HLA-A,HLA-B,HLA-C,HLA-F,HLA-H,PML
6_Member	GO Cellular Components	GO:0010008	endosome membrane	-4.94569	-3.30272	11/538	154,309,1956,3105,3106,3107,3109,3134,3136,5371,7098	ADRB2,ANXA6,EGFR,HLA-A,HLA-B,HLA-C,HLA-DMB,HLA-F,HLA-H,PML,TLR3
6_Member	GO Cellular Components	GO:0055037	recycling endosome	-4.83149	-3.2004	7/196	933,3077,3105,3106,3107,3134,3136	CD22,HFE,HLA-A,HLA-B,HLA-C,HLA-F,HLA-H
6_Member	GO Cellular Components	GO:0030662	coated vesicle membrane	-4.81721	-3.18862	7/197	154,1956,3105,3106,3107,3134,3136	ADRB2,EGFR,HLA-A,HLA-B,HLA-C,HLA-F,HLA-H
6_Member	GO Biological Processes	GO:0002701	negative regulation of production of molecular mediator of immune response	-4.78805	-3.16278	4/38	284,933,3077,3134	ANGPT1,CD22,HFE,HLA-F
6_Member	GO Biological Processes	GO:0009595	detection of biotic stimulus	-4.7424	-3.12287	4/39	3105,3106,7097,64127	HLA-A,HLA-B,TLR2,NOD2
6_Member	GO Biological Processes	GO:0001914	regulation of T cell mediated cytotoxicity	-4.69799	-3.08332	4/40	3105,3106,3134,3136	HLA-A,HLA-B,HLA-F,HLA-H
6_Member	GO Biological Processes	GO:0001910	regulation of leukocyte mediated cytotoxicity	-4.6174	-3.01622	5/85	3105,3106,3134,3136,3383	HLA-A,HLA-B,HLA-F,HLA-H,ICAM1
6_Member	GO Cellular Components	GO:0030134	COPII-coated ER to Golgi transport vesicle	-4.40626	-2.83159	5/94	3105,3106,3107,3134,3136	HLA-A,HLA-B,HLA-C,HLA-F,HLA-H
6_Member	GO Cellular Components	GO:0055038	recycling endosome membrane	-4.36231	-2.79493	5/96	3105,3106,3107,3134,3136	HLA-A,HLA-B,HLA-C,HLA-F,HLA-H
6_Member	GO Cellular Components	GO:0030133	transport vesicle	-4.31467	-2.75484	9/417	3105,3106,3107,3134,3136,4803,4922,7425,30061	HLA-A,HLA-B,HLA-C,HLA-F,HLA-H,NGF,NTS,VGF,SLC40A1
6_Member	GO Biological Processes	GO:0031341	regulation of cell killing	-4.27734	-2.72137	5/100	3105,3106,3134,3136,3383	HLA-A,HLA-B,HLA-F,HLA-H,ICAM1
6_Member	GO Biological Processes	GO:0045953	negative regulation of natural killer cell mediated cytotoxicity	-4.23642	-2.68516	3/19	3105,3106,3134	HLA-A,HLA-B,HLA-F
6_Member	GO Biological Processes	GO:0002577	regulation of antigen processing and presentation	-4.16711	-2.62432	3/20	3077,7057,64127	HFE,THBS1,NOD2
6_Member	GO Biological Processes	GO:0002716	negative regulation of natural killer cell mediated immunity	-4.16711	-2.62432	3/20	3105,3106,3134	HLA-A,HLA-B,HLA-F
6_Member	GO Biological Processes	GO:0001912	positive regulation of leukocyte mediated cytotoxicity	-4.0554	-2.52539	4/58	3105,3106,3134,3136	HLA-A,HLA-B,HLA-F,HLA-H
6_Member	GO Biological Processes	GO:0001911	negative regulation of leukocyte mediated cytotoxicity	-3.86864	-2.36551	3/25	3105,3106,3134	HLA-A,HLA-B,HLA-F
6_Member	GO Biological Processes	GO:0031343	positive regulation of cell killing	-3.86181	-2.36003	4/65	3105,3106,3134,3136	HLA-A,HLA-B,HLA-F,HLA-H
6_Member	GO Biological Processes	GO:0002710	negative regulation of T cell mediated immunity	-3.76679	-2.27726	3/27	3077,3134,64127	HFE,HLA-F,NOD2
6_Member	GO Biological Processes	GO:0002719	negative regulation of cytokine production involved in immune response	-3.76679	-2.27726	3/27	284,3077,3134	ANGPT1,HFE,HLA-F
6_Member	GO Biological Processes	GO:0031342	negative regulation of cell killing	-3.71884	-2.23172	3/28	3105,3106,3134	HLA-A,HLA-B,HLA-F
6_Member	GO Cellular Components	GO:0030135	coated vesicle	-3.59154	-2.12092	7/309	154,1956,3105,3106,3107,3134,3136	ADRB2,EGFR,HLA-A,HLA-B,HLA-C,HLA-F,HLA-H
6_Member	GO Biological Processes	GO:0002478	antigen processing and presentation of exogenous peptide antigen	-3.32073	-1.88882	3/38	3105,3109,3134	HLA-A,HLA-DMB,HLA-F
6_Member	GO Cellular Components	GO:0030176	integral component of endoplasmic reticulum membrane	-3.27411	-1.85006	5/164	3105,3106,3107,3134,3136	HLA-A,HLA-B,HLA-C,HLA-F,HLA-H
6_Member	GO Cellular Components	GO:0031227	intrinsic component of endoplasmic reticulum membrane	-3.18045	-1.7692	5/172	3105,3106,3107,3134,3136	HLA-A,HLA-B,HLA-C,HLA-F,HLA-H
6_Member	GO Molecular Functions	GO:0003823	antigen binding	-3.16909	-1.75909	5/173	3105,3106,3107,3134,3136	HLA-A,HLA-B,HLA-C,HLA-F,HLA-H
6_Member	GO Biological Processes	GO:0042269	regulation of natural killer cell mediated cytotoxicity	-3.07572	-1.67739	3/46	3105,3106,3134	HLA-A,HLA-B,HLA-F
6_Member	GO Biological Processes	GO:0019884	antigen processing and presentation of exogenous antigen	-3.04834	-1.65294	3/47	3105,3109,3134	HLA-A,HLA-DMB,HLA-F
6_Member	GO Biological Processes	GO:0002715	regulation of natural killer cell mediated immunity	-2.9698	-1.58544	3/50	3105,3106,3134	HLA-A,HLA-B,HLA-F
6_Member	GO Biological Processes	GO:0002823	negative regulation of adaptive immune response based on somatic recombination of immune receptors built from immunoglobulin superfamily domains	-2.87259	-1.49761	3/54	3077,3134,64127	HFE,HLA-F,NOD2
6_Member	GO Cellular Components	GO:0000139	Golgi membrane	-2.84809	-1.47635	9/662	1956,2634,3105,3106,3107,3134,3136,5154,7098	EGFR,GBP2,HLA-A,HLA-B,HLA-C,HLA-F,HLA-H,PDGFA,TLR3
6_Member	GO Biological Processes	GO:0002820	negative regulation of adaptive immune response	-2.76142	-1.39879	3/59	3077,3134,64127	HFE,HLA-F,NOD2
6_Member	GO Cellular Components	GO:0030658	transport vesicle membrane	-2.71495	-1.35947	5/219	3105,3106,3107,3134,3136	HLA-A,HLA-B,HLA-C,HLA-F,HLA-H
7_Summary	GO Biological Processes	GO:0032102	negative regulation of response to external stimulus	-18.8039	-15.8194	23/428	350,384,727,2243,2534,3105,3106,3134,4277,5154,5328,6095,7057,7349,7448,8482,9636,10062,10501,10509,57556,64127,79132,284,933,3077,3146,3624,6348,7098,133396,3553,6352,9641,163702	APOH,ARG2,C5,FGA,FYN,HLA-A,HLA-B,HLA-F,MICB,PDGFA,PLAU,RORA,THBS1,UCN,VTN,SEMA7A,ISG15,NR1H3,SEMA6B,SEMA4B,SEMA6A,NOD2,DHX58,ANGPT1,CD22,HFE,HMGB1,INHBA,CCL3,TLR3,IL31RA,IL1B,CCL5,IKBKE,IFNLR1
7_Member	GO Biological Processes	GO:0032102	negative regulation of response to external stimulus	-18.8039	-15.8194	23/428	350,384,727,2243,2534,3105,3106,3134,4277,5154,5328,6095,7057,7349,7448,8482,9636,10062,10501,10509,57556,64127,79132	APOH,ARG2,C5,FGA,FYN,HLA-A,HLA-B,HLA-F,MICB,PDGFA,PLAU,RORA,THBS1,UCN,VTN,SEMA7A,ISG15,NR1H3,SEMA6B,SEMA4B,SEMA6A,NOD2,DHX58
7_Member	GO Biological Processes	GO:0002683	negative regulation of immune system process	-13.9931	-11.3628	19/430	284,384,727,933,2534,3077,3105,3106,3134,3146,3624,6348,7057,7098,9636,10062,64127,79132,133396	ANGPT1,ARG2,C5,CD22,FYN,HFE,HLA-A,HLA-B,HLA-F,HMGB1,INHBA,CCL3,THBS1,TLR3,ISG15,NR1H3,NOD2,DHX58,IL31RA
7_Member	GO Biological Processes	GO:0002831	regulation of response to biotic stimulus	-10.831	-8.49335	15/355	384,2534,3105,3106,3134,3146,3553,4277,6352,9636,9641,10062,64127,79132,163702	ARG2,FYN,HLA-A,HLA-B,HLA-F,HMGB1,IL1B,MICB,CCL5,ISG15,IKBKE,NR1H3,NOD2,DHX58,IFNLR1
7_Member	GO Biological Processes	GO:0045088	regulation of innate immune response	-8.50075	-6.39754	11/236	2534,3105,3106,3134,3146,6352,9636,9641,10062,64127,79132	FYN,HLA-A,HLA-B,HLA-F,HMGB1,CCL5,ISG15,IKBKE,NR1H3,NOD2,DHX58
7_Member	GO Biological Processes	GO:0050777	negative regulation of immune response	-8.43274	-6.3357	10/183	384,2534,3077,3105,3106,3134,9636,10062,64127,79132	ARG2,FYN,HFE,HLA-A,HLA-B,HLA-F,ISG15,NR1H3,NOD2,DHX58
7_Member	GO Biological Processes	GO:0031348	negative regulation of defense response	-7.91075	-5.88878	11/269	384,2534,3105,3106,3134,4277,6095,9636,10062,64127,79132	ARG2,FYN,HLA-A,HLA-B,HLA-F,MICB,RORA,ISG15,NR1H3,NOD2,DHX58
7_Member	GO Biological Processes	GO:0002832	negative regulation of response to biotic stimulus	-7.72262	-5.72855	8/113	384,3105,3106,3134,4277,9636,10062,79132	ARG2,HLA-A,HLA-B,HLA-F,MICB,ISG15,NR1H3,DHX58
7_Member	GO Biological Processes	GO:0045824	negative regulation of innate immune response	-6.2315	-4.40769	6/75	3105,3106,3134,9636,10062,79132	HLA-A,HLA-B,HLA-F,ISG15,NR1H3,DHX58
7_Member	GO Biological Processes	GO:0002833	positive regulation of response to biotic stimulus	-4.99418	-3.34428	7/185	2534,3134,3146,6352,9641,64127,79132	FYN,HLA-F,HMGB1,CCL5,IKBKE,NOD2,DHX58
7_Member	GO Biological Processes	GO:0045089	positive regulation of innate immune response	-4.58603	-2.98874	6/144	2534,3134,3146,6352,9641,64127	FYN,HLA-F,HMGB1,CCL5,IKBKE,NOD2
8_Summary	GO Biological Processes	GO:0050865	regulation of cell activation	-18.2696	-15.3219	27/709	384,933,2534,3077,3105,3109,3134,3146,3552,3553,3569,3624,3689,4773,5154,5724,5880,6095,6348,6352,7057,10062,10148,10451,64127,64332,133396,94,284,2243,3576,5328,5371,7448,57556,1437,7098,9636	ARG2,CD22,FYN,HFE,HLA-A,HLA-DMB,HLA-F,HMGB1,IL1A,IL1B,IL6,INHBA,ITGB2,NFATC2,PDGFA,PTAFR,RAC2,RORA,CCL3,CCL5,THBS1,NR1H3,EBI3,VAV3,NOD2,NFKBIZ,IL31RA,ACVRL1,ANGPT1,FGA,CXCL8,PLAU,PML,VTN,SEMA6A,CSF2,TLR3,ISG15
8_Member	GO Biological Processes	GO:0050865	regulation of cell activation	-18.2696	-15.3219	27/709	384,933,2534,3077,3105,3109,3134,3146,3552,3553,3569,3624,3689,4773,5154,5724,5880,6095,6348,6352,7057,10062,10148,10451,64127,64332,133396	ARG2,CD22,FYN,HFE,HLA-A,HLA-DMB,HLA-F,HMGB1,IL1A,IL1B,IL6,INHBA,ITGB2,NFATC2,PDGFA,PTAFR,RAC2,RORA,CCL3,CCL5,THBS1,NR1H3,EBI3,VAV3,NOD2,NFKBIZ,IL31RA
8_Member	GO Biological Processes	GO:0002694	regulation of leukocyte activation	-18.0354	-15.1205	26/654	384,933,2534,3077,3105,3109,3134,3146,3552,3553,3569,3624,3689,4773,5724,5880,6095,6348,6352,7057,10062,10148,10451,64127,64332,133396	ARG2,CD22,FYN,HFE,HLA-A,HLA-DMB,HLA-F,HMGB1,IL1A,IL1B,IL6,INHBA,ITGB2,NFATC2,PTAFR,RAC2,RORA,CCL3,CCL5,THBS1,NR1H3,EBI3,VAV3,NOD2,NFKBIZ,IL31RA
8_Member	GO Biological Processes	GO:0030155	regulation of cell adhesion	-16.0997	-13.3217	26/786	94,284,384,2243,2534,3077,3105,3109,3146,3552,3553,3569,3576,3689,5328,5371,5724,5880,6352,7057,7448,10148,10451,57556,64127,64332	ACVRL1,ANGPT1,ARG2,FGA,FYN,HFE,HLA-A,HLA-DMB,HMGB1,IL1A,IL1B,IL6,CXCL8,ITGB2,PLAU,PML,PTAFR,RAC2,CCL5,THBS1,VTN,EBI3,VAV3,SEMA6A,NOD2,NFKBIZ
8_Member	GO Biological Processes	GO:0002696	positive regulation of leukocyte activation	-12.6819	-10.1209	18/441	2534,3105,3109,3134,3146,3552,3553,3569,3689,4773,5724,6348,6352,7057,10148,10451,64127,64332	FYN,HLA-A,HLA-DMB,HLA-F,HMGB1,IL1A,IL1B,IL6,ITGB2,NFATC2,PTAFR,CCL3,CCL5,THBS1,EBI3,VAV3,NOD2,NFKBIZ
8_Member	GO Biological Processes	GO:0050867	positive regulation of cell activation	-12.4046	-9.87785	18/458	2534,3105,3109,3134,3146,3552,3553,3569,3689,4773,5724,6348,6352,7057,10148,10451,64127,64332	FYN,HLA-A,HLA-DMB,HLA-F,HMGB1,IL1A,IL1B,IL6,ITGB2,NFATC2,PTAFR,CCL3,CCL5,THBS1,EBI3,VAV3,NOD2,NFKBIZ
8_Member	GO Biological Processes	GO:0051249	regulation of lymphocyte activation	-11.9966	-9.53688	19/557	384,933,2534,3077,3105,3109,3134,3146,3552,3553,3569,3624,4773,5880,6352,10148,10451,64127,64332	ARG2,CD22,FYN,HFE,HLA-A,HLA-DMB,HLA-F,HMGB1,IL1A,IL1B,IL6,INHBA,NFATC2,RAC2,CCL5,EBI3,VAV3,NOD2,NFKBIZ
8_Member	GO Biological Processes	GO:0070663	regulation of leukocyte proliferation	-11.653	-9.21527	14/255	384,933,1437,3105,3109,3146,3552,3553,3569,4773,5880,6352,10148,10451	ARG2,CD22,CSF2,HLA-A,HLA-DMB,HMGB1,IL1A,IL1B,IL6,NFATC2,RAC2,CCL5,EBI3,VAV3
8_Member	GO Biological Processes	GO:0050670	regulation of lymphocyte proliferation	-10.9847	-8.6297	13/231	384,933,3105,3109,3146,3552,3553,3569,4773,5880,6352,10148,10451	ARG2,CD22,HLA-A,HLA-DMB,HMGB1,IL1A,IL1B,IL6,NFATC2,RAC2,CCL5,EBI3,VAV3
8_Member	GO Biological Processes	GO:0032944	regulation of mononuclear cell proliferation	-10.9143	-8.56802	13/234	384,933,3105,3109,3146,3552,3553,3569,4773,5880,6352,10148,10451	ARG2,CD22,HLA-A,HLA-DMB,HMGB1,IL1A,IL1B,IL6,NFATC2,RAC2,CCL5,EBI3,VAV3
8_Member	GO Biological Processes	GO:1903037	regulation of leukocyte cell-cell adhesion	-10.6776	-8.36478	15/364	384,2534,3077,3105,3109,3146,3552,3553,3569,3689,5724,6352,10148,64127,64332	ARG2,FYN,HFE,HLA-A,HLA-DMB,HMGB1,IL1A,IL1B,IL6,ITGB2,PTAFR,CCL5,EBI3,NOD2,NFKBIZ
8_Member	GO Biological Processes	GO:0022409	positive regulation of cell-cell adhesion	-10.4796	-8.19401	14/312	2243,2534,3105,3109,3146,3552,3553,3569,3689,5724,6352,10148,64127,64332	FGA,FYN,HLA-A,HLA-DMB,HMGB1,IL1A,IL1B,IL6,ITGB2,PTAFR,CCL5,EBI3,NOD2,NFKBIZ
8_Member	GO Biological Processes	GO:0070665	positive regulation of leukocyte proliferation	-10.3263	-8.05193	11/159	1437,3105,3109,3146,3552,3553,3569,4773,6352,10148,10451	CSF2,HLA-A,HLA-DMB,HMGB1,IL1A,IL1B,IL6,NFATC2,CCL5,EBI3,VAV3
8_Member	GO Biological Processes	GO:1903039	positive regulation of leukocyte cell-cell adhesion	-10.2393	-7.99258	13/265	2534,3105,3109,3146,3552,3553,3569,3689,5724,6352,10148,64127,64332	FYN,HLA-A,HLA-DMB,HMGB1,IL1A,IL1B,IL6,ITGB2,PTAFR,CCL5,EBI3,NOD2,NFKBIZ
8_Member	GO Biological Processes	GO:0045785	positive regulation of cell adhesion	-10.1188	-7.87976	16/471	284,2243,2534,3105,3109,3146,3552,3553,3569,3689,5724,6352,10148,10451,64127,64332	ANGPT1,FGA,FYN,HLA-A,HLA-DMB,HMGB1,IL1A,IL1B,IL6,ITGB2,PTAFR,CCL5,EBI3,VAV3,NOD2,NFKBIZ
8_Member	GO Biological Processes	GO:0022407	regulation of cell-cell adhesion	-10.038	-7.80573	16/477	384,2243,2534,3077,3105,3109,3146,3552,3553,3569,3689,5724,6352,10148,64127,64332	ARG2,FGA,FYN,HFE,HLA-A,HLA-DMB,HMGB1,IL1A,IL1B,IL6,ITGB2,PTAFR,CCL5,EBI3,NOD2,NFKBIZ
8_Member	GO Biological Processes	GO:0050863	regulation of T cell activation	-9.59893	-7.39509	14/364	384,2534,3077,3105,3109,3146,3552,3553,3569,5880,6352,10148,64127,64332	ARG2,FYN,HFE,HLA-A,HLA-DMB,HMGB1,IL1A,IL1B,IL6,RAC2,CCL5,EBI3,NOD2,NFKBIZ
8_Member	GO Biological Processes	GO:0050671	positive regulation of lymphocyte proliferation	-9.50685	-7.30981	10/142	3105,3109,3146,3552,3553,3569,4773,6352,10148,10451	HLA-A,HLA-DMB,HMGB1,IL1A,IL1B,IL6,NFATC2,CCL5,EBI3,VAV3
8_Member	GO Biological Processes	GO:0032946	positive regulation of mononuclear cell proliferation	-9.44701	-7.26213	10/144	3105,3109,3146,3552,3553,3569,4773,6352,10148,10451	HLA-A,HLA-DMB,HMGB1,IL1A,IL1B,IL6,NFATC2,CCL5,EBI3,VAV3
8_Member	GO Biological Processes	GO:0051251	positive regulation of lymphocyte activation	-9.19526	-7.0337	14/391	2534,3105,3109,3134,3146,3552,3553,3569,4773,6352,10148,10451,64127,64332	FYN,HLA-A,HLA-DMB,HLA-F,HMGB1,IL1A,IL1B,IL6,NFATC2,CCL5,EBI3,VAV3,NOD2,NFKBIZ
8_Member	GO Biological Processes	GO:0042129	regulation of T cell proliferation	-8.6203	-6.49415	10/175	384,3105,3109,3146,3552,3553,3569,5880,6352,10148	ARG2,HLA-A,HLA-DMB,HMGB1,IL1A,IL1B,IL6,RAC2,CCL5,EBI3
8_Member	GO Biological Processes	GO:0050870	positive regulation of T cell activation	-8.3683	-6.29388	11/243	2534,3105,3109,3146,3552,3553,3569,6352,10148,64127,64332	FYN,HLA-A,HLA-DMB,HMGB1,IL1A,IL1B,IL6,CCL5,EBI3,NOD2,NFKBIZ
8_Member	GO Biological Processes	GO:0042102	positive regulation of T cell proliferation	-8.00774	-5.97111	8/104	3105,3109,3146,3552,3553,3569,6352,10148	HLA-A,HLA-DMB,HMGB1,IL1A,IL1B,IL6,CCL5,EBI3
8_Member	GO Biological Processes	GO:0032649	regulation of interferon-gamma production	-7.60369	-5.61916	8/117	3105,3146,3553,3624,7098,9636,10148,64127	HLA-A,HMGB1,IL1B,INHBA,TLR3,ISG15,EBI3,NOD2
8_Member	GO Biological Processes	GO:0032729	positive regulation of interferon-gamma production	-4.82647	-3.19622	5/77	3105,3553,7098,9636,10148	HLA-A,IL1B,TLR3,ISG15,EBI3
9_Summary	GO Biological Processes	GO:0001934	positive regulation of protein phosphorylation	-17.7851	-14.9012	27/741	94,154,284,332,718,1437,1440,1956,2534,3077,3553,3569,3624,4803,5154,5228,5743,6352,7057,7098,7349,7448,8482,9518,9966,64127,133396,2243,2263,3146,3383,3552,3725,6348,6364,25759,57556,4922,10451,5021	ACVRL1,ADRB2,ANGPT1,BIRC5,C3,CSF2,CSF3,EGFR,FYN,HFE,IL1B,IL6,INHBA,NGF,PDGFA,PGF,PTGS2,CCL5,THBS1,TLR3,UCN,VTN,SEMA7A,GDF15,TNFSF15,NOD2,IL31RA,FGA,FGFR2,HMGB1,ICAM1,IL1A,JUN,CCL3,CCL20,SHC2,SEMA6A,NTS,VAV3,OXTR
9_Member	GO Biological Processes	GO:0001934	positive regulation of protein phosphorylation	-17.7851	-14.9012	27/741	94,154,284,332,718,1437,1440,1956,2534,3077,3553,3569,3624,4803,5154,5228,5743,6352,7057,7098,7349,7448,8482,9518,9966,64127,133396	ACVRL1,ADRB2,ANGPT1,BIRC5,C3,CSF2,CSF3,EGFR,FYN,HFE,IL1B,IL6,INHBA,NGF,PDGFA,PGF,PTGS2,CCL5,THBS1,TLR3,UCN,VTN,SEMA7A,GDF15,TNFSF15,NOD2,IL31RA
9_Member	GO Biological Processes	GO:0043410	positive regulation of MAPK cascade	-15.1553	-12.4525	21/492	154,284,1956,2243,2263,3146,3383,3552,3553,3569,3725,5154,6348,6352,6364,7057,7098,8482,9518,25759,64127	ADRB2,ANGPT1,EGFR,FGA,FGFR2,HMGB1,ICAM1,IL1A,IL1B,IL6,JUN,PDGFA,CCL3,CCL5,CCL20,THBS1,TLR3,SEMA7A,GDF15,SHC2,NOD2
9_Member	GO Biological Processes	GO:0043408	regulation of MAPK cascade	-13.3061	-10.7002	22/688	154,284,1956,2243,2263,3146,3383,3552,3553,3569,3725,5154,6348,6352,6364,7057,7098,8482,9518,25759,57556,64127	ADRB2,ANGPT1,EGFR,FGA,FGFR2,HMGB1,ICAM1,IL1A,IL1B,IL6,JUN,PDGFA,CCL3,CCL5,CCL20,THBS1,TLR3,SEMA7A,GDF15,SHC2,SEMA6A,NOD2
9_Member	GO Biological Processes	GO:0070372	regulation of ERK1 and ERK2 cascade	-12.8106	-10.2352	16/312	284,1956,2243,2263,3146,3383,3552,3553,3725,5154,6348,6352,6364,8482,57556,64127	ANGPT1,EGFR,FGA,FGFR2,HMGB1,ICAM1,IL1A,IL1B,JUN,PDGFA,CCL3,CCL5,CCL20,SEMA7A,SEMA6A,NOD2
9_Member	GO Biological Processes	GO:0070374	positive regulation of ERK1 and ERK2 cascade	-12.4988	-9.95872	14/221	284,1956,2243,2263,3146,3383,3552,3725,5154,6348,6352,6364,8482,64127	ANGPT1,EGFR,FGA,FGFR2,HMGB1,ICAM1,IL1A,JUN,PDGFA,CCL3,CCL5,CCL20,SEMA7A,NOD2
9_Member	GO Biological Processes	GO:0051897	positive regulation of protein kinase B signaling	-7.54587	-5.5651	8/119	284,1440,1956,4922,5154,6348,7057,9518	ANGPT1,CSF3,EGFR,NTS,PDGFA,CCL3,THBS1,GDF15
9_Member	GO Biological Processes	GO:0033674	positive regulation of kinase activity	-7.04565	-5.10764	13/489	154,284,1956,2263,3553,5154,6352,7057,7098,7349,9966,10451,64127	ADRB2,ANGPT1,EGFR,FGFR2,IL1B,PDGFA,CCL5,THBS1,TLR3,UCN,TNFSF15,VAV3,NOD2
9_Member	GO Biological Processes	GO:0051347	positive regulation of transferase activity	-6.2455	-4.41683	13/575	154,284,1956,2263,3553,5154,6352,7057,7098,7349,9966,10451,64127	ADRB2,ANGPT1,EGFR,FGFR2,IL1B,PDGFA,CCL5,THBS1,TLR3,UCN,TNFSF15,VAV3,NOD2
9_Member	GO Biological Processes	GO:0045860	positive regulation of protein kinase activity	-6.08177	-4.27834	11/409	154,284,1956,3553,5154,6352,7057,7098,7349,9966,64127	ADRB2,ANGPT1,EGFR,IL1B,PDGFA,CCL5,THBS1,TLR3,UCN,TNFSF15,NOD2
9_Member	GO Biological Processes	GO:0051896	regulation of protein kinase B signaling	-6.03524	-4.24154	8/187	284,1440,1956,4922,5154,6348,7057,9518	ANGPT1,CSF3,EGFR,NTS,PDGFA,CCL3,THBS1,GDF15
9_Member	GO Biological Processes	GO:0043549	regulation of kinase activity	-4.81838	-3.18896	13/778	154,284,1956,2263,3553,5154,6352,7057,7098,7349,9966,10451,64127	ADRB2,ANGPT1,EGFR,FGFR2,IL1B,PDGFA,CCL5,THBS1,TLR3,UCN,TNFSF15,VAV3,NOD2
9_Member	GO Biological Processes	GO:0045859	regulation of protein kinase activity	-4.13859	-2.59851	11/660	154,284,1956,3553,5154,6352,7057,7098,7349,9966,64127	ADRB2,ANGPT1,EGFR,IL1B,PDGFA,CCL5,THBS1,TLR3,UCN,TNFSF15,NOD2
9_Member	GO Biological Processes	GO:0014066	regulation of phosphatidylinositol 3-kinase signaling	-4.08014	-2.54613	5/110	284,1440,1956,5154,6352	ANGPT1,CSF3,EGFR,PDGFA,CCL5
9_Member	GO Biological Processes	GO:0043406	positive regulation of MAP kinase activity	-3.97101	-2.45148	5/116	1956,3553,5154,7057,64127	EGFR,IL1B,PDGFA,THBS1,NOD2
9_Member	GO Biological Processes	GO:0014068	positive regulation of phosphatidylinositol 3-kinase signaling	-3.53435	-2.07402	4/79	284,1440,5154,6352	ANGPT1,CSF3,PDGFA,CCL5
9_Member	GO Biological Processes	GO:0071902	positive regulation of protein serine/threonine kinase activity	-3.53094	-2.07174	6/224	154,1956,3553,5154,7057,64127	ADRB2,EGFR,IL1B,PDGFA,THBS1,NOD2
9_Member	GO Biological Processes	GO:0043405	regulation of MAP kinase activity	-3.05943	-1.66208	5/183	1956,3553,5154,7057,64127	EGFR,IL1B,PDGFA,THBS1,NOD2
9_Member	GO Biological Processes	GO:0071900	regulation of protein serine/threonine kinase activity	-2.31658	-1.00213	6/388	154,1956,3553,5154,7057,64127	ADRB2,EGFR,IL1B,PDGFA,THBS1,NOD2
9_Member	GO Cellular Components	GO:0005902	microvillus	-2.21604	-0.911179	3/92	284,5021,5154	ANGPT1,OXTR,PDGFA
10_Summary	GO Molecular Functions	GO:0042277	peptide binding	-16.2627	-13.4605	19/323	154,1394,3105,3106,3107,3134,3136,3624,3689,4035,4792,4804,5021,6752,7097,9340,10148,30061,64127	ADRB2,CRHR1,HLA-A,HLA-B,HLA-C,HLA-F,HLA-H,INHBA,ITGB2,LRP1,NFKBIA,NGFR,OXTR,SSTR2,TLR2,GLP2R,EBI3,SLC40A1,NOD2
10_Member	GO Molecular Functions	GO:0042277	peptide binding	-16.2627	-13.4605	19/323	154,1394,3105,3106,3107,3134,3136,3624,3689,4035,4792,4804,5021,6752,7097,9340,10148,30061,64127	ADRB2,CRHR1,HLA-A,HLA-B,HLA-C,HLA-F,HLA-H,INHBA,ITGB2,LRP1,NFKBIA,NGFR,OXTR,SSTR2,TLR2,GLP2R,EBI3,SLC40A1,NOD2
10_Member	GO Molecular Functions	GO:0033218	amide binding	-14.5021	-11.837	19/403	154,1394,3105,3106,3107,3134,3136,3624,3689,4035,4792,4804,5021,6752,7097,9340,10148,30061,64127	ADRB2,CRHR1,HLA-A,HLA-B,HLA-C,HLA-F,HLA-H,INHBA,ITGB2,LRP1,NFKBIA,NGFR,OXTR,SSTR2,TLR2,GLP2R,EBI3,SLC40A1,NOD2
11_Summary	GO Biological Processes	GO:0008285	negative regulation of cell population proliferation	-14.0804	-11.4417	24/786	94,350,384,2263,2919,3552,3553,3569,3576,3604,3624,3725,4803,4804,4880,5371,5743,6752,7049,7057,7097,7421,54567,163702	ACVRL1,APOH,ARG2,FGFR2,CXCL1,IL1A,IL1B,IL6,CXCL8,TNFRSF9,INHBA,JUN,NGF,NGFR,NPPC,PML,PTGS2,SSTR2,TGFBR3,THBS1,TLR2,VDR,DLL4,IFNLR1
11_Member	GO Biological Processes	GO:0008285	negative regulation of cell population proliferation	-14.0804	-11.4417	24/786	94,350,384,2263,2919,3552,3553,3569,3576,3604,3624,3725,4803,4804,4880,5371,5743,6752,7049,7057,7097,7421,54567,163702	ACVRL1,APOH,ARG2,FGFR2,CXCL1,IL1A,IL1B,IL6,CXCL8,TNFRSF9,INHBA,JUN,NGF,NGFR,NPPC,PML,PTGS2,SSTR2,TGFBR3,THBS1,TLR2,VDR,DLL4,IFNLR1
12_Summary	GO Biological Processes	GO:0071363	cellular response to growth factor stimulus	-13.3335	-10.7196	19/468	94,1956,2263,2534,3065,3077,3576,3725,4803,5154,5228,5371,6352,7049,7057,7791,9518,54567,57556,154,284,3624,4035,4880,25759,133396	ACVRL1,EGFR,FGFR2,FYN,HDAC1,HFE,CXCL8,JUN,NGF,PDGFA,PGF,PML,CCL5,TGFBR3,THBS1,ZYX,GDF15,DLL4,SEMA6A,ADRB2,ANGPT1,INHBA,LRP1,NPPC,SHC2,IL31RA
12_Member	GO Biological Processes	GO:0071363	cellular response to growth factor stimulus	-13.3335	-10.7196	19/468	94,1956,2263,2534,3065,3077,3576,3725,4803,5154,5228,5371,6352,7049,7057,7791,9518,54567,57556	ACVRL1,EGFR,FGFR2,FYN,HDAC1,HFE,CXCL8,JUN,NGF,PDGFA,PGF,PML,CCL5,TGFBR3,THBS1,ZYX,GDF15,DLL4,SEMA6A
12_Member	GO Biological Processes	GO:0070848	response to growth factor	-12.8533	-10.2705	19/498	94,1956,2263,2534,3065,3077,3576,3725,4803,5154,5228,5371,6352,7049,7057,7791,9518,54567,57556	ACVRL1,EGFR,FGFR2,FYN,HDAC1,HFE,CXCL8,JUN,NGF,PDGFA,PGF,PML,CCL5,TGFBR3,THBS1,ZYX,GDF15,DLL4,SEMA6A
12_Member	GO Biological Processes	GO:0007167	enzyme-linked receptor protein signaling pathway	-12.3555	-9.84177	20/606	94,154,284,1956,2263,2534,3077,3624,3725,4035,4803,4880,5154,5228,5371,7049,7791,9518,25759,133396	ACVRL1,ADRB2,ANGPT1,EGFR,FGFR2,FYN,HFE,INHBA,JUN,LRP1,NGF,NPPC,PDGFA,PGF,PML,TGFBR3,ZYX,GDF15,SHC2,IL31RA
12_Member	GO Biological Processes	GO:0007169	transmembrane receptor protein tyrosine kinase signaling pathway	-6.12348	-4.3163	11/405	154,284,1956,2263,2534,4803,5154,5228,9518,25759,133396	ADRB2,ANGPT1,EGFR,FGFR2,FYN,NGF,PDGFA,PGF,GDF15,SHC2,IL31RA
13_Summary	GO Biological Processes	GO:0036293	response to decreased oxygen levels	-12.0846	-9.60163	15/290	94,3552,4880,5021,5154,5228,5328,5371,5743,6095,6781,7049,7057,7097,8614,284,1890,1907,2263,3576,3725,4035,10451,54567,79924,4804,1956,7421,2695,3553,3624,4773,7098	ACVRL1,IL1A,NPPC,OXTR,PDGFA,PGF,PLAU,PML,PTGS2,RORA,STC1,TGFBR3,THBS1,TLR2,STC2,ANGPT1,TYMP,EDN2,FGFR2,CXCL8,JUN,LRP1,VAV3,DLL4,ADM2,NGFR,EGFR,VDR,GIP,IL1B,INHBA,NFATC2,TLR3
13_Member	GO Biological Processes	GO:0036293	response to decreased oxygen levels	-12.0846	-9.60163	15/290	94,3552,4880,5021,5154,5228,5328,5371,5743,6095,6781,7049,7057,7097,8614	ACVRL1,IL1A,NPPC,OXTR,PDGFA,PGF,PLAU,PML,PTGS2,RORA,STC1,TGFBR3,THBS1,TLR2,STC2
13_Member	GO Biological Processes	GO:0048514	blood vessel morphogenesis	-11.9171	-9.46291	17/421	94,284,1890,1907,2263,3576,3725,4035,5154,5228,5743,6095,7049,7057,10451,54567,79924	ACVRL1,ANGPT1,TYMP,EDN2,FGFR2,CXCL8,JUN,LRP1,PDGFA,PGF,PTGS2,RORA,TGFBR3,THBS1,VAV3,DLL4,ADM2
13_Member	GO Biological Processes	GO:0001568	blood vessel development	-11.6938	-9.2452	18/505	94,284,1890,1907,2263,3576,3725,4035,4804,5154,5228,5743,6095,7049,7057,10451,54567,79924	ACVRL1,ANGPT1,TYMP,EDN2,FGFR2,CXCL8,JUN,LRP1,NGFR,PDGFA,PGF,PTGS2,RORA,TGFBR3,THBS1,VAV3,DLL4,ADM2
13_Member	GO Biological Processes	GO:0035239	tube morphogenesis	-11.6429	-9.2105	20/663	94,284,1890,1907,1956,2263,3576,3725,4035,5154,5228,5371,5743,6095,7049,7057,7421,10451,54567,79924	ACVRL1,ANGPT1,TYMP,EDN2,EGFR,FGFR2,CXCL8,JUN,LRP1,PDGFA,PGF,PML,PTGS2,RORA,TGFBR3,THBS1,VDR,VAV3,DLL4,ADM2
13_Member	GO Biological Processes	GO:0070482	response to oxygen levels	-11.5493	-9.12731	15/316	94,3552,4880,5021,5154,5228,5328,5371,5743,6095,6781,7049,7057,7097,8614	ACVRL1,IL1A,NPPC,OXTR,PDGFA,PGF,PLAU,PML,PTGS2,RORA,STC1,TGFBR3,THBS1,TLR2,STC2
13_Member	GO Biological Processes	GO:0001525	angiogenesis	-11.4134	-8.99657	15/323	94,284,1890,1907,2263,3576,3725,5154,5228,5743,6095,7057,10451,54567,79924	ACVRL1,ANGPT1,TYMP,EDN2,FGFR2,CXCL8,JUN,PDGFA,PGF,PTGS2,RORA,THBS1,VAV3,DLL4,ADM2
13_Member	GO Biological Processes	GO:0001944	vasculature development	-11.3998	-8.98805	18/526	94,284,1890,1907,2263,3576,3725,4035,4804,5154,5228,5743,6095,7049,7057,10451,54567,79924	ACVRL1,ANGPT1,TYMP,EDN2,FGFR2,CXCL8,JUN,LRP1,NGFR,PDGFA,PGF,PTGS2,RORA,TGFBR3,THBS1,VAV3,DLL4,ADM2
13_Member	GO Biological Processes	GO:0001666	response to hypoxia	-11.1689	-8.78172	14/277	94,3552,4880,5154,5228,5328,5371,5743,6095,6781,7049,7057,7097,8614	ACVRL1,IL1A,NPPC,PDGFA,PGF,PLAU,PML,PTGS2,RORA,STC1,TGFBR3,THBS1,TLR2,STC2
13_Member	GO Biological Processes	GO:0009410	response to xenobiotic stimulus	-9.05361	-6.89769	14/401	2695,3553,3624,3725,4773,4880,5021,5154,5228,5743,6095,7057,7098,10451	GIP,IL1B,INHBA,JUN,NFATC2,NPPC,OXTR,PDGFA,PGF,PTGS2,RORA,THBS1,TLR3,VAV3
14_Summary	GO Biological Processes	GO:0006959	humoral immune response	-12.063	-9.58599	15/291	718,727,1672,2243,2919,2920,2921,3105,3569,3576,3627,5266,6280,6590,10148	C3,C5,DEFB1,FGA,CXCL1,CXCL2,CXCL3,HLA-A,IL6,CXCL8,CXCL10,PI3,S100A9,SLPI,EBI3
14_Member	GO Biological Processes	GO:0006959	humoral immune response	-12.063	-9.58599	15/291	718,727,1672,2243,2919,2920,2921,3105,3569,3576,3627,5266,6280,6590,10148	C3,C5,DEFB1,FGA,CXCL1,CXCL2,CXCL3,HLA-A,IL6,CXCL8,CXCL10,PI3,S100A9,SLPI,EBI3
14_Member	GO Biological Processes	GO:0019730	antimicrobial humoral response	-11.9985	-9.53688	11/112	1672,2243,2919,2920,2921,3105,3576,3627,5266,6280,6590	DEFB1,FGA,CXCL1,CXCL2,CXCL3,HLA-A,CXCL8,CXCL10,PI3,S100A9,SLPI
14_Member	GO Biological Processes	GO:0019731	antibacterial humoral response	-5.55026	-3.81996	5/55	1672,2243,3105,5266,6590	DEFB1,FGA,HLA-A,PI3,SLPI
15_Summary	GO Biological Processes	GO:0030162	regulation of proteolysis	-11.6601	-9.21693	21/745	332,718,727,2534,3065,3077,3146,3553,4035,4803,4804,5266,5328,5371,5743,6280,6590,7057,7448,9966,10062,5806,7349	BIRC5,C3,C5,FYN,HDAC1,HFE,HMGB1,IL1B,LRP1,NGF,NGFR,PI3,PLAU,PML,PTGS2,S100A9,SLPI,THBS1,VTN,TNFSF15,NR1H3,PTX3,UCN
15_Member	GO Biological Processes	GO:0030162	regulation of proteolysis	-11.6601	-9.21693	21/745	332,718,727,2534,3065,3077,3146,3553,4035,4803,4804,5266,5328,5371,5743,6280,6590,7057,7448,9966,10062	BIRC5,C3,C5,FYN,HDAC1,HFE,HMGB1,IL1B,LRP1,NGF,NGFR,PI3,PLAU,PML,PTGS2,S100A9,SLPI,THBS1,VTN,TNFSF15,NR1H3
15_Member	GO Biological Processes	GO:0052547	regulation of peptidase activity	-11.3664	-8.95966	17/456	332,718,727,2534,3065,3146,4035,4803,4804,5266,5371,5743,6280,6590,7057,7448,9966	BIRC5,C3,C5,FYN,HDAC1,HMGB1,LRP1,NGF,NGFR,PI3,PML,PTGS2,S100A9,SLPI,THBS1,VTN,TNFSF15
15_Member	GO Biological Processes	GO:0052548	regulation of endopeptidase activity	-10.7639	-8.43886	16/426	332,718,727,2534,3065,3146,4803,4804,5266,5371,5743,6280,6590,7057,7448,9966	BIRC5,C3,C5,FYN,HDAC1,HMGB1,NGF,NGFR,PI3,PML,PTGS2,S100A9,SLPI,THBS1,VTN,TNFSF15
15_Member	GO Biological Processes	GO:0045861	negative regulation of proteolysis	-9.78918	-7.57003	14/352	332,718,727,3077,4035,4803,5266,5328,5371,5743,6590,7057,7448,10062	BIRC5,C3,C5,HFE,LRP1,NGF,PI3,PLAU,PML,PTGS2,SLPI,THBS1,VTN,NR1H3
15_Member	GO Biological Processes	GO:0010466	negative regulation of peptidase activity	-6.95595	-5.03457	10/262	332,718,727,4035,4803,5266,5743,6590,7057,7448	BIRC5,C3,C5,LRP1,NGF,PI3,PTGS2,SLPI,THBS1,VTN
15_Member	GO Biological Processes	GO:0051346	negative regulation of hydrolase activity	-6.49839	-4.63501	11/371	332,718,727,4035,4803,5266,5743,5806,6590,7057,7448	BIRC5,C3,C5,LRP1,NGF,PI3,PTGS2,PTX3,SLPI,THBS1,VTN
15_Member	GO Biological Processes	GO:0010951	negative regulation of endopeptidase activity	-6.08355	-4.27887	9/251	332,718,727,4803,5266,5743,6590,7057,7448	BIRC5,C3,C5,NGF,PI3,PTGS2,SLPI,THBS1,VTN
15_Member	GO Biological Processes	GO:0043086	negative regulation of catalytic activity	-4.10781	-2.57044	12/786	332,718,727,3553,4035,4803,5266,5743,5806,6590,7057,7448	BIRC5,C3,C5,IL1B,LRP1,NGF,PI3,PTGS2,PTX3,SLPI,THBS1,VTN
15_Member	GO Molecular Functions	GO:0004866	endopeptidase inhibitor activity	-4.04609	-2.51806	6/180	332,718,727,4803,5266,6590	BIRC5,C3,C5,NGF,PI3,SLPI
15_Member	GO Molecular Functions	GO:0030414	peptidase inhibitor activity	-3.95516	-2.43627	6/187	332,718,727,4803,5266,6590	BIRC5,C3,C5,NGF,PI3,SLPI
15_Member	GO Molecular Functions	GO:0061135	endopeptidase regulator activity	-3.86797	-2.36551	6/194	332,718,727,4803,5266,6590	BIRC5,C3,C5,NGF,PI3,SLPI
15_Member	GO Molecular Functions	GO:0061134	peptidase regulator activity	-3.46973	-2.01834	6/230	332,718,727,4803,5266,6590	BIRC5,C3,C5,NGF,PI3,SLPI
15_Member	GO Molecular Functions	GO:0004857	enzyme inhibitor activity	-2.99281	-1.60368	7/390	332,718,727,4803,5266,6590,7349	BIRC5,C3,C5,NGF,PI3,SLPI,UCN
16_Summary	GO Cellular Components	GO:0031983	vesicle lumen	-11.3372	-8.93544	15/327	350,718,1956,2243,2695,2919,3146,3934,5004,5154,5806,6280,6590,7057,10447,3689,4973,5328,5724	APOH,C3,EGFR,FGA,GIP,CXCL1,HMGB1,LCN2,ORM1,PDGFA,PTX3,S100A9,SLPI,THBS1,FAM3C,ITGB2,OLR1,PLAU,PTAFR
16_Member	GO Cellular Components	GO:0031983	vesicle lumen	-11.3372	-8.93544	15/327	350,718,1956,2243,2695,2919,3146,3934,5004,5154,5806,6280,6590,7057,10447	APOH,C3,EGFR,FGA,GIP,CXCL1,HMGB1,LCN2,ORM1,PDGFA,PTX3,S100A9,SLPI,THBS1,FAM3C
16_Member	GO Cellular Components	GO:0034774	secretory granule lumen	-10.2982	-8.02921	14/322	350,718,2243,2695,2919,3146,3934,5004,5154,5806,6280,6590,7057,10447	APOH,C3,FGA,GIP,CXCL1,HMGB1,LCN2,ORM1,PDGFA,PTX3,S100A9,SLPI,THBS1,FAM3C
16_Member	GO Cellular Components	GO:0060205	cytoplasmic vesicle lumen	-10.2449	-7.99258	14/325	350,718,2243,2695,2919,3146,3934,5004,5154,5806,6280,6590,7057,10447	APOH,C3,FGA,GIP,CXCL1,HMGB1,LCN2,ORM1,PDGFA,PTX3,S100A9,SLPI,THBS1,FAM3C
16_Member	GO Cellular Components	GO:0042581	specific granule	-6.54933	-4.6802	8/160	2919,3689,3934,4973,5004,5328,5806,6590	CXCL1,ITGB2,LCN2,OLR1,ORM1,PLAU,PTX3,SLPI
16_Member	GO Cellular Components	GO:0070820	tertiary granule	-5.3369	-3.63212	7/164	2919,3689,4973,5004,5328,5724,5806	CXCL1,ITGB2,OLR1,ORM1,PLAU,PTAFR,PTX3
16_Member	GO Cellular Components	GO:0035580	specific granule lumen	-5.29043	-3.59642	5/62	2919,3934,5004,5806,6590	CXCL1,LCN2,ORM1,PTX3,SLPI
16_Member	GO Cellular Components	GO:1904724	tertiary granule lumen	-2.84949	-1.47729	3/55	2919,5004,5806	CXCL1,ORM1,PTX3
17_Summary	GO Biological Processes	GO:0051046	regulation of secretion	-11.3098	-8.91291	19/610	1394,2243,2695,3077,3134,3552,3553,3569,3624,3689,5021,5724,5880,6352,6781,7097,7349,10062,91543,284,2534,5743,1956,4035,4804,7425,8614	CRHR1,FGA,GIP,HFE,HLA-F,IL1A,IL1B,IL6,INHBA,ITGB2,OXTR,PTAFR,RAC2,CCL5,STC1,TLR2,UCN,NR1H3,RSAD2,ANGPT1,FYN,PTGS2,EGFR,LRP1,NGFR,VGF,STC2
17_Member	GO Biological Processes	GO:0051046	regulation of secretion	-11.3098	-8.91291	19/610	1394,2243,2695,3077,3134,3552,3553,3569,3624,3689,5021,5724,5880,6352,6781,7097,7349,10062,91543	CRHR1,FGA,GIP,HFE,HLA-F,IL1A,IL1B,IL6,INHBA,ITGB2,OXTR,PTAFR,RAC2,CCL5,STC1,TLR2,UCN,NR1H3,RSAD2
17_Member	GO Biological Processes	GO:1903530	regulation of secretion by cell	-11.0277	-8.65915	18/554	1394,2243,2695,3077,3134,3552,3553,3569,3624,3689,5021,5724,5880,6352,7097,7349,10062,91543	CRHR1,FGA,GIP,HFE,HLA-F,IL1A,IL1B,IL6,INHBA,ITGB2,OXTR,PTAFR,RAC2,CCL5,TLR2,UCN,NR1H3,RSAD2
17_Member	GO Biological Processes	GO:1903532	positive regulation of secretion by cell	-8.88819	-6.74606	12/276	2243,2695,3077,3134,3552,3553,3624,3689,5021,5724,7097,7349	FGA,GIP,HFE,HLA-F,IL1A,IL1B,INHBA,ITGB2,OXTR,PTAFR,TLR2,UCN
17_Member	GO Biological Processes	GO:0051047	positive regulation of secretion	-8.43153	-6.3357	12/303	2243,2695,3077,3134,3552,3553,3624,3689,5021,5724,7097,7349	FGA,GIP,HFE,HLA-F,IL1A,IL1B,INHBA,ITGB2,OXTR,PTAFR,TLR2,UCN
17_Member	GO Biological Processes	GO:0051223	regulation of protein transport	-7.89022	-5.87234	14/495	284,2243,2534,2695,3552,3553,3569,3689,5743,5880,6352,7097,10062,91543	ANGPT1,FGA,FYN,GIP,IL1A,IL1B,IL6,ITGB2,PTGS2,RAC2,CCL5,TLR2,NR1H3,RSAD2
17_Member	GO Biological Processes	GO:0070201	regulation of establishment of protein localization	-7.62297	-5.63655	14/520	284,2243,2534,2695,3552,3553,3569,3689,5743,5880,6352,7097,10062,91543	ANGPT1,FGA,FYN,GIP,IL1A,IL1B,IL6,ITGB2,PTGS2,RAC2,CCL5,TLR2,NR1H3,RSAD2
17_Member	GO Biological Processes	GO:1903829	positive regulation of protein localization	-6.57316	-4.69672	12/448	1956,2243,2534,2695,3552,3553,3689,4035,4804,5743,5880,7097	EGFR,FGA,FYN,GIP,IL1A,IL1B,ITGB2,LRP1,NGFR,PTGS2,RAC2,TLR2
17_Member	GO Biological Processes	GO:0046883	regulation of hormone secretion	-6.36889	-4.52369	9/232	1394,2243,2695,3077,3553,3569,3624,6352,7349	CRHR1,FGA,GIP,HFE,IL1B,IL6,INHBA,CCL5,UCN
17_Member	GO Biological Processes	GO:0050708	regulation of protein secretion	-6.0692	-4.26949	9/252	2243,2695,3552,3553,3569,6352,7097,10062,91543	FGA,GIP,IL1A,IL1B,IL6,CCL5,TLR2,NR1H3,RSAD2
17_Member	GO Biological Processes	GO:0051222	positive regulation of protein transport	-5.53058	-3.80446	9/293	2243,2534,2695,3552,3553,3689,5743,5880,7097	FGA,FYN,GIP,IL1A,IL1B,ITGB2,PTGS2,RAC2,TLR2
17_Member	GO Biological Processes	GO:1904951	positive regulation of establishment of protein localization	-5.34314	-3.63737	9/309	2243,2534,2695,3552,3553,3689,5743,5880,7097	FGA,FYN,GIP,IL1A,IL1B,ITGB2,PTGS2,RAC2,TLR2
17_Member	GO Biological Processes	GO:0010817	regulation of hormone levels	-5.26016	-3.57	11/498	1394,2243,2695,3077,3553,3569,3624,6352,7349,7425,8614	CRHR1,FGA,GIP,HFE,IL1B,IL6,INHBA,CCL5,UCN,VGF,STC2
17_Member	GO Biological Processes	GO:0090276	regulation of peptide hormone secretion	-5.11941	-3.45076	7/177	2243,2695,3077,3553,3569,6352,7349	FGA,GIP,HFE,IL1B,IL6,CCL5,UCN
17_Member	GO Biological Processes	GO:0002791	regulation of peptide secretion	-5.07172	-3.41031	7/180	2243,2695,3077,3553,3569,6352,7349	FGA,GIP,HFE,IL1B,IL6,CCL5,UCN
17_Member	GO Biological Processes	GO:0090087	regulation of peptide transport	-5.02492	-3.37151	7/183	2243,2695,3077,3553,3569,6352,7349	FGA,GIP,HFE,IL1B,IL6,CCL5,UCN
17_Member	GO Biological Processes	GO:0046887	positive regulation of hormone secretion	-3.86791	-2.36551	5/122	2243,2695,3077,3624,7349	FGA,GIP,HFE,INHBA,UCN
17_Member	GO Biological Processes	GO:0090277	positive regulation of peptide hormone secretion	-3.30026	-1.87204	4/91	2243,2695,3077,7349	FGA,GIP,HFE,UCN
17_Member	GO Biological Processes	GO:0002793	positive regulation of peptide secretion	-3.26454	-1.84205	4/93	2243,2695,3077,7349	FGA,GIP,HFE,UCN
17_Member	GO Biological Processes	GO:0050714	positive regulation of protein secretion	-2.74845	-1.38718	4/128	2243,2695,3552,7097	FGA,GIP,IL1A,TLR2
17_Member	GO Biological Processes	GO:0050796	regulation of insulin secretion	-2.53059	-1.19506	4/147	2695,3553,3569,6352	GIP,IL1B,IL6,CCL5
18_Summary	GO Cellular Components	GO:0098797	plasma membrane protein complex	-11.0949	-8.72173	20/711	94,727,1437,1956,3077,3105,3106,3107,3109,3134,3136,3146,3569,3689,4035,5880,7049,7097,7448,163702,154,2263,4973,7421,10062,10148,133396	ACVRL1,C5,CSF2,EGFR,HFE,HLA-A,HLA-B,HLA-C,HLA-DMB,HLA-F,HLA-H,HMGB1,IL6,ITGB2,LRP1,RAC2,TGFBR3,TLR2,VTN,IFNLR1,ADRB2,FGFR2,OLR1,VDR,NR1H3,EBI3,IL31RA
18_Member	GO Cellular Components	GO:0098797	plasma membrane protein complex	-11.0949	-8.72173	20/711	94,727,1437,1956,3077,3105,3106,3107,3109,3134,3136,3146,3569,3689,4035,5880,7049,7097,7448,163702	ACVRL1,C5,CSF2,EGFR,HFE,HLA-A,HLA-B,HLA-C,HLA-DMB,HLA-F,HLA-H,HMGB1,IL6,ITGB2,LRP1,RAC2,TGFBR3,TLR2,VTN,IFNLR1
18_Member	GO Cellular Components	GO:0043235	receptor complex	-10.168	-7.92555	17/544	94,154,1437,1956,2263,3077,3569,3689,4035,4973,7049,7097,7421,10062,10148,133396,163702	ACVRL1,ADRB2,CSF2,EGFR,FGFR2,HFE,IL6,ITGB2,LRP1,OLR1,TGFBR3,TLR2,VDR,NR1H3,EBI3,IL31RA,IFNLR1
18_Member	GO Cellular Components	GO:0098802	plasma membrane signaling receptor complex	-3.49984	-2.04568	7/320	94,1437,3077,3569,3689,7097,163702	ACVRL1,CSF2,HFE,IL6,ITGB2,TLR2,IFNLR1
19_Summary	GO Biological Processes	GO:0002274	myeloid leukocyte activation	-10.9965	-8.63698	11/138	1437,1907,3146,3576,3689,3725,5971,6348,6352,7097,7098,3553,4035,4792,9641,3556,64135,5021	CSF2,EDN2,HMGB1,CXCL8,ITGB2,JUN,RELB,CCL3,CCL5,TLR2,TLR3,IL1B,LRP1,NFKBIA,IKBKE,IL1RAP,IFIH1,OXTR
19_Member	GO Biological Processes	GO:0002274	myeloid leukocyte activation	-10.9965	-8.63698	11/138	1437,1907,3146,3576,3689,3725,5971,6348,6352,7097,7098	CSF2,EDN2,HMGB1,CXCL8,ITGB2,JUN,RELB,CCL3,CCL5,TLR2,TLR3
19_Member	GO Biological Processes	GO:0061900	glial cell activation	-8.19065	-6.13274	6/36	3553,3689,3725,4035,7097,7098	IL1B,ITGB2,JUN,LRP1,TLR2,TLR3
19_Member	GO Biological Processes	GO:0150076	neuroinflammatory response	-7.97088	-5.93638	6/39	3553,3689,3725,4035,7097,7098	IL1B,ITGB2,JUN,LRP1,TLR2,TLR3
19_Member	GO Biological Processes	GO:0042116	macrophage activation	-6.99709	-5.06414	6/56	1437,1907,3689,3725,7097,7098	CSF2,EDN2,ITGB2,JUN,TLR2,TLR3
19_Member	GO Biological Processes	GO:0007249	I-kappaB kinase/NF-kappaB signaling	-5.55026	-3.81996	5/55	4792,5971,7097,7098,9641	NFKBIA,RELB,TLR2,TLR3,IKBKE
19_Member	GO Biological Processes	GO:0001774	microglial cell activation	-5.20761	-3.52788	4/30	3689,3725,7097,7098	ITGB2,JUN,TLR2,TLR3
19_Member	GO Biological Processes	GO:0002269	leukocyte activation involved in inflammatory response	-5.03754	-3.38148	4/33	3689,3725,7097,7098	ITGB2,JUN,TLR2,TLR3
19_Member	GO Biological Processes	GO:0007252	I-kappaB phosphorylation	-4.87142	-3.23444	3/12	7097,7098,9641	TLR2,TLR3,IKBKE
19_Member	GO Molecular Functions	GO:0003953	NAD+ nucleosidase activity	-3.71884	-2.23172	3/28	3556,7097,7098	IL1RAP,TLR2,TLR3
19_Member	GO Molecular Functions	GO:0016799	hydrolase activity, hydrolyzing N-glycosyl compounds	-2.9698	-1.58544	3/50	3556,7097,7098	IL1RAP,TLR2,TLR3
19_Member	GO Biological Processes	GO:0002224	toll-like receptor signaling pathway	-2.78282	-1.41793	3/58	4792,7097,7098	NFKBIA,TLR2,TLR3
19_Member	GO Biological Processes	GO:0060760	positive regulation of response to cytokine stimulus	-2.64071	-1.29576	3/65	7097,9641,64135	TLR2,IKBKE,IFIH1
19_Member	GO Biological Processes	GO:0051963	regulation of synapse assembly	-2.08114	-0.785269	3/103	3556,5021,7097	IL1RAP,OXTR,TLR2
20_Summary	GO Biological Processes	GO:0045765	regulation of angiogenesis	-10.971	-8.62039	15/347	94,350,718,727,3552,3553,3569,3576,3627,5228,5371,7057,7098,57556,79924	ACVRL1,APOH,C3,C5,IL1A,IL1B,IL6,CXCL8,CXCL10,PGF,PML,THBS1,TLR3,SEMA6A,ADM2
20_Member	GO Biological Processes	GO:0045765	regulation of angiogenesis	-10.971	-8.62039	15/347	94,350,718,727,3552,3553,3569,3576,3627,5228,5371,7057,7098,57556,79924	ACVRL1,APOH,C3,C5,IL1A,IL1B,IL6,CXCL8,CXCL10,PGF,PML,THBS1,TLR3,SEMA6A,ADM2
20_Member	GO Biological Processes	GO:1901342	regulation of vasculature development	-10.8657	-8.52374	15/353	94,350,718,727,3552,3553,3569,3576,3627,5228,5371,7057,7098,57556,79924	ACVRL1,APOH,C3,C5,IL1A,IL1B,IL6,CXCL8,CXCL10,PGF,PML,THBS1,TLR3,SEMA6A,ADM2
20_Member	GO Biological Processes	GO:0045766	positive regulation of angiogenesis	-8.40992	-6.31894	10/184	94,718,727,3552,3553,3576,5228,7057,7098,79924	ACVRL1,C3,C5,IL1A,IL1B,CXCL8,PGF,THBS1,TLR3,ADM2
20_Member	GO Biological Processes	GO:1904018	positive regulation of vasculature development	-8.40992	-6.31894	10/184	94,718,727,3552,3553,3576,5228,7057,7098,79924	ACVRL1,C3,C5,IL1A,IL1B,CXCL8,PGF,THBS1,TLR3,ADM2
