# Supplementary material for: Enabling factor for cancer hallmark acquisition: Small nucleolar RNA host gene 17
Source: Frontiers journal article supplement (doi:10.3389/fonc.2022.974939), 2022-09-14
Supplement: Data_Sheet_3.zip [file ߽ϸ__2022-06-12_17_48_36.xlsx]

## Sheet: Sheet 1
变量	细胞	相关系数(Pearson)	P值(Pearson)	相关系数(Spearman)	P值(Spearman)
SNHG17	aDC	-0.168	<0.001	-0.156	<0.001
SNHG17	B cells	-0.069	0.111	-0.068	0.114
SNHG17	CD8 T cells	-0.005	0.917	-0.007	0.873
SNHG17	Cytotoxic cells	-0.082	0.058	-0.074	0.089
SNHG17	DC	-0.375	<0.001	-0.370	<0.001
SNHG17	Eosinophils	-0.336	<0.001	-0.369	<0.001
SNHG17	iDC	-0.365	<0.001	-0.382	<0.001
SNHG17	Macrophages	-0.407	<0.001	-0.407	<0.001
SNHG17	Mast cells	-0.389	<0.001	-0.399	<0.001
SNHG17	Neutrophils	-0.303	<0.001	-0.317	<0.001
SNHG17	NK CD56bright cells	0.085	0.048	0.086	0.048
SNHG17	NK CD56dim cells	-0.023	0.597	-0.019	0.666
SNHG17	NK cells	-0.111	0.010	-0.143	<0.001
SNHG17	pDC	-0.136	0.002	-0.130	0.003
SNHG17	T cells	-0.185	<0.001	-0.177	<0.001
SNHG17	T helper cells	-0.150	<0.001	-0.116	0.007
SNHG17	Tcm	-0.149	<0.001	-0.169	<0.001
SNHG17	Tem	-0.123	0.004	-0.111	0.010
SNHG17	TFH	-0.105	0.015	-0.101	0.020
SNHG17	Tgd	0.032	0.464	0.021	0.630
SNHG17	Th1 cells	-0.237	<0.001	-0.230	<0.001
SNHG17	Th17 cells	-0.086	0.047	-0.070	0.106
SNHG17	Th2 cells	0.152	<0.001	0.153	<0.001
SNHG17	TReg	-0.048	0.270	-0.088	0.041
