# Supplementary material for: Enabling factor for cancer hallmark acquisition: Small nucleolar RNA host gene 17
Source: Frontiers journal article supplement (doi:10.3389/fonc.2022.974939), 2022-09-14
Supplement: Data_Sheet_3.zip [file ߽ϸ_ԭʼ_2022-06-12_17_47_51.xlsx]

## Sheet: Sheet 1
变量	细胞	相关系数(Pearson)	P值(Pearson)	相关系数(Spearman)	P值(Spearman)
SNHG17	aDC	-0.168209	9.25005e-05	-0.155945	0.000298443
SNHG17	B cells	-0.06903	0.110749	-0.068366	0.114211
SNHG17	CD8 T cells	-0.00451483	0.917023	-0.00694783	0.87258
SNHG17	Cytotoxic cells	-0.0819489	0.0581936	-0.0735698	0.0891279
SNHG17	DC	-0.375075	2.57952e-19	-0.369771	0
SNHG17	Eosinophils	-0.336082	1.36088e-15	-0.368513	0
SNHG17	iDC	-0.365398	2.41951e-18	-0.382217	0
SNHG17	Macrophages	-0.407375	8.34614e-23	-0.40682	0
SNHG17	Mast cells	-0.389072	8.83959e-21	-0.398586	0
SNHG17	Neutrophils	-0.303465	7.35959e-13	-0.317022	7.91597e-14
SNHG17	NK CD56bright cells	0.0854141	0.0483109	0.0856339	0.0477582
SNHG17	NK CD56dim cells	-0.0229184	0.596852	-0.0187062	0.66586
SNHG17	NK cells	-0.110807	0.0103209	-0.143242	0.000901499
SNHG17	pDC	-0.136087	0.00160486	-0.130089	0.00257185
SNHG17	T cells	-0.185029	1.655e-05	-0.176644	4.0925e-05
SNHG17	T helper cells	-0.149538	0.000519935	-0.116155	0.00718384
SNHG17	Tcm	-0.14943	0.000524852	-0.16889	8.85201e-05
SNHG17	Tem	-0.12271	0.00447764	-0.110762	0.0103836
SNHG17	TFH	-0.105004	0.015108	-0.100928	0.0195789
SNHG17	Tgd	0.0317034	0.464308	0.0208469	0.63033
SNHG17	Th1 cells	-0.237497	2.69447e-08	-0.229765	8.38375e-08
SNHG17	Th17 cells	-0.085821	0.0472487	-0.0700034	0.105782
SNHG17	Th2 cells	0.152107	0.000414637	0.152926	0.000391132
SNHG17	TReg	-0.0477741	0.269999	-0.0882421	0.041325
