# Supplementary material for: Enabling factor for cancer hallmark acquisition: Small nucleolar RNA host gene 17
Source: Frontiers journal article supplement (doi:10.3389/fonc.2022.974939), 2022-09-14
Supplement: Data_Sheet_4.zip [file __2022-06-12_22_35_32.xlsx]

## Sheet: Sheet 1
变量	细胞	相关系数(Pearson)	P值(Pearson)	相关系数(Spearman)	P值(Spearman)
SNHG17	StromalScore	-0.340	<0.001	-0.333	<0.001
SNHG17	ImmuneScore	-0.255	<0.001	-0.244	<0.001
SNHG17	ESTIMATEScore	-0.318	<0.001	-0.313	<0.001
