# Supplementary material for: Enabling factor for cancer hallmark acquisition: Small nucleolar RNA host gene 17
Source: Frontiers journal article supplement (doi:10.3389/fonc.2022.974939), 2022-09-14
Supplement: Data_Sheet_4.zip [file _ԭʼ_2022-06-12_22_34_41 (1).xlsx]

## Sheet: Sheet 1
变量	细胞	相关系数(Pearson)	P值(Pearson)	相关系数(Spearman)	P值(Spearman)
SNHG17	StromalScore	-0.339565	6.63676e-16	-0.332919	3.43611e-15
SNHG17	ImmuneScore	-0.255195	2.12046e-09	-0.243763	1.25029e-08
SNHG17	ESTIMATEScore	-0.318378	4.55521e-14	-0.312655	1.795e-13
