# Supplementary material for: Enabling factor for cancer hallmark acquisition: Small nucleolar RNA host gene 17
Source: Frontiers journal article supplement (doi:10.3389/fonc.2022.974939), 2022-09-14
Supplement: Data_Sheet_5.zip [file SNHG17 AND PD-L1(2).xlsx]

## Sheet: Table 0
组别	数目	最小值	最大值	中位数(Median)	四分位距(IQR)	均值(Mean)	标准差(SD)	标准误(SE)
SNHG17	535	0.928	4.505	2.428	0.912	2.499	0.674	0.029
PD-L1	535	0.273	5.864	1.759	1.337	1.957	1.065	0.046
正态性检验(Shapiro-Wilk normality test)
组别	统计量	p值
SNHG17	0.985	0
PD-L1	0.934	0
相关系数表
方法	组别I	组别J	相关系数(r)	置信区间(95%CI)	相关系数的平方(R^2)	p值
Pearson	SNHG17	PD-L1	-0.112	-0.195--0.027	-0.013	0.01
Spearman	SNHG17	PD-L1	-0.124		-0.015	0.004
