# Supplementary material for: Enabling factor for cancer hallmark acquisition: Small nucleolar RNA host gene 17
Source: Frontiers journal article supplement (doi:10.3389/fonc.2022.974939), 2022-09-14
Supplement: Data_Sheet_5.zip [file SNHG17 AND PD-L1.xlsx]

## Sheet: Sheet 1
sample_id	SNHG17	PD-L1
TCGA-05-4244-01A-01R-1107-07	3.34959	3.0725
TCGA-05-4249-01A-01R-1107-07	2.29801	1.59021
TCGA-05-4250-01A-01R-1107-07	2.20582	3.68257
TCGA-05-4382-01A-01R-1206-07	2.2755	2.36604
TCGA-05-4384-01A-01R-1755-07	1.98182	1.1677
TCGA-05-4389-01A-01R-1206-07	2.16535	2.15626
TCGA-05-4390-01A-02R-1755-07	3.29169	1.28668
TCGA-05-4395-01A-01R-1206-07	2.6532	1.40862
TCGA-05-4396-01A-21R-1858-07	1.97964	0.789547
TCGA-05-4397-01A-01R-1206-07	2.44654	1.17817
TCGA-05-4398-01A-01R-1206-07	2.46948	4.29421
TCGA-05-4402-01A-01R-1206-07	1.52757	1.37603
TCGA-05-4403-01A-01R-1206-07	1.17906	1.29129
TCGA-05-4405-01A-21R-1858-07	2.79282	2.02043
TCGA-05-4410-01A-21R-1858-07	1.99584	2.24154
TCGA-05-4415-01A-22R-1858-07	1.43656	1.48794
TCGA-05-4417-01A-22R-1858-07	2.90563	1.82066
TCGA-05-4418-01A-01R-1206-07	2.07239	2.1928
TCGA-05-4420-01A-01R-1206-07	3.81203	0.568945
TCGA-05-4422-01A-01R-1206-07	1.90057	1.50936
TCGA-05-4424-01A-22R-1858-07	1.17507	1.34579
TCGA-05-4425-01A-01R-1755-07	2.54574	2.32962
TCGA-05-4426-01A-01R-1206-07	2.03804	3.16953
TCGA-05-4427-01A-21R-1858-07	1.9366	3.56511
TCGA-05-4430-01A-02R-1206-07	1.30218	1.80548
TCGA-05-4432-01A-01R-1206-07	3.18409	1.64005
TCGA-05-4433-01A-22R-1858-07	1.68233	1.4907
TCGA-05-4434-01A-01R-1206-07	2.01226	3.23657
TCGA-05-5420-01A-01R-1628-07	3.10417	2.77984
TCGA-05-5423-01A-01R-1628-07	1.98337	1.479
TCGA-05-5425-01A-02R-1628-07	2.25031	2.10849
TCGA-05-5428-01A-01R-1628-07	2.59991	1.39867
TCGA-05-5429-01A-01R-1628-07	2.60487	0.378064
TCGA-05-5715-01A-01R-1628-07	1.05237	0.954561
TCGA-35-3615-01A-01R-0946-07	2.10974	0.926521
TCGA-35-4122-01A-01R-1107-07	3.09672	2.85267
TCGA-35-4123-01A-01R-1107-07	3.17133	4.09837
TCGA-35-5375-01A-01R-1628-07	2.98107	2.01032
TCGA-38-4625-01A-01R-1206-07	3.52674	4.91162
TCGA-38-4626-01A-01R-1206-07	1.86516	2.43816
TCGA-38-4627-01A-01R-1206-07	1.3378	1.23478
TCGA-38-4628-01A-01R-1206-07	1.20323	0.919184
TCGA-38-4629-01A-02R-1206-07	1.75913	3.2052
TCGA-38-4630-01A-01R-1206-07	3.18137	1.01351
TCGA-38-4631-01A-01R-1755-07	2.7992	0.698049
TCGA-38-4632-01A-01R-1755-07	2.26338	2.60129
TCGA-38-6178-01A-11R-1755-07	2.8954	1.08471
TCGA-38-7271-01A-11R-2039-07	1.56375	2.04329
TCGA-38-A44F-01A-11R-A24H-07	2.1649	1.86182
TCGA-44-2655-01A-01R-0946-07	2.42325	1.01176
TCGA-44-2656-01A-02R-0946-07	1.9324	3.84561
TCGA-44-2656-01A-02R-A278-07	1.41376	4.2673
TCGA-44-2656-01B-06R-A277-07	2.23819	4.62155
TCGA-44-2657-01A-01R-1107-07	2.0917	1.73773
TCGA-44-2659-01A-01R-0946-07	1.9059	1.58671
TCGA-44-2661-01A-01R-1107-07	2.47276	2.06354
TCGA-44-2662-01A-01R-0946-07	2.05757	3.68198
TCGA-44-2662-01A-01R-A278-07	1.81148	3.70433
TCGA-44-2662-01B-02R-A277-07	3.12798	4.05919
TCGA-44-2665-01A-01R-0946-07	2.54386	2.59667
TCGA-44-2666-01A-01R-0946-07	2.06461	2.3863
TCGA-44-2666-01A-01R-A278-07	1.50024	2.34937
TCGA-44-2666-01B-02R-A277-07	2.69727	2.68309
TCGA-44-2668-01A-01R-0946-07	1.87764	3.24267
TCGA-44-2668-01A-01R-A278-07	1.23405	3.18278
TCGA-44-2668-01B-02R-A277-07	2.85748	3.78803
TCGA-44-3396-01A-01R-1206-07	2.9439	3.35693
TCGA-44-3398-01A-01R-1107-07	2.07161	2.89877
TCGA-44-3917-01A-01R-A278-07	2.94128	1.61381
TCGA-44-3917-01B-02R-A277-07	3.91345	2.50801
TCGA-44-3918-01A-01R-1107-07	2.27965	4.50721
TCGA-44-3918-01A-01R-A278-07	1.36557	4.9906
TCGA-44-3918-01B-02R-A277-07	2.01883	5.06373
TCGA-44-3919-01A-02R-1107-07	1.73199	2.73702
TCGA-44-4112-01A-01R-1107-07	2.16378	1.67858
TCGA-44-4112-01B-06R-A277-07	2.48995	2.68257
TCGA-44-5643-01A-01R-1628-07	4.17486	1.04565
TCGA-44-5644-01A-21R-2039-07	3.22296	0.529968
TCGA-44-5645-01A-01R-1628-07	2.01143	1.63213
TCGA-44-5645-01A-01R-A278-07	1.29714	1.6803
TCGA-44-5645-01B-04R-A277-07	2.20871	2.50999
TCGA-44-6145-01A-11R-1755-07	1.80317	3.03765
TCGA-44-6146-01A-11R-1755-07	1.52809	0.844155
TCGA-44-6146-01A-11R-A278-07	1.03938	0.802169
TCGA-44-6146-01B-04R-A277-07	1.91316	1.8271
TCGA-44-6147-01A-11R-1755-07	2.4843	0.942695
TCGA-44-6147-01A-11R-A278-07	1.99429	1.17397
TCGA-44-6147-01B-06R-A277-07	2.13352	2.50643
TCGA-44-6148-01A-11R-1755-07	1.74573	1.37332
TCGA-44-6774-01A-21R-1858-07	2.11935	1.49719
TCGA-44-6775-01A-11R-1858-07	1.78739	1.97041
TCGA-44-6775-01A-11R-A278-07	1.48128	2.10725
TCGA-44-6775-01C-02R-A277-07	2.0852	2.83109
TCGA-44-6776-01A-11R-1858-07	1.75888	0.794839
TCGA-44-6777-01A-11R-1858-07	1.16585	2.5617
TCGA-44-6778-01A-11R-1858-07	2.2317	3.42877
TCGA-44-6779-01A-11R-1858-07	1.12505	2.53275
TCGA-44-7659-01A-11R-2066-07	2.27628	1.7307
TCGA-44-7660-01A-11R-2066-07	2.89225	1.93595
TCGA-44-7661-01A-11R-2066-07	2.00346	4.84636
TCGA-44-7662-01A-11R-2066-07	2.61476	2.54778
TCGA-44-7667-01A-31R-2066-07	3.11009	0.894279
TCGA-44-7669-01A-21R-2066-07	2.49888	1.90656
TCGA-44-7670-01A-11R-2066-07	3.5082	1.58396
TCGA-44-7671-01A-11R-2066-07	2.62246	0.613751
TCGA-44-7672-01A-11R-2066-07	2.29563	2.52892
TCGA-44-8117-01A-11R-2241-07	3.05413	2.11752
TCGA-44-8119-01A-11R-2241-07	3.26127	1.53816
TCGA-44-8120-01A-11R-2241-07	2.36193	1.32198
TCGA-44-A479-01A-31R-A24H-07	3.45342	2.5581
TCGA-44-A47A-01A-21R-A24H-07	2.87234	1.97623
TCGA-44-A47B-01A-11R-A24H-07	2.87446	0.99886
TCGA-44-A47G-01A-21R-A24H-07	2.41943	3.16599
TCGA-44-A4SS-01A-11R-A24X-07	2.35633	2.0486
TCGA-44-A4SU-01A-11R-A24X-07	2.86057	1.6821
TCGA-49-4486-01A-01R-1206-07	3.32359	0.498652
TCGA-49-4487-01A-21R-1858-07	3.33699	1.81252
TCGA-49-4488-01A-01R-1755-07	2.97883	2.2034
TCGA-49-4490-01A-21R-1858-07	2.13201	0.661793
TCGA-49-4494-01A-01R-1206-07	1.83291	1.78847
TCGA-49-4501-01A-01R-1206-07	2.15457	1.5804
TCGA-49-4505-01A-01R-1206-07	2.17378	2.42416
TCGA-49-4506-01A-01R-1206-07	3.97327	0.873569
TCGA-49-4507-01A-01R-1206-07	3.79764	1.14672
TCGA-49-4510-01A-01R-1206-07	3.53513	0.994358
TCGA-49-4512-01A-21R-1858-07	2.91163	1.09273
TCGA-49-4514-01A-21R-1858-07	2.14219	0.612265
TCGA-49-6742-01A-11R-1858-07	2.00614	0.888957
TCGA-49-6743-01A-11R-1858-07	2.64236	2.38249
TCGA-49-6744-01A-11R-1858-07	1.54129	1.8614
TCGA-49-6745-01A-11R-1858-07	1.5144	4.75893
TCGA-49-6761-01A-31R-1949-07	2.75843	3.58222
TCGA-49-6767-01A-11R-1858-07	2.8647	3.20783
TCGA-49-AAQV-01A-11R-A39D-07	3.09415	2.13013
TCGA-49-AAR0-01A-21R-A39D-07	3.95882	1.40108
TCGA-49-AAR2-01A-11R-A39D-07	4.12369	0.659508
TCGA-49-AAR3-01A-11R-A41B-07	3.76816	4.16124
TCGA-49-AAR4-01A-12R-A41B-07	2.96797	2.95243
TCGA-49-AAR9-01A-21R-A41B-07	2.74632	0.863599
TCGA-49-AARE-01A-11R-A41B-07	3.67951	0.945025
TCGA-49-AARN-01A-21R-A41B-07	3.16903	2.10832
TCGA-49-AARO-01A-12R-A41B-07	2.77599	2.69914
TCGA-49-AARQ-01A-11R-A41B-07	3.45758	1.16026
TCGA-49-AARR-01A-11R-A41B-07	2.26617	2.22708
TCGA-4B-A93V-01A-11R-A39D-07	3.7659	3.63461
TCGA-50-5044-01A-21R-1858-07	1.97512	3.5481
TCGA-50-5045-01A-01R-1628-07	2.14107	2.77506
TCGA-50-5049-01A-01R-1628-07	2.80786	2.3746
TCGA-50-5051-01A-21R-1858-07	3.50249	0.987284
TCGA-50-5055-01A-01R-1628-07	2.35566	1.39446
TCGA-50-5066-01A-01R-1628-07	2.32294	1.99158
TCGA-50-5066-02A-11R-2090-07	2.55729	1.37737
TCGA-50-5068-01A-01R-1628-07	2.61976	1.37919
TCGA-50-5072-01A-21R-1858-07	1.8615	1.38204
TCGA-50-5930-01A-11R-1755-07	2.80546	0.974757
TCGA-50-5931-01A-11R-1755-07	3.15626	0.482839
TCGA-50-5932-01A-11R-1755-07	1.72997	0.872603
TCGA-50-5933-01A-11R-1755-07	1.92615	4.12691
TCGA-50-5935-01A-11R-1755-07	2.11571	1.45525
TCGA-50-5936-01A-11R-1628-07	1.98715	1.14409
TCGA-50-5939-01A-11R-1628-07	1.8899	2.32486
TCGA-50-5941-01A-11R-1755-07	1.74512	3.08839
TCGA-50-5942-01A-21R-1755-07	2.20026	1.07247
TCGA-50-5944-01A-11R-1755-07	2.075	1.05855
TCGA-50-5946-01A-11R-1755-07	2.86319	0.988957
TCGA-50-5946-02A-11R-2090-07	2.39445	1.40039
TCGA-50-6590-01A-12R-1858-07	2.88686	4.17055
TCGA-50-6591-01A-11R-1755-07	3.79237	0.300967
TCGA-50-6592-01A-11R-1755-07	3.64296	2.01849
TCGA-50-6593-01A-11R-1755-07	2.93743	2.39154
TCGA-50-6594-01A-11R-1755-07	2.58801	5.86431
TCGA-50-6595-01A-12R-1858-07	2.26098	4.1547
TCGA-50-6597-01A-11R-1858-07	1.52158	1.27296
TCGA-50-6673-01A-11R-1949-07	2.33414	0.94125
TCGA-50-7109-01A-11R-2039-07	1.78974	1.19169
TCGA-50-8457-01A-11R-2326-07	1.88165	1.29682
TCGA-50-8459-01A-11R-2326-07	1.87699	1.08002
TCGA-50-8460-01A-11R-2326-07	1.99177	1.35795
TCGA-53-7624-01A-11R-2066-07	2.79364	2.74525
TCGA-53-7626-01A-12R-2066-07	1.98416	1.93208
TCGA-53-7813-01A-11R-2170-07	2.72747	1.27317
TCGA-53-A4EZ-01A-12R-A24X-07	2.93597	1.35899
TCGA-55-1592-01A-01R-0946-07	2.42779	1.63368
TCGA-55-1594-01A-01R-0946-07	2.15655	1.74053
TCGA-55-1596-01A-01R-0946-07	2.57112	1.11461
TCGA-55-5899-01A-11R-1628-07	2.09132	1.62839
TCGA-55-6543-01A-11R-1755-07	2.08769	2.24263
TCGA-55-6642-01A-11R-1858-07	2.58039	1.57392
TCGA-55-6712-01A-11R-1858-07	2.31442	2.97106
TCGA-55-6968-01A-11R-1949-07	2.55052	2.67492
TCGA-55-6970-01A-11R-1949-07	1.92565	2.17608
TCGA-55-6971-01A-11R-1949-07	2.20465	2.36748
TCGA-55-6972-01A-11R-1949-07	2.35457	0.321558
TCGA-55-6975-01A-11R-1949-07	2.09179	0.69372
TCGA-55-6978-01A-11R-1949-07	2.79502	4.51786
TCGA-55-6979-01A-11R-1949-07	3.03668	3.94625
TCGA-55-6980-01A-11R-1949-07	1.67214	2.06931
TCGA-55-6981-01A-11R-1949-07	2.079	1.85111
TCGA-55-6982-01A-11R-1949-07	2.93001	1.84161
TCGA-55-6983-01A-11R-1949-07	2.87856	1.21224
TCGA-55-6984-01A-11R-1949-07	2.06031	1.04716
TCGA-55-6985-01A-11R-1949-07	2.24814	2.42617
TCGA-55-6986-01A-11R-1949-07	2.65798	1.5529
TCGA-55-6987-01A-11R-1949-07	3.2688	3.28981
TCGA-55-7227-01A-11R-2039-07	2.02495	2.87448
TCGA-55-7281-01A-11R-2039-07	1.80301	1.17124
TCGA-55-7283-01A-11R-2039-07	2.19843	1.36047
TCGA-55-7284-01B-11R-2241-07	1.83395	1.83802
TCGA-55-7570-01A-11R-2039-07	3.67729	0.97634
TCGA-55-7573-01A-11R-2039-07	1.60378	1.43024
TCGA-55-7574-01A-11R-2039-07	2.36533	1.73341
TCGA-55-7576-01A-11R-2066-07	2.02258	1.73574
TCGA-55-7724-01A-11R-2170-07	1.62182	2.05268
TCGA-55-7725-01A-11R-2170-07	2.90248	2.3187
TCGA-55-7726-01A-11R-2170-07	2.53984	1.33574
TCGA-55-7727-01A-11R-2170-07	2.06396	2.1132
TCGA-55-7728-01A-11R-2187-07	2.20449	2.08073
TCGA-55-7815-01A-11R-2170-07	1.17117	2.01912
TCGA-55-7816-01A-11R-2170-07	1.49773	2.25322
TCGA-55-7903-01A-11R-2170-07	3.15895	3.33664
TCGA-55-7907-01A-11R-2170-07	2.63161	1.75928
TCGA-55-7910-01A-11R-2170-07	4.42685	1.09789
TCGA-55-7911-01A-11R-2170-07	2.44791	3.39762
TCGA-55-7913-01B-11R-2241-07	3.24218	0.545562
TCGA-55-7914-01A-11R-2170-07	2.74127	2.26335
TCGA-55-7994-01A-11R-2187-07	1.84151	4.56603
TCGA-55-7995-01A-11R-2187-07	2.46399	2.59638
TCGA-55-8085-01A-11R-2241-07	2.62245	1.45981
TCGA-55-8087-01A-11R-2241-07	1.71776	0.716681
TCGA-55-8089-01A-11R-2241-07	1.82736	3.17445
TCGA-55-8090-01A-11R-2241-07	1.85781	3.19128
TCGA-55-8091-01A-11R-2241-07	2.03838	3.28166
TCGA-55-8092-01A-11R-2241-07	3.16746	1.98621
TCGA-55-8094-01A-11R-2241-07	3.00555	0.591543
TCGA-55-8096-01A-11R-2241-07	2.45714	1.20201
TCGA-55-8097-01A-11R-2241-07	3.47268	0.998697
TCGA-55-8203-01A-11R-2241-07	1.90983	1.76513
TCGA-55-8204-01A-11R-2241-07	2.04003	2.17526
TCGA-55-8205-01A-11R-2241-07	2.29412	4.55306
TCGA-55-8206-01A-11R-2241-07	2.22905	1.61322
TCGA-55-8207-01A-11R-2241-07	2.4616	1.48813
TCGA-55-8208-01A-11R-2241-07	2.39655	3.48562
TCGA-55-8299-01A-11R-2287-07	2.26846	2.94838
TCGA-55-8301-01A-11R-2287-07	3.20334	3.70936
TCGA-55-8302-01A-11R-2326-07	2.90091	4.41356
TCGA-55-8505-01A-11R-2403-07	2.22255	0.630223
TCGA-55-8506-01A-11R-2403-07	1.94984	1.9074
TCGA-55-8507-01A-11R-2403-07	3.2308	1.14544
TCGA-55-8508-01A-11R-2403-07	3.15057	1.14585
TCGA-55-8510-01A-11R-2403-07	2.73069	2.76919
TCGA-55-8511-01A-11R-2403-07	1.64336	3.78843
TCGA-55-8512-01A-11R-2403-07	1.93947	1.35257
TCGA-55-8513-01A-11R-2403-07	1.99425	2.2676
TCGA-55-8514-01A-11R-2403-07	3.82258	1.60809
TCGA-55-8614-01A-11R-2403-07	3.55346	1.40675
TCGA-55-8615-01A-11R-2403-07	2.86173	0.44435
TCGA-55-8616-01A-11R-2403-07	3.3897	2.12839
TCGA-55-8619-01A-11R-2403-07	2.44981	1.8167
TCGA-55-8620-01A-11R-2403-07	2.76127	1.57278
TCGA-55-8621-01A-11R-2403-07	1.89339	3.0322
TCGA-55-A48X-01A-11R-A24H-07	2.47528	1.97136
TCGA-55-A48Y-01A-11R-A24H-07	1.74167	1.03683
TCGA-55-A48Z-01A-12R-A24X-07	3.54422	2.77339
TCGA-55-A490-01A-11R-A466-07	2.40075	0.78228
TCGA-55-A491-01A-11R-A24H-07	2.5922	2.28729
TCGA-55-A492-01A-11R-A24H-07	2.97489	0.459278
TCGA-55-A493-01A-11R-A24H-07	2.93605	4.10082
TCGA-55-A494-01A-11R-A24X-07	2.6664	0.410256
TCGA-55-A4DF-01A-11R-A24H-07	0.928077	3.25921
TCGA-55-A4DG-01A-11R-A24H-07	2.66255	1.42205
TCGA-55-A57B-01A-12R-A39D-07	1.90709	1.79013
TCGA-62-8394-01A-11R-2326-07	2.02496	1.32912
TCGA-62-8395-01A-11R-2326-07	2.00189	0.567381
TCGA-62-8397-01A-11R-2326-07	1.29313	0.9609
TCGA-62-8398-01A-11R-2326-07	2.2079	1.93944
TCGA-62-8399-01A-21R-2326-07	4.2317	1.89132
TCGA-62-8402-01A-11R-2326-07	3.1744	2.9836
TCGA-62-A46O-01A-11R-A24H-07	3.1063	0.923086
TCGA-62-A46P-01A-11R-A24H-07	3.83165	0.645221
TCGA-62-A46R-01A-11R-A24H-07	2.33959	2.03451
TCGA-62-A46S-01A-11R-A24H-07	2.59209	1.35629
TCGA-62-A46V-01A-11R-A24H-07	2.65652	1.17157
TCGA-62-A46Y-01A-11R-A24H-07	2.47218	3.09816
TCGA-62-A470-01A-11R-A24H-07	3.04131	1.36049
TCGA-62-A471-01A-12R-A24H-07	3.29158	1.11562
TCGA-62-A472-01A-11R-A24H-07	3.20377	3.10971
TCGA-64-1676-01A-01R-0946-07	2.15786	3.49284
TCGA-64-1677-01A-01R-0946-07	3.8951	2.23325
TCGA-64-1678-01A-01R-0946-07	2.73362	0.320089
TCGA-64-1679-01A-21R-2066-07	1.96517	1.74612
TCGA-64-1680-01A-02R-0946-07	2.03414	0.944477
TCGA-64-1681-01A-11R-2066-07	2.07444	1.25927
TCGA-64-5774-01A-01R-1628-07	2.92273	1.19767
TCGA-64-5775-01A-01R-1628-07	1.87036	4.2819
TCGA-64-5778-01A-01R-1628-07	2.97125	2.97731
TCGA-64-5779-01A-01R-1628-07	2.736	1.19339
TCGA-64-5781-01A-01R-1628-07	3.3417	1.93587
TCGA-64-5815-01A-01R-1628-07	1.71162	1.85331
TCGA-67-3770-01A-01R-0946-07	1.33972	1.14818
TCGA-67-3771-01A-01R-0946-07	3.53495	1.66063
TCGA-67-3772-01A-01R-0946-07	2.32961	0.689851
TCGA-67-3773-01A-01R-0946-07	2.05972	2.09707
TCGA-67-3774-01A-01R-0946-07	1.66843	1.43939
TCGA-67-4679-01B-01R-1755-07	2.30636	1.61573
TCGA-67-6215-01A-11R-1755-07	2.12318	1.00698
TCGA-67-6216-01A-11R-1755-07	1.87001	2.11803
TCGA-67-6217-01A-11R-1755-07	1.98799	1.45698
TCGA-69-7760-01A-11R-2170-07	2.41988	0.943179
TCGA-69-7761-01A-11R-2170-07	1.78807	2.21975
TCGA-69-7763-01A-11R-2170-07	2.26069	1.38885
TCGA-69-7764-01A-11R-2170-07	2.41888	1.05804
TCGA-69-7765-01A-11R-2170-07	2.65838	1.78923
TCGA-69-7973-01A-11R-2187-07	2.23712	1.07393
TCGA-69-7974-01A-11R-2187-07	1.77534	3.686
TCGA-69-7978-01A-11R-2187-07	2.58908	4.28208
TCGA-69-7979-01A-11R-2187-07	3.3835	1.54439
TCGA-69-7980-01A-11R-2187-07	1.89526	2.40415
TCGA-69-8253-01A-11R-2287-07	3.12429	0.828727
TCGA-69-8254-01A-11R-2287-07	1.81598	1.83108
TCGA-69-8255-01A-11R-2287-07	3.48104	1.65878
TCGA-69-8453-01A-12R-2326-07	2.13807	1.89309
TCGA-69-A59K-01A-11R-A262-07	2.92026	4.79281
TCGA-71-6725-01A-11R-1858-07	2.75213	0.811093
TCGA-71-8520-01A-11R-2403-07	1.72906	1.80874
TCGA-73-4658-01A-01R-1755-07	1.68845	3.7874
TCGA-73-4659-01A-01R-1206-07	3.14557	1.4445
TCGA-73-4662-01A-01R-1206-07	2.56264	2.52048
TCGA-73-4666-01A-01R-1206-07	2.56396	4.30526
TCGA-73-4668-01A-01R-1206-07	2.25699	1.30809
TCGA-73-4670-01A-01R-1206-07	2.65981	1.03173
TCGA-73-4675-01A-01R-1206-07	2.31075	0.429135
TCGA-73-4676-01A-01R-1755-07	1.97063	2.72454
TCGA-73-4677-01A-01R-1206-07	1.49978	1.14608
TCGA-73-7498-01A-12R-2187-07	2.53677	0.854347
TCGA-73-7499-01A-11R-2187-07	3.38534	1.95684
TCGA-73-A9RS-01A-11R-A41B-07	3.00466	2.18007
TCGA-75-5122-01A-01R-1755-07	2.289	3.92056
TCGA-75-5125-01A-01R-1755-07	2.03775	5.1794
TCGA-75-5126-01A-01R-1755-07	2.09311	5.04913
TCGA-75-5146-01A-01R-1628-07	4.13105	0.799782
TCGA-75-5147-01A-01R-1628-07	2.09838	1.56023
TCGA-75-6203-01A-11R-1755-07	1.28294	1.88819
TCGA-75-6205-01A-11R-1755-07	2.77649	3.115
TCGA-75-6206-01A-11R-1755-07	2.15348	0.926445
TCGA-75-6207-01A-11R-1755-07	2.80152	4.1687
TCGA-75-6211-01A-11R-1755-07	3.2574	0.77479
TCGA-75-6212-01A-11R-1755-07	1.50211	1.45623
TCGA-75-6214-01A-41R-1949-07	1.51515	2.07098
TCGA-75-7025-01A-12R-1949-07	2.11437	1.38097
TCGA-75-7027-01A-11R-1949-07	3.64917	0.85341
TCGA-75-7030-01A-11R-1949-07	1.73273	1.64297
TCGA-75-7031-01A-11R-1949-07	2.22323	1.35227
TCGA-78-7143-01A-11R-2039-07	2.54869	1.9063
TCGA-78-7145-01A-11R-2039-07	1.78143	1.88094
TCGA-78-7146-01A-11R-2039-07	2.64123	2.40853
TCGA-78-7147-01A-11R-2039-07	2.49336	1.09644
TCGA-78-7148-01A-11R-2039-07	2.50139	0.926912
TCGA-78-7149-01A-11R-2039-07	2.12365	0.333433
TCGA-78-7150-01A-21R-2039-07	1.81218	0.833059
TCGA-78-7152-01A-11R-2039-07	3.44265	0.91318
TCGA-78-7153-01A-11R-2039-07	2.29166	0.30774
TCGA-78-7154-01A-11R-2039-07	3.05266	0.947702
TCGA-78-7155-01A-11R-2039-07	3.45248	1.03724
TCGA-78-7156-01A-11R-2039-07	1.63212	0.589676
TCGA-78-7158-01A-11R-2039-07	2.98556	1.13301
TCGA-78-7159-01A-11R-2039-07	2.21428	1.1503
TCGA-78-7160-01A-11R-2039-07	2.34543	2.00927
TCGA-78-7161-01A-11R-2039-07	3.33819	0.562638
TCGA-78-7162-01A-21R-2066-07	1.54799	1.28357
TCGA-78-7163-01A-12R-2066-07	2.27988	1.98119
TCGA-78-7166-01A-12R-2066-07	2.55978	0.726759
TCGA-78-7167-01A-11R-2066-07	2.44753	0.272626
TCGA-78-7220-01A-11R-2039-07	3.58769	1.27109
TCGA-78-7535-01A-11R-2066-07	2.54558	0.76636
TCGA-78-7536-01A-11R-2066-07	4.48877	1.16563
TCGA-78-7537-01A-11R-2066-07	1.77119	0.622523
TCGA-78-7539-01A-11R-2066-07	1.79134	1.96182
TCGA-78-7540-01A-11R-2066-07	1.33169	1.1921
TCGA-78-7542-01A-21R-2066-07	2.30702	4.33281
TCGA-78-7633-01A-11R-2066-07	1.27216	0.627715
TCGA-78-8640-01A-11R-2403-07	3.93376	1.24195
TCGA-78-8648-01A-11R-2403-07	2.345	2.00329
TCGA-78-8655-01A-11R-2403-07	3.08414	1.63975
TCGA-78-8660-01A-11R-2403-07	3.80074	2.53957
TCGA-78-8662-01A-11R-2403-07	3.40613	0.618862
TCGA-80-5607-01A-31R-1949-07	3.55023	1.71488
TCGA-80-5608-01A-31R-1949-07	2.08865	1.25899
TCGA-80-5611-01A-01R-1628-07	2.11643	1.80705
TCGA-83-5908-01A-21R-2287-07	3.28883	5.3592
TCGA-86-6562-01A-11R-1755-07	1.91728	1.85523
TCGA-86-6851-01A-11R-1949-07	2.08212	2.67155
TCGA-86-7701-01A-11R-2170-07	2.42548	1.86467
TCGA-86-7711-01A-11R-2066-07	2.6154	1.57182
TCGA-86-7713-01A-11R-2066-07	3.81503	0.999216
TCGA-86-7714-01A-12R-2170-07	1.97757	1.12916
TCGA-86-7953-01A-11R-2187-07	1.69229	1.26488
TCGA-86-7954-01A-11R-2187-07	1.99301	2.37915
TCGA-86-7955-01A-11R-2187-07	2.95463	0.639761
TCGA-86-8054-01A-11R-2241-07	3.83639	0.969352
TCGA-86-8055-01A-11R-2241-07	1.5838	1.8671
TCGA-86-8056-01A-11R-2241-07	2.08776	1.64133
TCGA-86-8073-01A-11R-2241-07	2.24306	1.05444
TCGA-86-8074-01A-11R-2241-07	2.1742	1.91834
TCGA-86-8075-01A-11R-2241-07	1.73539	2.23397
TCGA-86-8076-01A-31R-2241-07	2.33246	1.72158
TCGA-86-8278-01A-11R-2287-07	2.01832	1.96323
TCGA-86-8279-01A-11R-2287-07	2.86567	0.708499
TCGA-86-8280-01A-11R-2287-07	2.26707	2.08135
TCGA-86-8281-01A-11R-2287-07	2.16494	0.595632
TCGA-86-8358-01A-11R-2326-07	3.49314	1.37491
TCGA-86-8359-01A-11R-2326-07	2.38258	1.15067
TCGA-86-8585-01A-11R-2403-07	2.76751	2.16006
TCGA-86-8668-01A-11R-2403-07	1.47419	1.57448
TCGA-86-8669-01A-11R-2403-07	2.8944	1.44461
TCGA-86-8671-01A-11R-2403-07	2.52174	2.61757
TCGA-86-8672-01A-21R-2403-07	2.86155	2.44944
TCGA-86-8673-01A-11R-2403-07	2.07794	0.774203
TCGA-86-8674-01A-21R-2403-07	2.40991	0.863327
TCGA-86-A456-01A-11R-A24H-07	2.79233	2.9336
TCGA-86-A4D0-01A-11R-A24H-07	3.55799	1.25548
TCGA-86-A4JF-01A-11R-A24X-07	2.48821	3.2628
TCGA-86-A4P7-01A-11R-A24X-07	2.38033	1.79554
TCGA-86-A4P8-01A-11R-A24X-07	2.12792	2.40796
TCGA-91-6828-01A-11R-1858-07	2.7482	2.05609
TCGA-91-6829-01A-21R-1858-07	2.02738	1.85981
TCGA-91-6830-01A-11R-1949-07	1.96474	2.02909
TCGA-91-6831-01A-11R-1858-07	2.73174	1.74369
TCGA-91-6835-01A-11R-1858-07	1.98188	2.65448
TCGA-91-6836-01A-21R-1858-07	3.65806	3.03883
TCGA-91-6840-01A-11R-1949-07	2.99216	1.15525
TCGA-91-6847-01A-11R-1949-07	3.90602	1.30521
TCGA-91-6848-01A-11R-1949-07	2.74997	4.05862
TCGA-91-6849-01A-11R-1949-07	2.21153	1.03159
TCGA-91-7771-01A-11R-2170-07	2.47818	1.63664
TCGA-91-8496-01A-11R-2403-07	1.80363	1.82884
TCGA-91-8497-01A-11R-2403-07	2.20342	1.64155
TCGA-91-8499-01A-11R-2403-07	3.33722	1.37748
TCGA-91-A4BC-01A-11R-A24H-07	3.658	1.74085
TCGA-91-A4BD-01A-11R-A24H-07	2.87611	1.16974
TCGA-93-7347-01A-11R-2187-07	1.93444	1.64466
TCGA-93-7348-01A-21R-2039-07	2.02403	1.31121
TCGA-93-8067-01A-11R-2287-07	2.81259	1.00401
TCGA-93-A4JN-01A-11R-A24X-07	3.38921	1.80334
TCGA-93-A4JO-01A-21R-A24X-07	4.01679	2.27931
TCGA-93-A4JP-01A-11R-A24X-07	2.32576	2.21543
TCGA-93-A4JQ-01A-11R-A24X-07	2.51002	2.91296
TCGA-95-7039-01A-11R-1949-07	3.69319	2.3077
TCGA-95-7043-01A-11R-1949-07	3.59607	0.351993
TCGA-95-7562-01A-11R-2241-07	2.09145	1.46949
TCGA-95-7567-01A-11R-2066-07	3.36035	1.96856
TCGA-95-7944-01A-11R-2187-07	2.48693	2.80814
TCGA-95-7947-01A-11R-2187-07	1.63899	1.90571
TCGA-95-7948-01A-11R-2187-07	3.30173	0.442124
TCGA-95-8039-01A-11R-2241-07	2.71021	2.18214
TCGA-95-8494-01A-11R-2326-07	3.59133	2.68566
TCGA-95-A4VK-01A-11R-A262-07	2.28673	1.26827
TCGA-95-A4VN-01A-11R-A262-07	2.58321	5.51347
TCGA-95-A4VP-01A-21R-A262-07	3.26019	1.58322
TCGA-97-7546-01A-11R-2039-07	1.81247	2.6503
TCGA-97-7547-01A-11R-2039-07	1.97554	1.51374
TCGA-97-7552-01A-11R-2039-07	1.88872	2.26751
TCGA-97-7553-01A-21R-2039-07	1.71657	2.66303
TCGA-97-7554-01A-11R-2039-07	1.66144	3.90522
TCGA-97-7937-01A-11R-2170-07	3.09935	0.799873
TCGA-97-7938-01A-11R-2170-07	1.94184	2.37889
TCGA-97-7941-01A-11R-2187-07	2.93606	1.06688
TCGA-97-8171-01A-11R-2287-07	3.39358	0.308355
TCGA-97-8172-01A-11R-2287-07	2.03022	1.35842
TCGA-97-8174-01A-11R-2287-07	1.62642	1.20224
TCGA-97-8175-01A-11R-2287-07	2.5723	2.86263
TCGA-97-8176-01A-11R-2403-07	2.634	0.606624
TCGA-97-8177-01A-11R-2287-07	2.4767	1.25263
TCGA-97-8179-01A-11R-2287-07	2.52794	1.34296
TCGA-97-8547-01A-11R-2403-07	2.11566	1.96407
TCGA-97-8552-01A-11R-2403-07	2.14354	1.45839
TCGA-97-A4LX-01A-11R-A24X-07	2.17799	3.41475
TCGA-97-A4M0-01A-11R-A24X-07	2.78327	1.98317
TCGA-97-A4M1-01A-11R-A24X-07	2.79737	1.82145
TCGA-97-A4M2-01A-12R-A24X-07	2.08233	2.47278
TCGA-97-A4M3-01A-11R-A24X-07	2.65539	0.877554
TCGA-97-A4M5-01A-11R-A24X-07	2.13134	1.87645
TCGA-97-A4M6-01A-11R-A24X-07	2.56473	2.21184
TCGA-97-A4M7-01A-11R-A24X-07	2.23592	2.24899
TCGA-99-7458-01A-11R-2039-07	1.23995	3.42742
TCGA-99-8025-01A-11R-2241-07	4.11308	1.36905
TCGA-99-8028-01A-11R-2241-07	2.77894	3.78424
TCGA-99-8032-01A-11R-2241-07	2.66143	1.10326
TCGA-99-8033-01A-11R-2241-07	2.54492	2.56745
TCGA-99-AA5R-01A-11R-A39D-07	2.45402	2.72281
TCGA-J2-8192-01A-11R-2241-07	1.56766	2.23217
TCGA-J2-8194-01A-11R-2241-07	1.71308	1.24038
TCGA-J2-A4AD-01A-11R-A24H-07	2.35838	1.18069
TCGA-J2-A4AE-01A-21R-A24H-07	2.81489	2.14
TCGA-J2-A4AG-01A-11R-A24H-07	2.48252	2.01517
TCGA-L4-A4E5-01A-11R-A24X-07	2.72208	2.47762
TCGA-L4-A4E6-01A-11R-A24H-07	2.57646	2.10492
TCGA-L9-A443-01A-12R-A24H-07	2.9696	1.71094
TCGA-L9-A444-01A-21R-A24H-07	2.7504	3.75707
TCGA-L9-A50W-01A-12R-A39D-07	2.18309	0.709552
TCGA-L9-A5IP-01A-21R-A39D-07	3.00202	1.98461
TCGA-L9-A743-01A-43R-A39D-07	3.64173	2.59804
TCGA-L9-A7SV-01A-11R-A39D-07	3.33193	0.894993
TCGA-L9-A8F4-01A-11R-A39D-07	4.05058	1.7965
TCGA-MN-A4N1-01A-11R-A24X-07	3.19463	1.29477
TCGA-MN-A4N4-01A-12R-A24X-07	3.4575	1.31295
TCGA-MN-A4N5-01A-11R-A24X-07	2.33442	3.52374
TCGA-MP-A4SV-01A-11R-A24X-07	4.03091	2.73157
TCGA-MP-A4SW-01A-21R-A24X-07	2.09715	1.70922
TCGA-MP-A4SY-01A-21R-A24X-07	2.99816	2.83641
TCGA-MP-A4T4-01A-11R-A262-07	2.46736	4.37425
TCGA-MP-A4T6-01A-32R-A262-07	3.02235	1.38458
TCGA-MP-A4T7-01A-11R-A24X-07	2.95417	1.24199
TCGA-MP-A4T8-01A-11R-A24X-07	3.38944	0.806429
TCGA-MP-A4T9-01A-11R-A24X-07	2.43839	2.78197
TCGA-MP-A4TA-01A-21R-A24X-07	3.65483	1.6005
TCGA-MP-A4TC-01A-11R-A24X-07	2.71434	3.89215
TCGA-MP-A4TD-01A-32R-A262-07	2.78734	0.864387
TCGA-MP-A4TE-01A-22R-A466-07	3.05858	0.611079
TCGA-MP-A4TF-01A-11R-A262-07	2.8475	3.35844
TCGA-MP-A4TH-01A-31R-A262-07	1.69727	1.63994
TCGA-MP-A4TI-01A-21R-A24X-07	2.72986	4.15378
TCGA-MP-A4TJ-01A-51R-A262-07	2.26139	3.54887
TCGA-MP-A4TK-01A-11R-A24X-07	2.76778	1.5583
TCGA-MP-A5C7-01A-11R-A262-07	2.44261	0.57448
TCGA-NJ-A4YF-01A-12R-A262-07	4.50471	0.490481
TCGA-NJ-A4YG-01A-22R-A262-07	2.8224	1.69682
TCGA-NJ-A4YI-01A-11R-A262-07	3.23437	3.04327
TCGA-NJ-A4YP-01A-11R-A262-07	3.10401	1.38885
TCGA-NJ-A4YQ-01A-11R-A262-07	3.15133	2.18284
TCGA-NJ-A55A-01A-11R-A262-07	2.72943	2.0544
TCGA-NJ-A55O-01A-11R-A262-07	2.12158	2.27123
TCGA-NJ-A55R-01A-11R-A262-07	2.39006	1.01874
TCGA-NJ-A7XG-01A-12R-A39D-07	3.38083	0.828062
TCGA-O1-A52J-01A-11R-A262-07	2.50087	1.42689
TCGA-S2-AA1A-01A-12R-A39D-07	2.77027	1.63263
