# Supplementary figures and images for: Enabling factor for cancer hallmark acquisition: Small nucleolar RNA host gene 17
Source: Frontiers journal article supplement (doi:10.3389/fonc.2022.974939), 2022-09-14

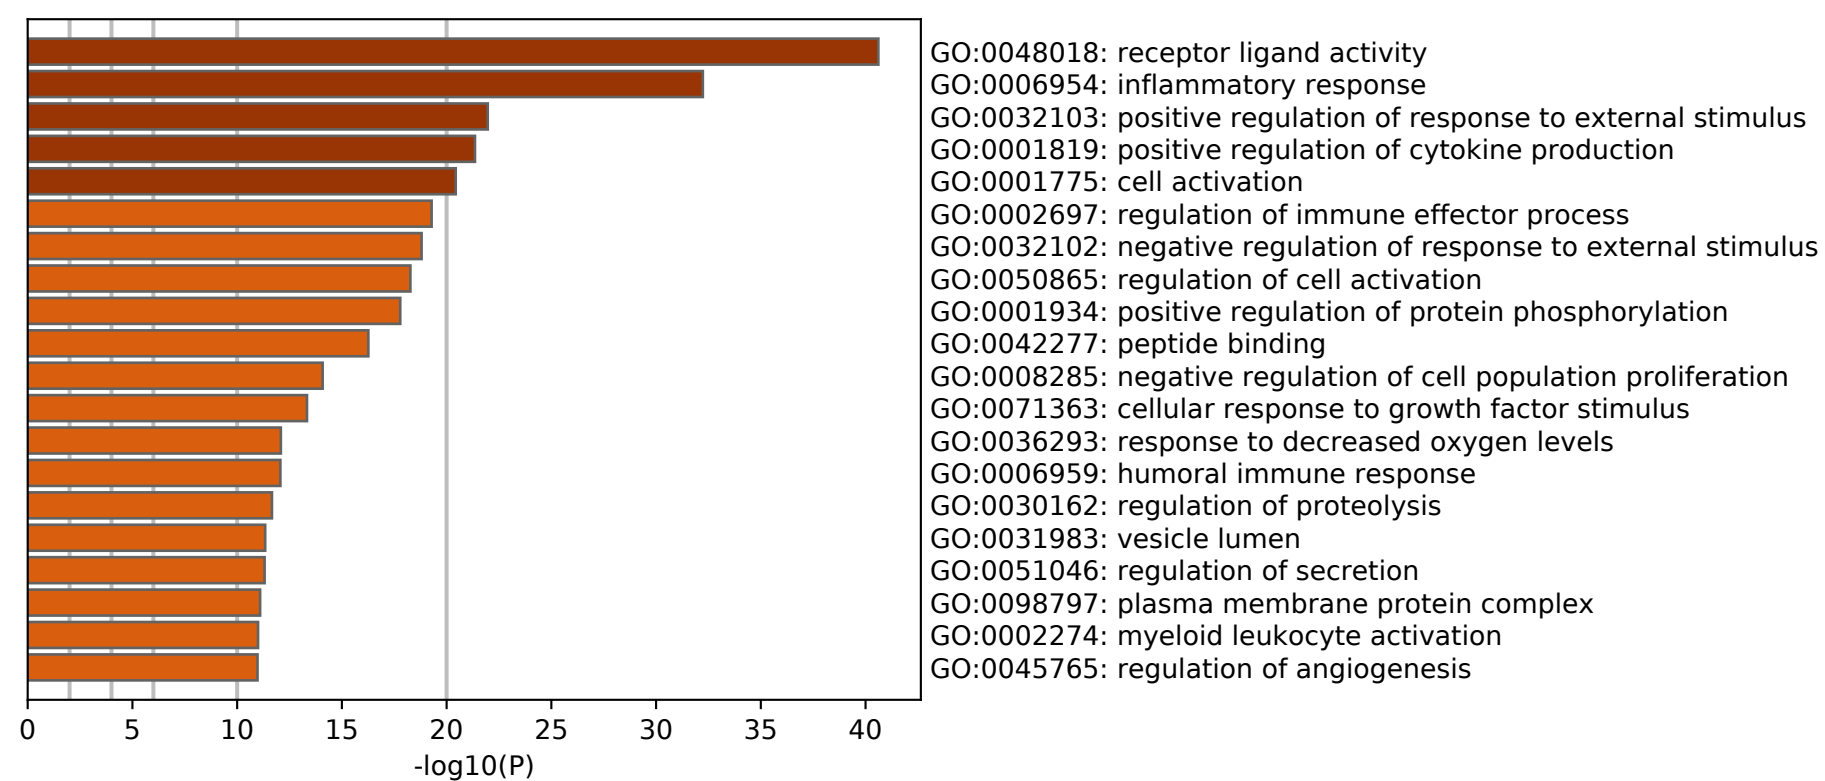

Supplement: Data_Sheet_2.zip [file metascapeΤͼGO.pdf › B/metascapeΤͼGO.pdf]

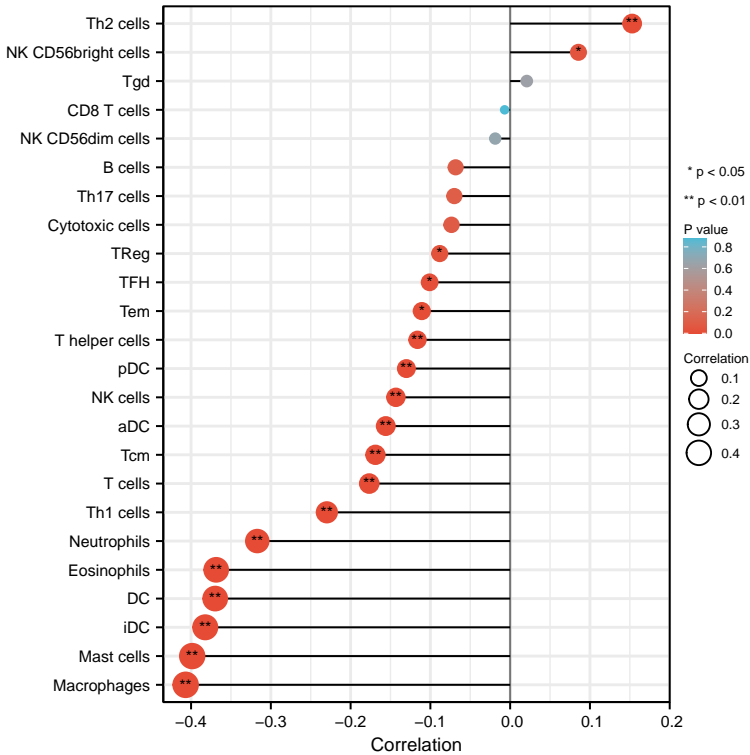

Supplement: Data_Sheet_3.zip [file SNHG17͸ϸͼ_2022-04-27_16_28_47.pdf › SNHG17͸ϸͼ_2022-04-27_16_28_47.pdf]

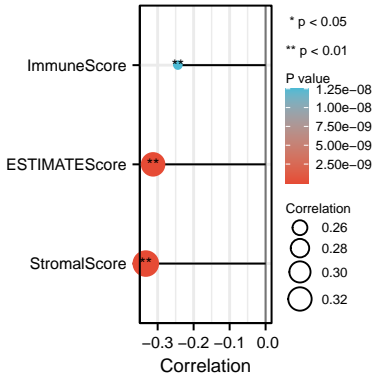

Supplement: Data_Sheet_4.zip [file ְͼ_2022-04-27_16_36_55.pdf › ְͼ_2022-04-27_16_36_55.pdf]

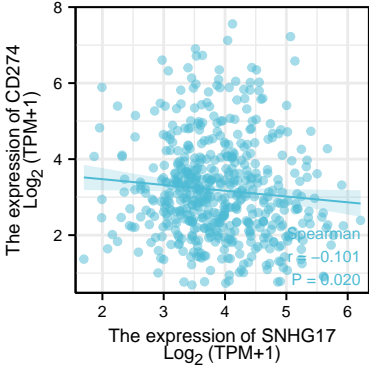

Supplement: Data_Sheet_5.zip [file Է_2022-06-13_20_02_37.pdf › Է_2022-06-13_20_02_37.pdf]
